# Supplementary material for: Synthesis, photophysical and electrochemical properties of donor–acceptor type hydrazinyl thiazolyl coumarins
Source: Royal Society of Chemistry journal article supplement (doi:10.1039/d0nj00082e), 2020-01-01
Supplement: d0nj00082e1.pdf [file d0nj00082e1.pdf]

## Supplementary Information

### Synthesis, Photophysical and Electrochemical Properties of Donor-Acceptor Type Hydrazinyl Thiazolyl Coumarins

G. Kumar,<sup>a</sup> G. Trivikram Reddy,<sup>a</sup> B. Ramakrishna,<sup>b</sup> Y. V. Divyasri,<sup>a</sup> L. Subramanyam Sarma<sup>a</sup> and  
N. C. Gangi Reddy\*<sup>a</sup>

<sup>a</sup> Department of Chemistry, School of Physical Sciences, Yogi Vemana University, Kadapa-516 003,  
Andhra Pradesh, India.

<sup>b</sup>School of Chemistry, University of Hyderabad, Central University P.O., Hyderabad 500 046, India  
E-mail: ncgreddy@yogivemanauniversity.ac.in

---

#### Table of Contents

| Contents                                                                                             | Page No. |
|------------------------------------------------------------------------------------------------------|----------|
| General information                                                                                  | S2       |
| Physical and spectral data ( <sup>1</sup> H NMR, HRMS and Mass)<br>of synthesized compounds (4a-4ak) | S3-S11   |
| Copies of <sup>1</sup> H NMR spectra of synthesized compounds (4a-4ak)                               | S12-S27  |
| Copies of HRMS and Mass spectra of synthesized compounds (4a-4ak)                                    | S28-S40  |
| X-ray crystal structure and data of compound <b>4b</b>                                               | S41-S51  |
| Cyclic voltammograms of HTC of aromatic aldehydes/ketones                                            | S51      |

## General information

All chemicals and solvents were purchased from commercial sources (Sigma Aldrich, Acros Organics Ltd., and Merck) and were used as received. The  $^1\text{H}$  NMR and  $^{13}\text{C}$  NMR (500 MHz and 125 MHz) spectra were recorded on Bruker NMR spectrometer (500 MHz). The data are reported as follows: chemical shift (ppm) and multiplicity [s (singlet), d (doublet), t (triplet), q (quartet), m (multiplet or unresolved) and brs (broad singlet)] and coupling constant(s) are given in Hz. High-Resolution Mass Spectra were recorded on i) Bruker micrOTOF-QII mass spectrometer and ii) Micromass ESI-TOF MS. Mass Spectra were recorded on Shimadzu-LCMS-2010 A mass spectrometer. XRD pattern was recorded using a Rigaku Miniflex 600 diffractometer. Absorbance spectra were recorded on Shimadzu model UV-3100 or Carry 100 Bio UV-Visible spectrophotometer and fluorescence emission spectra were recorded on a Jobin Yvon Horiba model Fluoromax-3 spectrofluorimeter. The quantum yields of titled compounds (4) were calculated using quinine sulphate as standard reference compound ( $\Phi_{\text{em}} = 0.545$  in 1.0 N  $\text{H}_2\text{SO}_4$ ). For HOMO and LUMO calculations, Cyclic voltammetry experiments were performed on a CHI6002E (CH Instruments Inc., USA) electrochemical workstation equipped with a standard three-electrode assembly. Melting points were determined by MR-Vis+ instrument (Labindia) and are uncorrected. Thin layer chromatography (TLC) was performed on 0.25 mm Merck silica gel plates and the developed plates are visualized under UV light. Millipore double distilled water was used for the workup process.

Physical and spectral data (<sup>1</sup>H NMR, <sup>13</sup>C NMR, HRMS and Mass) of synthesized compounds (4a-4ak)

**(E)-3-(2-(2-benzylidenehydrazinyl)thiazol-4-yl)-2H-chromen-2-one (4a):**

|                                                                                             |                                                                                                                                                                                                                                                                                                                                                                                                                                                                                                                                 |
|---------------------------------------------------------------------------------------------|---------------------------------------------------------------------------------------------------------------------------------------------------------------------------------------------------------------------------------------------------------------------------------------------------------------------------------------------------------------------------------------------------------------------------------------------------------------------------------------------------------------------------------|
| 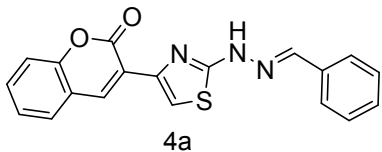 <p>4a</p> | Yellow solid, yield: 98%, mp: 208-210°C. <sup>1</sup> H NMR (500MHz, d <sub>6</sub> -DMSO): δ 12.19 (brs, 1H, -NH), 8.55 (s, 1H, Thiazole H), 8.07 (s, 1H, -N=C-H), 7.86 (dd, J=8.0 Hz, J=1.5 Hz, 1H, arom H), 7.78 (s, 1H, Coumarin C <sub>4</sub> -H), 7.68-7.66(m, 2H, arom H), 7.62 (td, J=7.0 Hz, J=1.5 Hz, 1H, arom H), 7.46-7.43 (m, 3H, arom H), 7.41-7.38 (m, 2H, arom H). HRMS (ESI): Anal. Calcd. For C <sub>19</sub> H <sub>14</sub> O <sub>2</sub> N <sub>3</sub> S [M +H] <sup>+</sup> 348.0801; Found: 348.0806. |
|---------------------------------------------------------------------------------------------|---------------------------------------------------------------------------------------------------------------------------------------------------------------------------------------------------------------------------------------------------------------------------------------------------------------------------------------------------------------------------------------------------------------------------------------------------------------------------------------------------------------------------------|

**(E)-3-(2-(2-(4-methoxybenzylidene)hydrazinyl)thiazol-4-yl)-2H-chromen-2-one(4b):**

|                                                                                              |                                                                                                                                                                                                                                                                                                                                                                                                                                                                                                                                                                                  |
|----------------------------------------------------------------------------------------------|----------------------------------------------------------------------------------------------------------------------------------------------------------------------------------------------------------------------------------------------------------------------------------------------------------------------------------------------------------------------------------------------------------------------------------------------------------------------------------------------------------------------------------------------------------------------------------|
| 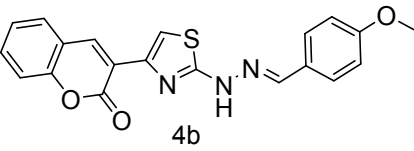 <p>4b</p> | Yellow solid, yield: 98%. mp: 241-242 °C. <sup>1</sup> H NMR (500MHz, d <sub>6</sub> -DMSO): δ 12.06 (brs, 1H, -NH), 8.53 (s, 1H, Thiazole H), 8.01 (s, 1H, -N=C-H), 7.85 (dd, J=10.0 Hz, J =2.0 Hz, 1H, arom H), 7.75 (s, 1H, Coumarin C <sub>4</sub> -H), 7.63-7.59 (m, 3H, arom H), 7.45 (d, J =10.5 Hz, 1H, arom H), 7.39 (td, J =9.5 Hz, J=1.0 Hz, 1H, arom H), 7.0 (d, J =11.0 Hz, 2H, arom H), 3.80 (s, 3H, -OCH <sub>3</sub> ). HRMS(ESI): Anal. Calcd. For C <sub>20</sub> H <sub>16</sub> O <sub>3</sub> N <sub>3</sub> S [M+H] <sup>+</sup> 378.0907; Found: 378.0915 |
|----------------------------------------------------------------------------------------------|----------------------------------------------------------------------------------------------------------------------------------------------------------------------------------------------------------------------------------------------------------------------------------------------------------------------------------------------------------------------------------------------------------------------------------------------------------------------------------------------------------------------------------------------------------------------------------|

**(E)-3-(2-(2-(4-hydroxybenzylidene)hydrazinyl)thiazol-4-yl)-2H-chromen-2-one (4c):**

|                                                                                               |                                                                                                                                                                                                                                                                                                                                                                                                                                                         |
|-----------------------------------------------------------------------------------------------|---------------------------------------------------------------------------------------------------------------------------------------------------------------------------------------------------------------------------------------------------------------------------------------------------------------------------------------------------------------------------------------------------------------------------------------------------------|
| 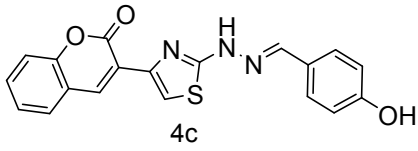 <p>4c</p> | Dark brown solid, yield: 96%. mp: 248-250 °C. <sup>1</sup> H NMR (500MHz, d <sub>6</sub> -DMSO): δ 11.94 (s, 1H NH), 8.54 (s, 1H, Thiazole H), 7.97 (s, 1H, -N=C-H), 7.85(dd, J=7.5 Hz, J=1.5 Hz, 1H, arom H), 7.74 (s, 1H, Coumarin C <sub>4</sub> -H), 7.63 (td, J =7.0 Hz, J =1.5 Hz, 1H, arom H), 7.50 (d, J = 8.5 Hz, 2H, arom H), 7.45 (d, J = 9.0 Hz, 1H, arom H), 7.39 (td, J = 8.0 Hz, J= 1.0 Hz, 1H, arom H), 6.82 (d, J=9.0 Hz, 2H, arom H). |
|-----------------------------------------------------------------------------------------------|---------------------------------------------------------------------------------------------------------------------------------------------------------------------------------------------------------------------------------------------------------------------------------------------------------------------------------------------------------------------------------------------------------------------------------------------------------|

**(E)-3-(2-(2-(3-hydroxybenzylidene)hydrazinyl)thiazol-4-yl)-2H-chromen-2-one (4d):**

|                                                                                               |                                                                                                                                                                                                                                                                                                                                                                                                                                                                                                                 |
|-----------------------------------------------------------------------------------------------|-----------------------------------------------------------------------------------------------------------------------------------------------------------------------------------------------------------------------------------------------------------------------------------------------------------------------------------------------------------------------------------------------------------------------------------------------------------------------------------------------------------------|
| 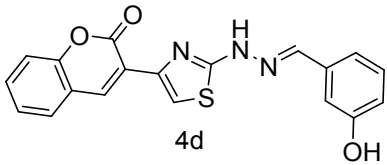 <p>4d</p> | Yellow solid, yield: 96%. mp: 250-252 °C. <sup>1</sup> H NMR (500MHz, d <sub>6</sub> -DMSO): δ 12.14 (s, 1H, -NH), 9.60 (brs, 1H, -OH), 8.53 (s, 1H, Thiazole H), 7.97 (s, 1H, -N=C-H), 7.85(d, J=8.0 Hz, 1H, arom H), 7.77 (s, 1H, Coumarin C <sub>4</sub> -H), 7.62 (td, J =8.5 Hz, J =1.5 Hz, 1H, arom H), 7.45 (d, J=8.0 Hz, 1H, arom H), 7.38 (t, J=7.5 Hz, 1H, arom H), 7.22 (t, J =8.0 Hz, 1H, arom H), 7.12 (s, 1H, arom H), 7.04 (d, J =8.0 Hz, 1H, arom H), 6.79 (dd, J=8.0 Hz, J=2.0 Hz 1H, arom H). |
|-----------------------------------------------------------------------------------------------|-----------------------------------------------------------------------------------------------------------------------------------------------------------------------------------------------------------------------------------------------------------------------------------------------------------------------------------------------------------------------------------------------------------------------------------------------------------------------------------------------------------------|

**(E)-3-(2-(2-(2-hydroxybenzylidene)hydrazinyl)thiazol-4-yl)-2H-chromen-2-one (4e):**

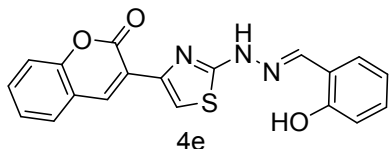

Yellow solid, yield: 94%. mp: 248-250 °C. <sup>1</sup>H NMR (500MHz, d<sub>6</sub>-DMSO): δ 12.06 (brs, 1H, -NH), 10.09 (brs, 1H, OH), 8.50 (s, 1H, Thiazole **H**), 8.36 (s, 1H, -N=C-**H**), 7.81(d, *J*=8.0 Hz, 1H, arom H), 7.73 (s, 1H, Coumarin C<sub>4</sub>-**H**), 7.62 (d, *J*=7.5 Hz, 1H, arom H), 7.58 (t, *J*=7.5 Hz, 1H, arom H), 7.41 (d, *J*=7.5 Hz, 1H, arom H), 7.35 (t, *J*=7.5 Hz, 1H, arom H), 7.21 (t, *J*=8.0 Hz, 1H, arom H), 6.91(d, *J*=8.5 Hz, 1H, arom H), 6.86 (t, *J*=7.5 Hz, 1H, arom H).

**(E)-3-(2-(2-(3-phenoxybenzylidene)hydrazinyl)thiazol-4-yl)-2H-chromen-2-one (4f):**

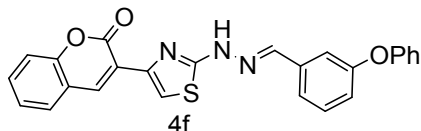

Yellow solid, yield: 95%. mp: 248-250 °C. <sup>1</sup>H NMR (500MHz, d<sub>6</sub>-DMSO): δ 12.25 (brs, 1H, -NH), 8.51 (s, 1H, Thiazole **H**), 8.03 (s, 1H, -N=C-**H**), 7.83 (dd, *J*=9.5 Hz, *J*=1.5 Hz, 1H, arom H), 7.75 (s, 1H, Coumarin C<sub>4</sub>-**H**), 7.62 (td, *J*=9.5 Hz, *J*=2.0 Hz, 1H, arom H), 7.46-7.41 (m, 5H, arom H), 7.38 (td, *J*=10.0 Hz, *J*=1.5 Hz, 1H, arom H), 7.28 (s, 1H, arom H), 7.18 (tt, *J*=9.0 Hz, *J*=1.5 Hz, 1H, arom H), 7.06 (dd, *J*=11 Hz, *J*=1.0 Hz, 2H, arom H), 7.01 (dt, *J*=9.5 Hz, *J*=2.5 Hz, 1H, arom H). HRMS(ESI): Anal. Calcd. For C<sub>25</sub>H<sub>18</sub>O<sub>3</sub>N<sub>3</sub>S [M+H]<sup>+</sup> 440.1063; Found: 440.1065.

**(E)-3-(2-(2-(4-nitrobenzylidene)hydrazinyl)thiazol-4-yl)-2H-chromen-2-one (4g):**

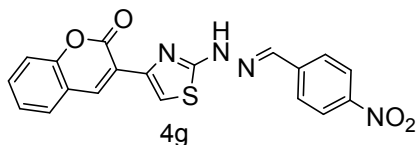

Orange solid, yield: 96%, mp: 236-238 °C. <sup>1</sup>H NMR (500MHz, d<sub>6</sub>-DMSO): δ 12.66 (brs, 1H, -NH), 8.55 (s, 1H, Thiazole **H**), 8.28 (d, *J*=9.0 Hz, 2H, arom H), 8.17 (s, 1H, -N=C-**H**), 7.91 (d, *J*=8.5 Hz, 2H, arom H), 7.87 (d, *J*=8.0 Hz, 1H, arom H), 7.84 (s, 1H, Coumarin C<sub>4</sub>-**H**), 7.64 (td, *J*=8.5 Hz, *J*=1.5 Hz, 1H, arom H), 7.46 (d, *J*=8.5 Hz, 1H, arom H), 7.40 (t, *J*=8.0 Hz, 1H, arom H).

**(E)-3-(2-(2-(3-chloro-4-hydroxybenzylidene)hydrazinyl)thiazol-4-yl)-2H-chromen-2-one (4i):**

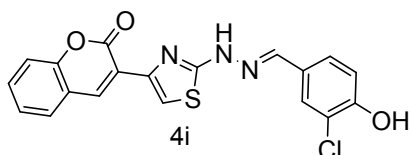

Yellow solid, yield: 93%, mp: 232-234 °C. <sup>1</sup>H NMR (500MHz, d<sub>6</sub>-DMSO): δ 12.26 (brs, 1H, -NH), 10.36 (s, 1H, -OH), 8.54 (s, 1H, Thiazole **H**), 8.29 (s, 1H, -N=C-**H**), 7.86 (dd, *J*=9.5 Hz, *J*=2.0 Hz, 1H, arom H), 7.78 (s, 1H, Coumarin C<sub>4</sub>-**H**), 7.65-7.61 (m, 2H, arom H), 7.45 (d, *J*=10.0 Hz, 1H, arom H), 7.39 (td, *J*=9.5

Hz,  $J=1.0$  Hz, 1H, arom H), 7.24 (dd,  $J=11.0$  Hz,  $J=3.5$  Hz, 1H, arom H), 6.92 (d,  $J=11.0$  Hz, 1H, arom H). HRMS (ESI): Anal. Calcd. For  $C_{19}H_{11}O_3N_3ClS[M-H]^+$  396.02; Found: 396.02.

**(E)-3-(2-(2-(3-bromo-4-hydroxybenzylidene)hydrazinyl)thiazol-4-yl)-2H-chromen-2-one (4j):**

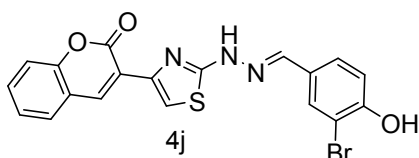

Yellow solid, yield: 92%, mp: 242-244 °C.  $^1H$  NMR (500MHz,  $d_6$ -DMSO):  $\delta$  12.28 (s, 1H, -NH), 10.40 (s, 1H, -OH), 8.54 (s, 1H, Thiazole **H**), 8.28 (s, 1H, -N=C-**H**), 7.86 (d,  $J=7.5$  Hz,  $J=1.5$  Hz, 1H, arom H), 7.78 (s, 1H, Coumarin C<sub>4</sub>-**H**), 7.76 (d,  $J=3.0$  Hz, 1H, arom H), 7.63 (td,  $J=7.5$  Hz,  $J=2.0$  Hz, 1H, arom H), 7.46 (d,  $J=8.0$  Hz, 1H, arom H), 7.39 (td,  $J=7.0$  Hz,  $J=1.0$  Hz, 1H, arom H), 7.36 (dd,  $J=9.0$  Hz,  $J=3.0$  Hz, 1H, arom H), 6.87 (d,  $J=8.5$  Hz, 1H, arom H). HRMS (ESI):  $[M-H]^+$ 441.2967.

**(E)-3-(2-(2-(4-hydroxy-3-methoxybenzylidene)hydrazinyl)thiazol-4-yl)-2H-chromen-2-one (4k):**

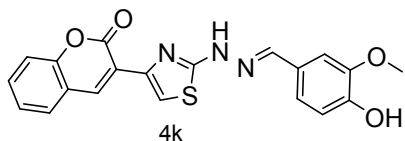

Dark yellow solid, yield: 96%. mp: 224-226 °C.  $^1H$  NMR (500MHz,  $d_6$ -DMSO):  $\delta$  12.05 (brs, 1H, -NH), 8.54 (s, 1H, Thiazole **H**), 7.97 (s, 1H, -N=C-**H**), 7.86 (d,  $J=9.5$  Hz, 1H, arom H), 7.75 (s, 1H, Coumarin C<sub>4</sub>-**H**), 7.63 (td,  $J=9.5$  Hz,  $J=2.0$  Hz, 1H, arom H), 7.46 (d,  $J=10.0$  Hz, 1H, arom H), 7.39 (t,  $J=9.0$  Hz, 1H, arom H), 7.25 (d,  $J=2.5$  Hz, 1H, arom H), 7.08 (dd,  $J=9.5$  Hz,  $J=2.0$  Hz, 1H, arom H), 6.83 (d,  $J=10.0$  Hz, 1H, arom H), 3.83 (s, 3H, -OCH<sub>3</sub>). HRMS (ESI): Anal. Calcd. For  $C_{20}H_{16}O_4N_3S[M+H]^+$  394.0856; Found: 394.0864.

**(E)-3-(2-(2-(2-hydroxy-5-methoxybenzylidene)hydrazinyl)thiazol-4-yl)-2H-chromen-2-one (4l):**

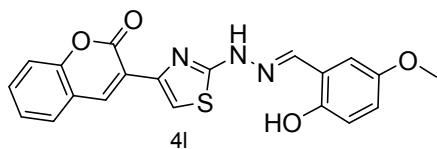

Light yellow solid, yield: 93%. mp: 245-247 °C.  $^1H$  NMR (500MHz,  $d_6$ -DMSO):  $\delta$  12.20 (s, 1H, -NH), 9.65 (s, 1H, -OH), 8.55 (s, 1H, Thiazole **H**), 8.32 (s, 1H, -N=C-**H**), 7.86 (dd,  $J=8.0$  Hz,  $J=1.5$  Hz, 1H, arom H), 7.77 (s, 1H, Coumarin C<sub>4</sub>-**H**), 7.63 (td,  $J=7.5$  Hz,  $J=1.5$  Hz, 1H, arom H), 7.46 (d,  $J=8.0$  Hz, 1H, arom H), 7.39 (td,  $J=8.0$  Hz,  $J=1.0$  Hz, 1H, arom H), 7.18 (d,  $J=2.5$  Hz, 1H, arom H), 6.87-6.82 (m, 2H, arom H), 3.72 (s, 3H, -OCH<sub>3</sub>). HRMS (ESI):  $[M+H]^+$ 394.0858.

**(E)-3-(2-(2-(2,4-dimethoxybenzylidene)hydrazinyl)thiazol-4-yl)-2H-chromen-2-one (4n):**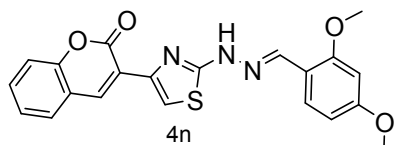

Brownish yellow solid, yield: 96%, mp: 242-244 °C. <sup>1</sup>H NMR (500MHz, d<sub>6</sub>-DMSO): δ 12.02 (brs, 1H, -NH), 8.54(s, 1H, Thiazole **H**), 8.31 (s, 1H, -N=C-**H**), 7.87 (d, *J*=10.0 Hz, 1H, arom H), 7.74 (s, 1H, Coumarin C<sub>4</sub>-**H**), 7.72 (d, *J*=11.0 Hz, 1H, arom H), 7.63 (td, *J*=11.0 Hz, *J*=2.0 Hz, 1H, arom H), 7.46 (d, *J*=10.5Hz, 1H, arom H), 7.39 (td, *J*=9.5 Hz, *J*=1.0 Hz, 1H, arom H), 6.64-6.62 (m, 2H, arom H), 3.86 (s, 3H, -OCH<sub>3</sub>), 3.82 (s, 3H, -OCH<sub>3</sub>). HRMS (ESI): [M+H]<sup>+</sup>408.1021.

**(E)-3-(2-(2-(2,5-dimethoxybenzylidene)hydrazinyl)thiazol-4-yl)-2H-chromen-2-one(4o):**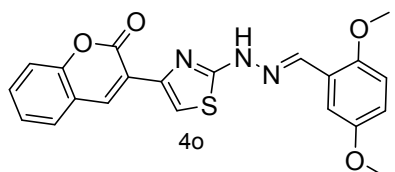

Yellow solid, yield: 95%. mp: 236-238 °C. <sup>1</sup>H NMR (500MHz, d<sub>6</sub>-DMSO): δ 12.18 (brs, 1H, -NH), 8.53 (s, 1H, Thiazole **H**), 8.33 (s, 1H, -N=C-**H**), 7.85 (dd, *J*=7.5 Hz, *J*=1.5 Hz, 1H, arom H), 7.76 (s, 1H, Coumarin C<sub>4</sub>-**H**), 7.62 (td, *J*=7.0 Hz, *J*=1.5 Hz, 1H, arom H), 7.44 (d, *J*=8.5Hz, 1H, arom H), 7.38 (td, *J*=7.5 Hz, *J*=1.0 Hz, 1H, arom H), 7.29 (d, *J*=3.0 Hz, 1H, arom H), 7.02 (d, *J*=9.0 Hz, 1H, arom H), 6.95 (dd, *J*=9.0 Hz, *J*=3.0 Hz, 1H, arom H), 3.80 (s, 3H, -OCH<sub>3</sub>), 3.75 (s, 3H, -OCH<sub>3</sub>). HRMS (ESI): [M+H]<sup>+</sup>408.1017.

**(E)-3-(2-(2-(3-ethoxy-2-hydroxybenzylidene)hydrazinyl)thiazol-4-yl)-2H-chromen-2-one (4p):**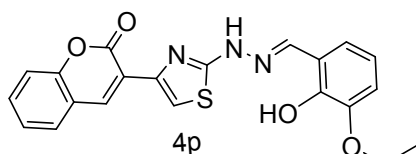

Yellow solid, yield: 93%, mp: 228-230 °C. <sup>1</sup>H NMR (500MHz, d<sub>6</sub>-DMSO): δ 12.16 (brs, 1H, -NH), 9.32 (brs, 1H, -OH), 8.55 (s, 1H, Thiazole **H**), 8.38 (s, 1H, -N=C-**H**), 7.86 (dd, *J*=8.0 Hz, *J*=1.5 Hz, 1H, arom H), 7.77 (s, 1H, Coumarin C<sub>4</sub>-**H**), 7.63 (td, *J*=7.5 Hz, *J*=1.5 Hz, 1H, arom H), 7.46 (d, *J*=8.0 Hz, 1H, arom H), 7.39 (td, *J*=7.5 Hz, *J*=1.0 Hz, 1H, arom H), 7.24 (dd, *J*=8.0 Hz, *J*=1.0 Hz, 1H, arom H), 6.97 (dd, *J*=8.0 Hz, *J*=1.5 Hz, 1H, arom H), 6.82 (t, *J*=8.0 Hz, 1H, arom H), 4.07 (q, *J*=7.0 Hz, 2H, -OCH<sub>2</sub>), 1.36 (t, *J*=7.0 Hz, 3H, -CH<sub>3</sub>). HRMS (ESI): [M+H]<sup>+</sup> 408.1011.

**(E)-3-(2-(2-(3-ethoxy-4-hydroxybenzylidene)hydrazinyl)thiazol-4-yl)-2H-chromen-2-one (4q):**

Off white solid, yield: 96%, mp: 265-267 °C. <sup>1</sup>H NMR (500MHz, d<sub>6</sub>-DMSO): δ 12.03 (brs, 1H, -NH), 8.53 (s, 1H, Thiazole **H**), 7.96 (s, 1H, -N=C-**H**), 7.86 (d, *J*=9.5

|                                                                                                                         |                                                                                                                                                                                                                                                                                                                                                                                                                                                                                                                                                                                    |
|-------------------------------------------------------------------------------------------------------------------------|------------------------------------------------------------------------------------------------------------------------------------------------------------------------------------------------------------------------------------------------------------------------------------------------------------------------------------------------------------------------------------------------------------------------------------------------------------------------------------------------------------------------------------------------------------------------------------|
| 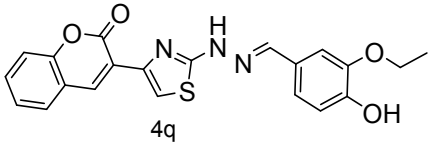 <p style="text-align: center;">4q</p> | <p>Hz, 1H, arom H), 7.75 (s, 1H, Coumarin C<sub>4</sub>-H), 7.63 (td, <i>J</i>=9.5 Hz, <i>J</i>=1.5 Hz, 1H, arom H), 7.46 (d, <i>J</i>=10.0 Hz, 1H, arom H), 7.39 (t, <i>J</i>=9.5 Hz, 1H, arom H), 7.23 (d, <i>J</i>=2.0 Hz, 1H, arom H), 7.07 (dd, <i>J</i>=10.0 Hz, <i>J</i>=2.0 Hz, 1H, arom H), 6.85 (d, <i>J</i>=10.5 Hz, 1H, arom H), 4.07 (q, <i>J</i>=9.0 Hz, 2H, -OCH<sub>2</sub>), 1.37 (t, <i>J</i>=9.0 Hz, 3H, -CH<sub>3</sub>). HRMS (ESI): Anal. Calcd. For C<sub>21</sub>H<sub>18</sub>O<sub>4</sub>N<sub>3</sub>S [M+H]<sup>+</sup>408.1013; Found: 408.1014.</p> |
|-------------------------------------------------------------------------------------------------------------------------|------------------------------------------------------------------------------------------------------------------------------------------------------------------------------------------------------------------------------------------------------------------------------------------------------------------------------------------------------------------------------------------------------------------------------------------------------------------------------------------------------------------------------------------------------------------------------------|

**(E)-3-(2-(2-(3,5-dibromobenzylidene)hydrazinyl)thiazol-4-yl)-2H-chromen-2-one (4r):**

|                                                                                                                         |                                                                                                                                                                                                                                                                                                                                                                                      |
|-------------------------------------------------------------------------------------------------------------------------|--------------------------------------------------------------------------------------------------------------------------------------------------------------------------------------------------------------------------------------------------------------------------------------------------------------------------------------------------------------------------------------|
| 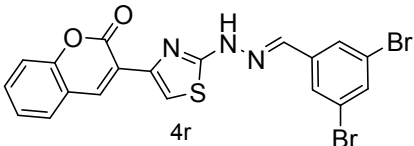 <p style="text-align: center;">4r</p> | <p>Yellow solid, yield: 90%, mp: 248-250 °C. <sup>1</sup>H NMR (500MHz, d<sub>6</sub>-DMSO): δ 10.79 (brs, 1H, -NH), 8.55 (s, 1H, Thiazole H), 8.28 (s, 1H, -N=C-H), 7.86 (dd, <i>J</i>=9.5 Hz, <i>J</i>=1.5 Hz, 1H, arom H), 7.82 (s, 1H, Coumarin C<sub>4</sub>-H), 7.77 (s, 2H, arom H), 7.64 (td, <i>J</i>=10.5 Hz, <i>J</i>=2.0 Hz, 1H, arom H), 7.51-7.38 (m, 3H, arom H).</p> |
|-------------------------------------------------------------------------------------------------------------------------|--------------------------------------------------------------------------------------------------------------------------------------------------------------------------------------------------------------------------------------------------------------------------------------------------------------------------------------------------------------------------------------|

**(3-(2-((E)-2-((E)-3-phenylallylidene)hydrazinyl)thiazol-4-yl)-2H-chromen-2-one(4t):**

|                                                                                                                           |                                                                                                                                                                                                                                                                                                                                                                                                                                                                                                                                                                                                       |
|---------------------------------------------------------------------------------------------------------------------------|-------------------------------------------------------------------------------------------------------------------------------------------------------------------------------------------------------------------------------------------------------------------------------------------------------------------------------------------------------------------------------------------------------------------------------------------------------------------------------------------------------------------------------------------------------------------------------------------------------|
| 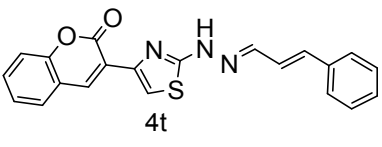 <p style="text-align: center;">4t</p> | <p>Yellow solid, yield: 96%. mp: 245-247 °C. <sup>1</sup>H NMR (500MHz, d<sub>6</sub>-DMSO): δ 12.14 (s, 1H, -NH), 8.50 (s, 1H, Thiazole H), 7.89 (d, <i>J</i>=10.0 Hz, 1H, -N=C-H), 7.82 (dd, <i>J</i>=9.5 Hz, <i>J</i>=1.5 Hz, 1H, arom H), 7.74 (s, 1H, Coumarin C<sub>4</sub>-H), 7.63-7.58 (m, 3H, arom H), 7.43 (d, <i>J</i>=10.0 Hz, 1H, arom H), 7.39-7.34 (m, 3H, arom H), 7.29 (tt, <i>J</i>=9.0 Hz, <i>J</i>=3.0 Hz, 1H, arom H), 6.98-6.95 (m, 2H). HRMS (ESI): Anal. Calcd. For C<sub>21</sub>H<sub>16</sub>O<sub>2</sub>N<sub>3</sub>S [M+H]<sup>+</sup> 374.0958; Found: 374.0965.</p> |
|---------------------------------------------------------------------------------------------------------------------------|-------------------------------------------------------------------------------------------------------------------------------------------------------------------------------------------------------------------------------------------------------------------------------------------------------------------------------------------------------------------------------------------------------------------------------------------------------------------------------------------------------------------------------------------------------------------------------------------------------|

**(E)-3-(2-(2-(naphthalen-2-ylmethylene)hydrazinyl)thiazol-4-yl)-2H-chromen-2-one(4u):**

|                                                                                                                           |                                                                                                                                                                                                                                                                                                                                                                                                                                                                                                                                                            |
|---------------------------------------------------------------------------------------------------------------------------|------------------------------------------------------------------------------------------------------------------------------------------------------------------------------------------------------------------------------------------------------------------------------------------------------------------------------------------------------------------------------------------------------------------------------------------------------------------------------------------------------------------------------------------------------------|
| 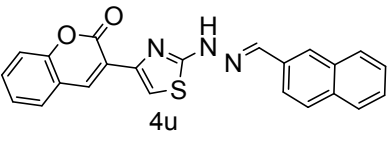 <p style="text-align: center;">4u</p> | <p>Off-white solid, yield: 95%, mp: 254-256 °C. <sup>1</sup>H NMR (500MHz, d<sub>6</sub>-DMSO): δ 12.33 (brs, 1H, -NH), 8.55 (s, 1H, Thiazole H), 8.23 (s, 1H, -N=C-H), 8.06 (s, 1H, arom H), 7.98-7.91 (m, 4H, arom H), 7.86 (dd, <i>J</i>=10.0 Hz, <i>J</i>=2.0 Hz, 1H, arom H), 7.81 (s, 1H, Coumarin C<sub>4</sub>-H), 7.63 (td, <i>J</i>=9.5 Hz, <i>J</i>=2.0 Hz, 1H, arom H), 7.58-7.52 (m, 2H, arom H), 7.46 (d, <i>J</i>=10.5 Hz, 1H, arom H), 7.40 (td, <i>J</i>=9.5 Hz, <i>J</i>=1.0 Hz, 1H, arom H). HRMS (ESI): [M+H]<sup>+</sup>398.0954.</p> |
|---------------------------------------------------------------------------------------------------------------------------|------------------------------------------------------------------------------------------------------------------------------------------------------------------------------------------------------------------------------------------------------------------------------------------------------------------------------------------------------------------------------------------------------------------------------------------------------------------------------------------------------------------------------------------------------------|

**(E)-3-(2-(2-((4-methylthiazol-5-yl)methylene)hydrazinyl)thiazol-4-yl)-2H-chromen-2-one (4v):**

|                                                                                   |                                                                                                                                                                                                                                                                                                                                                                                                                                                                                                                                      |
|-----------------------------------------------------------------------------------|--------------------------------------------------------------------------------------------------------------------------------------------------------------------------------------------------------------------------------------------------------------------------------------------------------------------------------------------------------------------------------------------------------------------------------------------------------------------------------------------------------------------------------------|
| 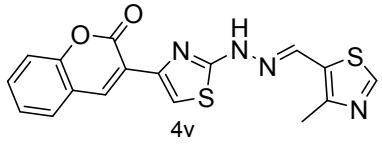 | Yellow solid, yield: 95%. mp: 242-244 °C. <sup>1</sup> H NMR (500MHz, d <sub>6</sub> -DMSO): δ 12.22 (s, 1H, -NH), 9.0 (s, 1H, Thiazole-H), 8.53 (s, 1H, Thiazole H), 8.29 (s, 1H, -N=C-H), 7.86 (dd, <i>J</i> =9.5 Hz, <i>J</i> =1.5 Hz, 1H, arom H), 7.77 (s, 1H, Coumarin C <sub>4</sub> -H), 7.63 (td, <i>J</i> =9.0 Hz, <i>J</i> =2.0 Hz, 1H, arom H), 7.46 (d, <i>J</i> =10.5 Hz, 1H, arom H), 7.39 (td, <i>J</i> =9.5 Hz, <i>J</i> =1.5 Hz, 1H, arom H), 2.08 (s, 3H, -CH <sub>3</sub> ). LCMS (ESI): [M+H] <sup>+</sup> 369. |
|-----------------------------------------------------------------------------------|--------------------------------------------------------------------------------------------------------------------------------------------------------------------------------------------------------------------------------------------------------------------------------------------------------------------------------------------------------------------------------------------------------------------------------------------------------------------------------------------------------------------------------------|

**(E)-3-(2-(2-((2-aminopyridin-3-yl)methylene)hydrazinyl)thiazol-4-yl)-2H-chromen-2-one (4w):**

|                                                                                   |                                                                                                                                                                                                                                                                                                                                                                                                                                                                                                                                                                                                                                                  |
|-----------------------------------------------------------------------------------|--------------------------------------------------------------------------------------------------------------------------------------------------------------------------------------------------------------------------------------------------------------------------------------------------------------------------------------------------------------------------------------------------------------------------------------------------------------------------------------------------------------------------------------------------------------------------------------------------------------------------------------------------|
| 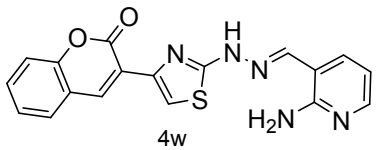 | Light brownish yellow solid, yield: 93%. mp: 246-248 °C. <sup>1</sup> H NMR (500MHz, d <sub>6</sub> -DMSO): δ 12.64 (s, 1H, -NH), 8.57 (s, 1H, Thiazole H), 8.34 (brs, 1H, NH <sub>2</sub> ), 8.26 (s, 1H, -N=C-H), 8.17 (d, <i>J</i> =9.0 Hz, 1H, arom H), 8.07 (dd, <i>J</i> =7.5 Hz, <i>J</i> =2.0 Hz, 1H, arom H), 7.88-7.86 (m, 2H, Coumarin C <sub>4</sub> -H & 1H, arom H), 7.65 (td, <i>J</i> =10.5 Hz, <i>J</i> =2.0 Hz, 1H, arom H), 7.46 (d, <i>J</i> =10.5 Hz, 1H, arom H), 7.40 (td, <i>J</i> =10.0 Hz, <i>J</i> =1.0 Hz, 1H, arom H), 7.02 (td, <i>J</i> =7.5Hz, <i>J</i> =1.5Hz, 1H, arom H). LCMS (ESI): [M+H] <sup>+</sup> 364. |
|-----------------------------------------------------------------------------------|--------------------------------------------------------------------------------------------------------------------------------------------------------------------------------------------------------------------------------------------------------------------------------------------------------------------------------------------------------------------------------------------------------------------------------------------------------------------------------------------------------------------------------------------------------------------------------------------------------------------------------------------------|

**(E)-3-(2-(2-((2-chloro-8-methylquinolin-3-yl)methylene)hydrazinyl)thiazol-4-yl)-2H-chromen-2-one (4x):**

|                                                                                     |                                                                                                                                                                                                                                                                                                                                                                                                                                                                                                                                                                                                                                                      |
|-------------------------------------------------------------------------------------|------------------------------------------------------------------------------------------------------------------------------------------------------------------------------------------------------------------------------------------------------------------------------------------------------------------------------------------------------------------------------------------------------------------------------------------------------------------------------------------------------------------------------------------------------------------------------------------------------------------------------------------------------|
| 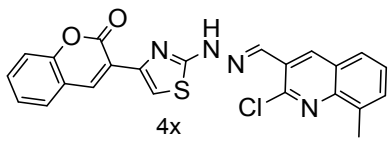 | Yellow solid, yield: 92%, mp: 248-250°C. <sup>1</sup> H NMR (500MHz, d <sub>6</sub> -DMSO): δ 12.64 (s, 1H, -NH), 8.79 (s, 1H, arom H), 8.56(s, 1H, Thiazole H), 8.50 (s, 1H, -N=C-H), 8.02 (d, <i>J</i> =10.5 Hz, 1H, arom H), 7.87(dd, <i>J</i> =10.0 <i>J</i> =2.0 Hz, 1H, arom H), 7.85(s, 1H, Coumarin C <sub>4</sub> -H), 7.69 (d, <i>J</i> =8.5 Hz, 1H, arom H), 7.64 (td, <i>J</i> =10.5 Hz, <i>J</i> =1.5 Hz, 1H, arom H), 7.57 (t, <i>J</i> =10.0 Hz, 1H, arom H), 7.46 (d, <i>J</i> =10.0 Hz, 1H, arom H), 7.40(td, <i>J</i> =9.5 Hz, <i>J</i> =1.0 Hz, 1H, arom H), 2.66 (s, 3H, -CH <sub>3</sub> ). LCMS (ESI): [M+H] <sup>+</sup> 447. |
|-------------------------------------------------------------------------------------|------------------------------------------------------------------------------------------------------------------------------------------------------------------------------------------------------------------------------------------------------------------------------------------------------------------------------------------------------------------------------------------------------------------------------------------------------------------------------------------------------------------------------------------------------------------------------------------------------------------------------------------------------|

**(E)-3-(2-(2-(1-phenylethylidene)hydrazinyl)thiazol-4-yl)-2H-chromen-2-one (4y):**

|  |                                                                                                                                                                                                                                                                                                                              |
|--|------------------------------------------------------------------------------------------------------------------------------------------------------------------------------------------------------------------------------------------------------------------------------------------------------------------------------|
|  | Light yellow solid, yield: 97%, mp: 226-228 °C. <sup>1</sup> H NMR (500MHz, d <sub>6</sub> -DMSO): δ 11.34 (brs, 1H, NH), 8.59 (s, 1H, Thiazole H), 7.83 (d, <i>J</i> =8.0 Hz, 1H, arom H), 7.80-7.78 (m, 3H, Coumarin C <sub>4</sub> -H & 2H, arom H), 7.64 (td, <i>J</i> =8.5 Hz, <i>J</i> =1.5 Hz, 1H, arom H), 7.47-7.38 |
|--|------------------------------------------------------------------------------------------------------------------------------------------------------------------------------------------------------------------------------------------------------------------------------------------------------------------------------|



|                                                                                                                         |                                                                                                                                                                                         |
|-------------------------------------------------------------------------------------------------------------------------|-----------------------------------------------------------------------------------------------------------------------------------------------------------------------------------------|
| 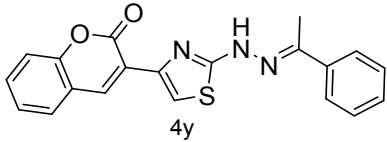 <p style="text-align: center;">4y</p> | <p>(m, 5H, arom H), 2.34 (s, 3H, -CH<sub>3</sub>). HRMS (ESI): Anal. Calcd. For C<sub>20</sub>H<sub>16</sub>O<sub>2</sub>N<sub>3</sub>S[M+H]<sup>+</sup> 362.0958; Found: 362.0968.</p> |
|-------------------------------------------------------------------------------------------------------------------------|-----------------------------------------------------------------------------------------------------------------------------------------------------------------------------------------|

**(E)-3-(2-(2-(1-(p-tolyl)ethylidene)hydrazinyl)thiazol-4-yl)-2H-chromen-2-one (4z):**

|                                                                                                                         |                                                                                                                                                                                                                                                                                                                                                                                                                                                                                                                                                                                                               |
|-------------------------------------------------------------------------------------------------------------------------|---------------------------------------------------------------------------------------------------------------------------------------------------------------------------------------------------------------------------------------------------------------------------------------------------------------------------------------------------------------------------------------------------------------------------------------------------------------------------------------------------------------------------------------------------------------------------------------------------------------|
| 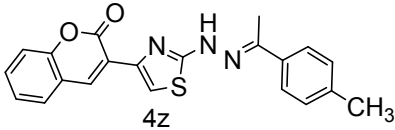 <p style="text-align: center;">4z</p> | <p>Yellow solid, yield: 95%. mp: 218-220 °C. <sup>1</sup>H NMR (500MHz, d<sub>6</sub>-DMSO): δ 11.27 (s, 1H, -NH), 8.58 (s, 1H, Thiazole H), 7.83 (d, J=8.0 Hz, 1H, arom H), 7.78 (s, 1H, Coumarin C<sub>4</sub>-H), 7.68 (d, J=8.5 Hz, 2H, arom H), 7.63 (td, J=7.0 Hz, J=1.5 Hz, 1H, arom H), 7.46 (d, J=8.5 Hz, 1H, arom H), 7.39 (td, J=7.5 Hz, J=1.0 Hz, 1H, arom H), 7.23 (d, J=8.0 Hz, 2H, arom H), 2.33 (s, 3H, -CH<sub>3</sub>), 2.31 (s, 3H, -CH<sub>3</sub>). HRMS (ESI): Anal. Calcd. For C<sub>21</sub>H<sub>18</sub>O<sub>2</sub>N<sub>3</sub>S [M+H]<sup>+</sup> 376.1114; Found: 376.1129</p> |
|-------------------------------------------------------------------------------------------------------------------------|---------------------------------------------------------------------------------------------------------------------------------------------------------------------------------------------------------------------------------------------------------------------------------------------------------------------------------------------------------------------------------------------------------------------------------------------------------------------------------------------------------------------------------------------------------------------------------------------------------------|

**(E)-3-(2-(2-(1-(4-methoxyphenyl)ethylidene)hydrazinyl)thiazol-4-yl)-2H-chromen-2-one (4aa):**

|                                                                                                                            |                                                                                                                                                                                                                                                                                                                                                                                                                                                                                                                                                                                                                                    |
|----------------------------------------------------------------------------------------------------------------------------|------------------------------------------------------------------------------------------------------------------------------------------------------------------------------------------------------------------------------------------------------------------------------------------------------------------------------------------------------------------------------------------------------------------------------------------------------------------------------------------------------------------------------------------------------------------------------------------------------------------------------------|
| 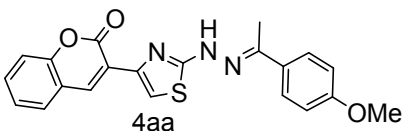 <p style="text-align: center;">4aa</p> | <p>Pale yellow solid, yield: 96%, mp: 240-242 °C. <sup>1</sup>H NMR (500MHz, d<sub>6</sub>-DMSO): δ 11.22 (brs, 1H, -NH), 8.56 (s, 1H, Thiazole H), 7.81 (dd, J=9.5 Hz, J=1.5 Hz, 1H, arom H), 7.75 (s, 1H, Coumarin C<sub>4</sub>-H), 7.73 (d, J=11.0 Hz, 2H, arom H), 7.62 (td, J=9.5 Hz, J=2.0 Hz, 1H, arom H), 7.44 (d, J=10.5 Hz, 1H, arom H), 7.38 (td, J=9.5 Hz, J=1.0 Hz, 1H, arom H), 6.97 (d, J=11.5 Hz, 1H, arom H), 3.78 (s, 3H, -OCH<sub>3</sub>), 2.3 (s, 3H, -CH<sub>3</sub>). HRMS (ESI): Anal. Calcd. For C<sub>21</sub>H<sub>18</sub>O<sub>3</sub>N<sub>3</sub>S [M+H]<sup>+</sup> 392.1063; Found: 392.1077</p> |
|----------------------------------------------------------------------------------------------------------------------------|------------------------------------------------------------------------------------------------------------------------------------------------------------------------------------------------------------------------------------------------------------------------------------------------------------------------------------------------------------------------------------------------------------------------------------------------------------------------------------------------------------------------------------------------------------------------------------------------------------------------------------|

**(E)-3-(2-(2-(1-(3-methoxyphenyl)ethylidene)hydrazinyl)thiazol-4-yl)-2H-chromen-2-one (4ab):**

|                                                                                                                            |                                                                                                                                                                                                                                                                                                                                                                                                                                                                                                                          |
|----------------------------------------------------------------------------------------------------------------------------|--------------------------------------------------------------------------------------------------------------------------------------------------------------------------------------------------------------------------------------------------------------------------------------------------------------------------------------------------------------------------------------------------------------------------------------------------------------------------------------------------------------------------|
| 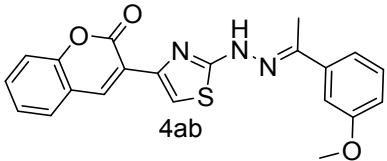 <p style="text-align: center;">4ab</p> | <p>Yellow solid, yield: 95%, mp: 240-242 °C. <sup>1</sup>H NMR (500MHz, d<sub>6</sub>-DMSO): δ 11.35 (brs, 1H, -NH), 8.57 (s, 1H, Thiazole H), 7.82 (dd, J=7.5 Hz, J=1.0 Hz, 1H, arom H), 7.78 (s, 1H, Coumarin C<sub>4</sub>-H), 7.63 (td, J=8.5 Hz, J=1.5 Hz, 1H, arom H), 7.45 (d, J=8.0 Hz, 1H, arom H), 7.39 (t, J=7.5 Hz, 1H, arom H), 7.35-7.32 (m, 3H, arom H), 6.96 (dt, J=7.0 Hz, J=2.0 Hz, 1H, arom H), 3.80 (s, 3H, -OCH<sub>3</sub>), 2.32 (s, 3H, -CH<sub>3</sub>). LCMS (ESI): [M+H]<sup>+</sup> 392.</p> |
|----------------------------------------------------------------------------------------------------------------------------|--------------------------------------------------------------------------------------------------------------------------------------------------------------------------------------------------------------------------------------------------------------------------------------------------------------------------------------------------------------------------------------------------------------------------------------------------------------------------------------------------------------------------|

**(E)-3-(2-(2-(1-(4-hydroxyphenyl)ethylidene)hydrazinyl)thiazol-4-yl)-2H-chromen-2-one (4ac):**

|                                                                                   |                                                                                                                                                                                                                                                                                                                                                                                                                                                                                                                                                                                                                                 |
|-----------------------------------------------------------------------------------|---------------------------------------------------------------------------------------------------------------------------------------------------------------------------------------------------------------------------------------------------------------------------------------------------------------------------------------------------------------------------------------------------------------------------------------------------------------------------------------------------------------------------------------------------------------------------------------------------------------------------------|
| 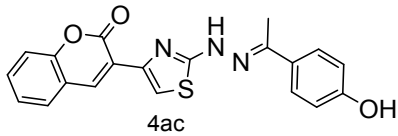 | Brownish yellow solid, yield: 96%, mp: 248-250 °C. <sup>1</sup> H NMR (500MHz, d <sub>6</sub> -DMSO): δ 11.14 (brs, 1H, -NH), 8.58 (s, 1H, Thiazole H), 7.82 (dd, <i>J</i> =7.5 Hz, <i>J</i> =1.0 Hz 1H, arom H), 7.76 (s, 1H, Coumarin C <sub>4</sub> -H), 7.65-7.61 (m, 3H, arom H), 7.46 (d, <i>J</i> =8.5 Hz, 1H, arom H), 7.39 (td, <i>J</i> =8.0 Hz, <i>J</i> =1.0 Hz, 1H, arom H), 6.80 (d, <i>J</i> =9.0 Hz, <i>J</i> =3.0 Hz, 2H, arom H), 2.27 (s, 3H, -CH <sub>3</sub> ). HRMS (ESI): Anal. Calcd. For C <sub>20</sub> H <sub>16</sub> O <sub>3</sub> N <sub>3</sub> S [M+H] <sup>+</sup> 378.0907; Found: 378.0919. |
|-----------------------------------------------------------------------------------|---------------------------------------------------------------------------------------------------------------------------------------------------------------------------------------------------------------------------------------------------------------------------------------------------------------------------------------------------------------------------------------------------------------------------------------------------------------------------------------------------------------------------------------------------------------------------------------------------------------------------------|

**(E)-3-(2-(2-(1-(3-hydroxyphenyl)ethylidene)hydrazinyl)thiazol-4-yl)-2H-chromen-2-one (4ad):**

|                                                                                    |                                                                                                                                                                                                                                                                                                                                                                                                                                                                                                                                                                                                                                                                                    |
|------------------------------------------------------------------------------------|------------------------------------------------------------------------------------------------------------------------------------------------------------------------------------------------------------------------------------------------------------------------------------------------------------------------------------------------------------------------------------------------------------------------------------------------------------------------------------------------------------------------------------------------------------------------------------------------------------------------------------------------------------------------------------|
| 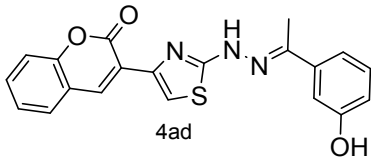 | Yellow solid, yield: 94%, mp: 248-250 °C. <sup>1</sup> H NMR (500MHz, d <sub>6</sub> -DMSO): δ 11.29 (brs, 1H, -NH), 8.58 (s, 1H, Thiazole H), 7.83 (dd, <i>J</i> =7.5 Hz, <i>J</i> =1.5 Hz, 1H, arom H), 7.79 (s, 1H, Coumarin C <sub>4</sub> -H), 7.63 (td, <i>J</i> =7.0 Hz, <i>J</i> =1.5 Hz, 1H, arom H), 7.46 (d, <i>J</i> =8.5 Hz, 1H, arom H), 7.40 (td, <i>J</i> =7.5 Hz, <i>J</i> =1.0 Hz, 1H, arom H), 7.23-7.18(m, 3H, arom H), 6.78 (dt, <i>J</i> =6.5 Hz, <i>J</i> =2.5 Hz, 1H, arom H), 2.29 (s, 3H, -CH <sub>3</sub> ). HRMS (ESI): Anal. Calcd. For C <sub>20</sub> H <sub>16</sub> O <sub>3</sub> N <sub>3</sub> S [M+H] <sup>+</sup> 378.0907; Found: 378.0920. |
|------------------------------------------------------------------------------------|------------------------------------------------------------------------------------------------------------------------------------------------------------------------------------------------------------------------------------------------------------------------------------------------------------------------------------------------------------------------------------------------------------------------------------------------------------------------------------------------------------------------------------------------------------------------------------------------------------------------------------------------------------------------------------|

**(E)-3-(2-(2-(1-(4-bromophenyl)ethylidene)hydrazinyl)thiazol-4-yl)-2H-chromen-2-one (4ae):**

|                                                                                     |                                                                                                                                                                                                                                                                                                                                                                                                                                      |
|-------------------------------------------------------------------------------------|--------------------------------------------------------------------------------------------------------------------------------------------------------------------------------------------------------------------------------------------------------------------------------------------------------------------------------------------------------------------------------------------------------------------------------------|
| 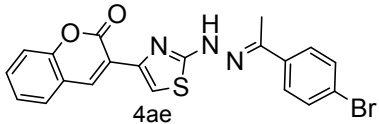 | Yellow solid, yield: 93%, mp: 240-242 °C. <sup>1</sup> H NMR (500MHz, d <sub>6</sub> -DMSO): δ 11.45 (brs, 1H, -NH), 8.33 (s, 1H, Thiazole H), 7.84-7.81 (m, 1H, arom H), 7.74-7.65 (m, 4H, Coumarin C <sub>4</sub> -H & 3H, arom H), 7.62 (d, <i>J</i> =10.5 Hz, 2H, arom H), 7.47 (d, <i>J</i> =10.0 Hz, 1H, arom H), 7.41 (t, <i>J</i> =9.5 Hz, 1H, arom H), 2.29 (s, 3H, -CH <sub>3</sub> ). LCMS (ESI): [M+H] <sup>+</sup> 441. |
|-------------------------------------------------------------------------------------|--------------------------------------------------------------------------------------------------------------------------------------------------------------------------------------------------------------------------------------------------------------------------------------------------------------------------------------------------------------------------------------------------------------------------------------|

**(E)-3-(2-(2-(1-(4-fluorophenyl)ethylidene)hydrazinyl)thiazol-4-yl)-2H-chromen-2-one (4af):**

|                                                                                     |                                                                                                                                                                                                                                                                                                                                                                                                                                                                         |
|-------------------------------------------------------------------------------------|-------------------------------------------------------------------------------------------------------------------------------------------------------------------------------------------------------------------------------------------------------------------------------------------------------------------------------------------------------------------------------------------------------------------------------------------------------------------------|
| 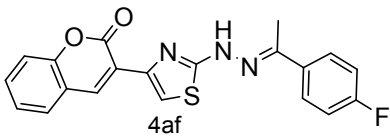 | Light yellow solid, yield: 95%, mp: 234-236 °C. <sup>1</sup> H NMR (500MHz, d <sub>6</sub> -DMSO): δ 11.32 (brs, 1H, -NH), 8.58 (s, 1H, Thiazole H), 7.85-7.81 (m, 3H, arom H), 7.78 (s, 1H, Coumarin C <sub>4</sub> -H), 7.63 (td, <i>J</i> =9.5 Hz, <i>J</i> =2.0 Hz, 1H, arom H), 7.46 (d, <i>J</i> =10.0 Hz, 1H, arom H), 7.39 (td, <i>J</i> =9.5 Hz, <i>J</i> =1.0 Hz, 1H, arom H), 7.26 (t, <i>J</i> =11.0 Hz, 2H, arom H), 2.33 (s, 3H, -CH <sub>3</sub> ). LCMS |
|-------------------------------------------------------------------------------------|-------------------------------------------------------------------------------------------------------------------------------------------------------------------------------------------------------------------------------------------------------------------------------------------------------------------------------------------------------------------------------------------------------------------------------------------------------------------------|

(ESI): [M+H]<sup>+</sup> 380.

**(E)-3-(2-(2-(1-(4-nitrophenyl)ethylidene)hydrazinyl)thiazol-4-yl)-2H-chromen-2-one (4ag):**

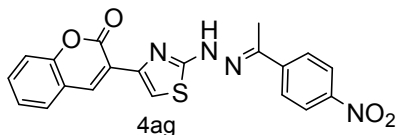

Orange yellow solid, yield: 94%, mp: 260-262 °C. <sup>1</sup>H NMR (500MHz, d<sub>6</sub>-DMSO): δ 11.68 (s, 1H, -NH), 8.59 (s, 1H, Thiazole **H**), 8.28 (d, *J*=9.0 Hz, 2H, arom H), 8.03(d, *J*=9.0 Hz, 2H, arom H), 7.85-7.82(m, 2H, Coumarin C<sub>4</sub>-**H** & 1H, arom H), 7.64 (td, *J*=9.0 Hz, *J*=1.5 Hz, 1H, arom H), 7.47 (d, *J*=8.5 Hz, 1H, arom H), 7.40 (td, *J*=8.5 Hz, *J*=1.0 Hz, 1H, arom H), 2.40 (s, 3H, -CH<sub>3</sub>). LCMS (ESI): [M+H]<sup>+</sup> 407.

**(E)-3-(2-(2-(1-(naphthalen-2-yl)ethylidene)hydrazinyl)thiazol-4-yl)-2H-chromen-2-one (4aj):**

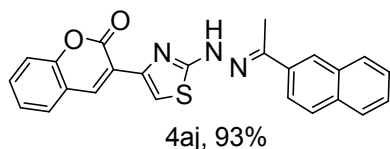

Brownish Yellow solid, yield: 93%, mp: 254-256°C. <sup>1</sup>H NMR (500MHz, d<sub>6</sub>-DMSO): δ 11.64 (brs, 1H, -NH), 8.61 (s, 1H, Thiazole **H**), 8.23 (s, 1H, arom H), 8.10 (dd, *J*=10.5 Hz, *J*=2.0 Hz, 1H, arom H), 7.99 (d, *J*=11.5 Hz, 1H, arom H), 7.93 (d, *J*=10.5 Hz, 1H, arom H), 7.82 (s, 1H, Coumarin C<sub>4</sub>-**H**), 7.63 (d, *J*=10.5 Hz, 1H, arom H), 7.54 (t, *J*=5.0 Hz, 1H, arom H), 7.47 (d, *J*=11.5 Hz, 2H, arom H), 7.43-7.36 (m, 3H, arom H), 2.47 (s, 3H, -CH<sub>3</sub>).

**(E)-3-(2-(2-(1-(2-oxo-4a,8a-dihydro-2H-chromen-3-yl)ethylidene)hydrazinyl)thiazol-4-yl)-2H-chromen-2-one (4ak):**

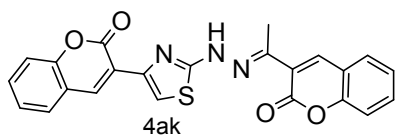

Yellow solid, yield: 91%, mp: 252-254°C. <sup>1</sup>H NMR (500MHz, d<sub>6</sub>-DMSO): δ 11.47 (s, 1H, -NH), 8.60 (s, 1H, Thiazole **H**), 8.19 (s, 1H, Coumarin **H**), 7.88 (dd, *J*=8.0 Hz, *J*=1.5 Hz, 1H, arom H), 7.83 (dd, *J*=7.5Hz, *J*=1.0 Hz, 1H, arom H), 7.80 (s, 1H, Coumarin C<sub>4</sub>-**H**), 7.67-7.62 (m, 2H, arom H), 7.46 (t, *J*=9.0 Hz, 2H, arom H), 7.42-7.37 (m, 2H, arom H), 2.29 (s, 3H, -CH<sub>3</sub>). HRMS (ESI): Anal. Calcd. For C<sub>23</sub>H<sub>16</sub>O<sub>4</sub>N<sub>3</sub>S [M-H]<sup>+</sup> 430.0856; Found: 430.0872.

Copies of <sup>1</sup>H NMR spectra of synthesized compounds (4a-4ak)

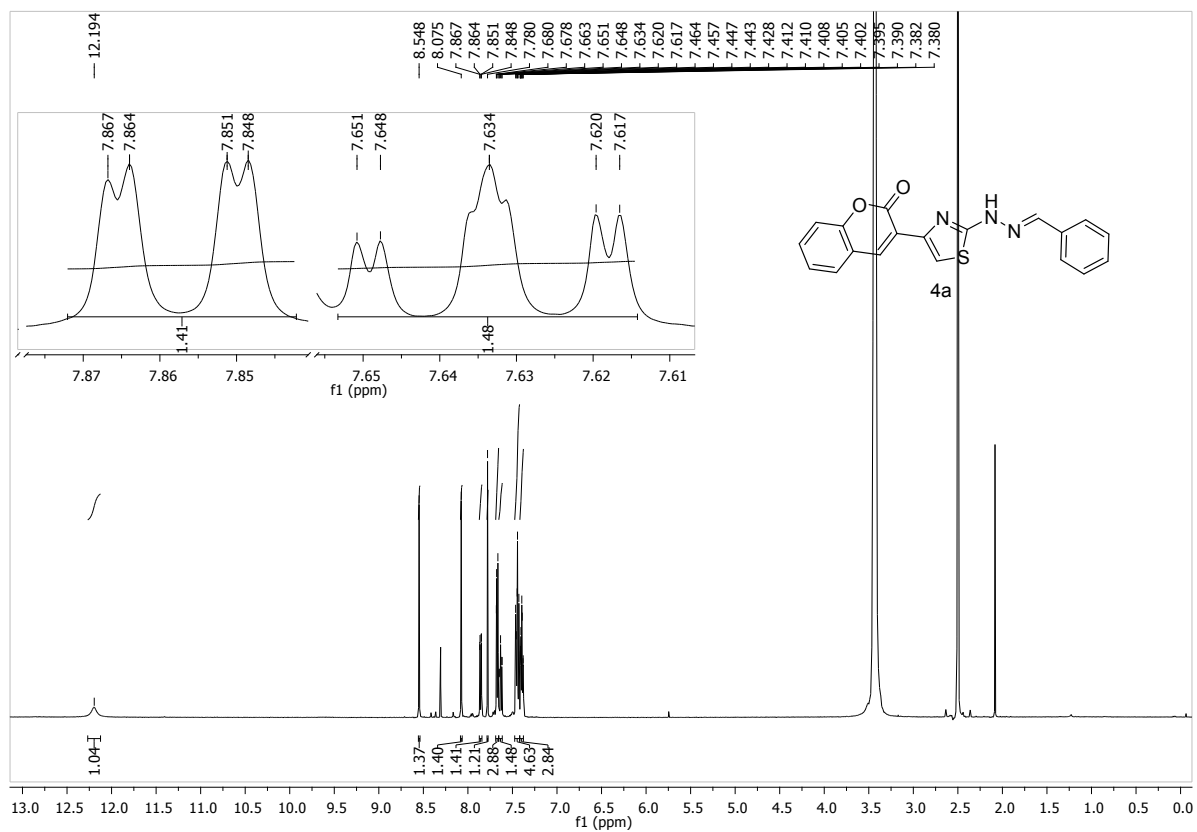

Figure S1-1. <sup>1</sup>H NMR Spectrum of 4a

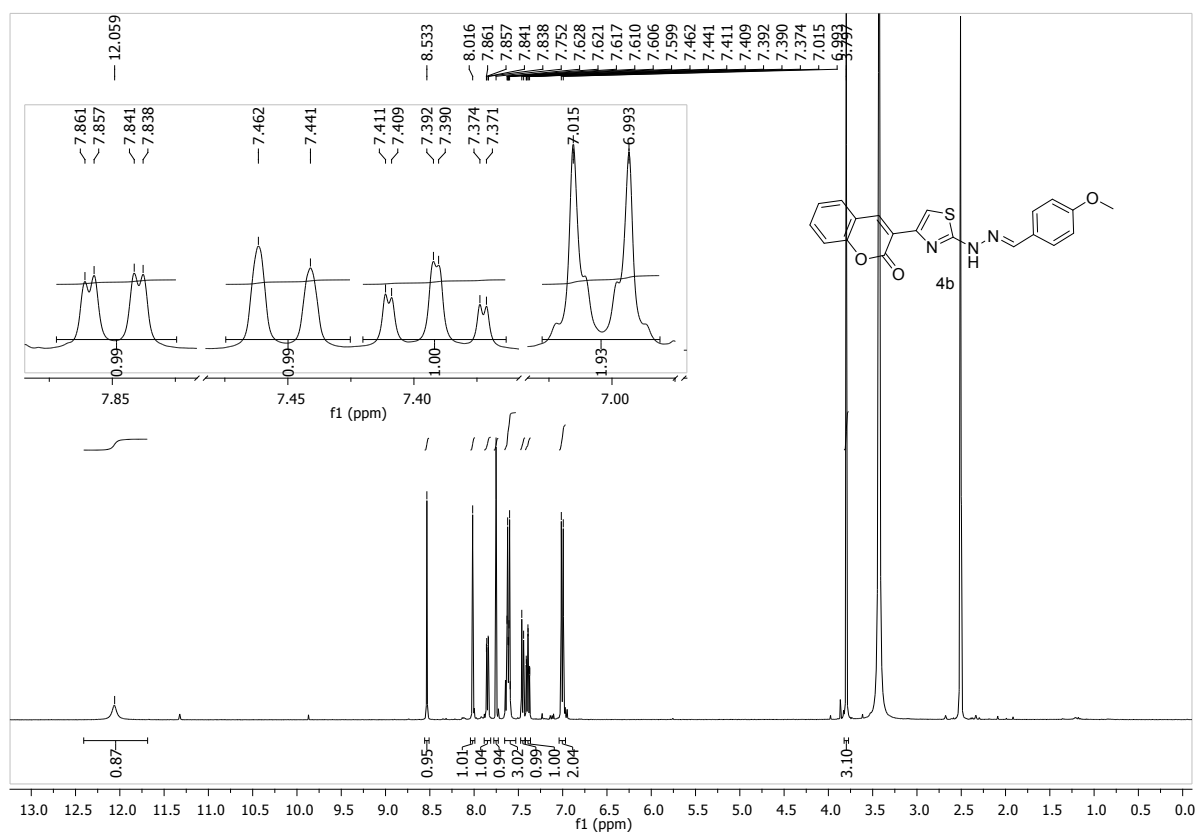

Figure S1-2. <sup>1</sup>H NMR Spectrum of 4b

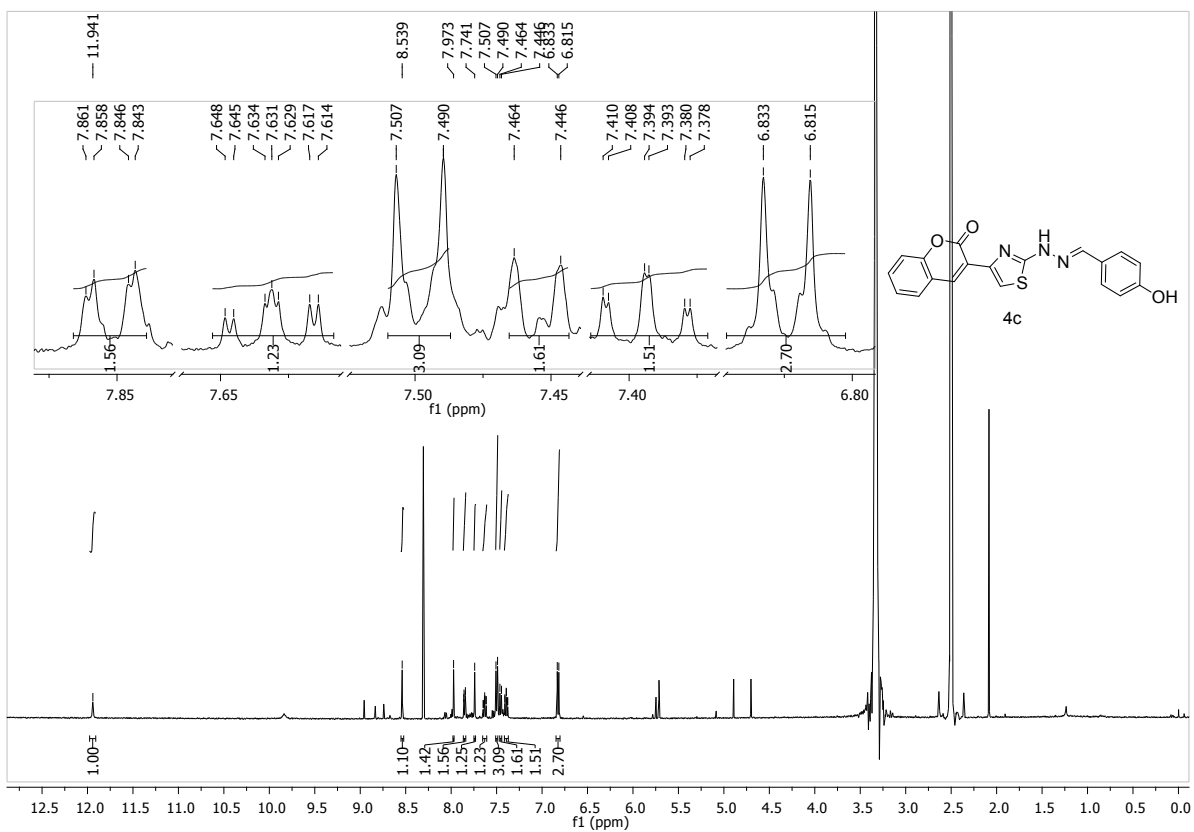

Figure S1-3. <sup>1</sup>H NMR Spectrum of 4c

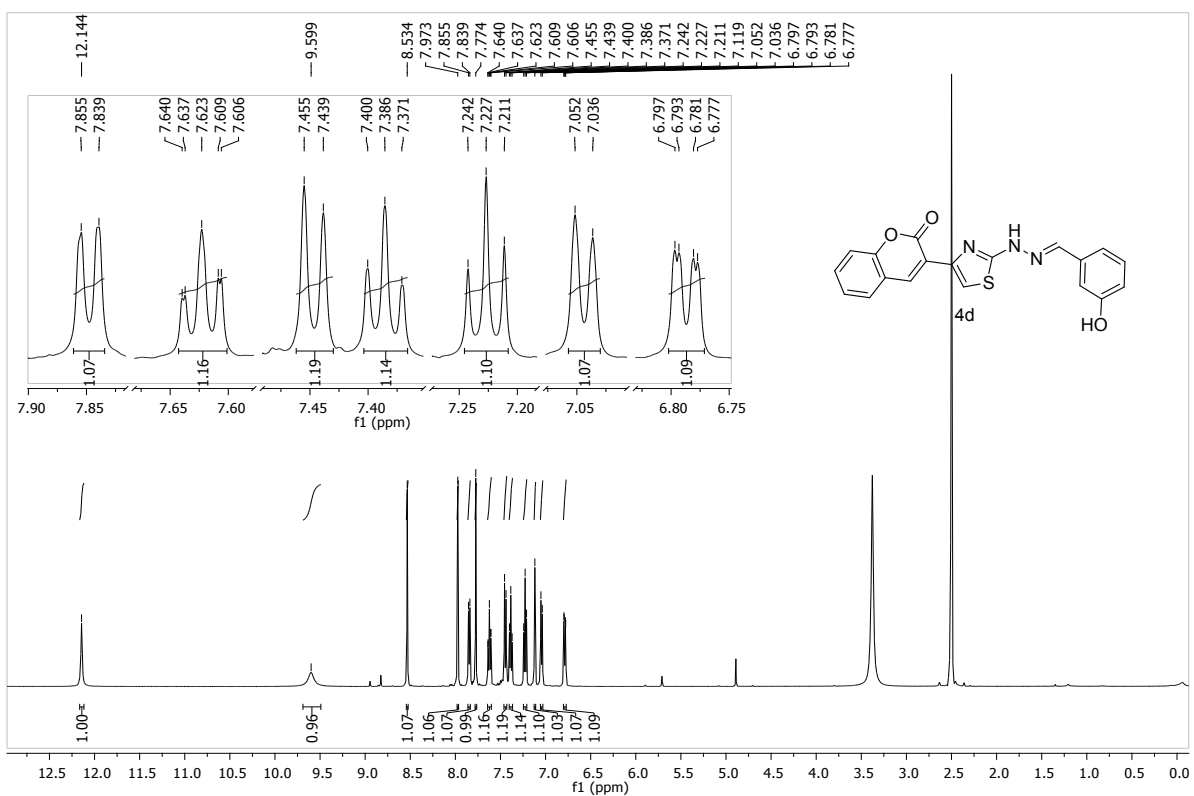

Figure S1-4. <sup>1</sup>H NMR Spectrum of 4d

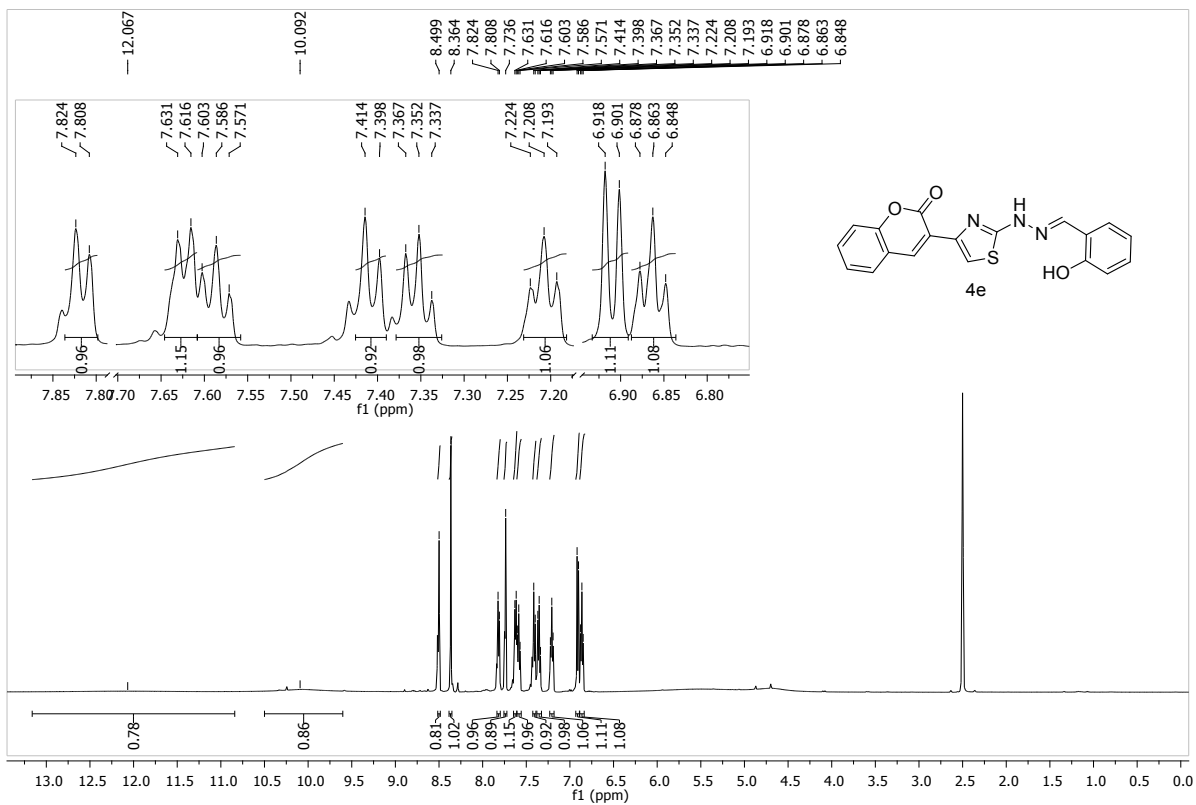

Figure S1-5. <sup>1</sup>H NMR Spectrum of 4e

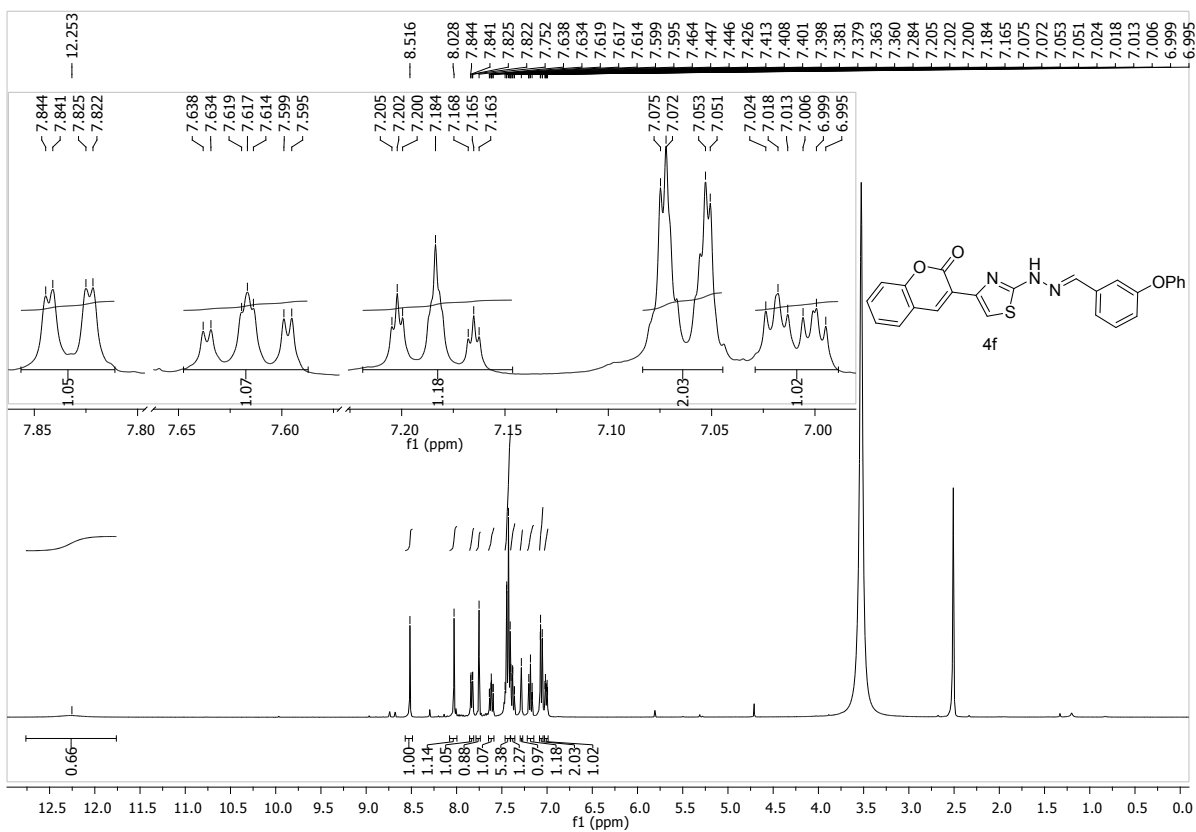

Figure S1-6. <sup>1</sup>H NMR Spectrum of 4f

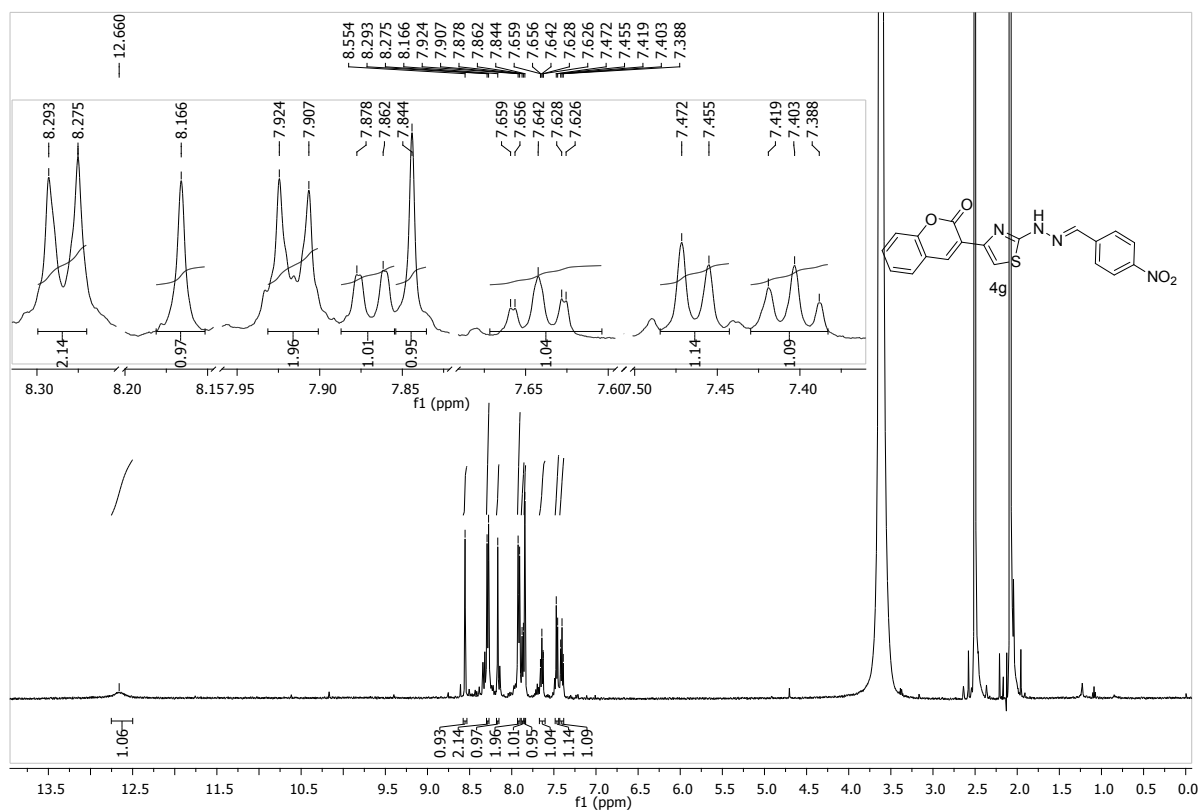

Figure S1-7. <sup>1</sup>H NMR Spectrum of 4g

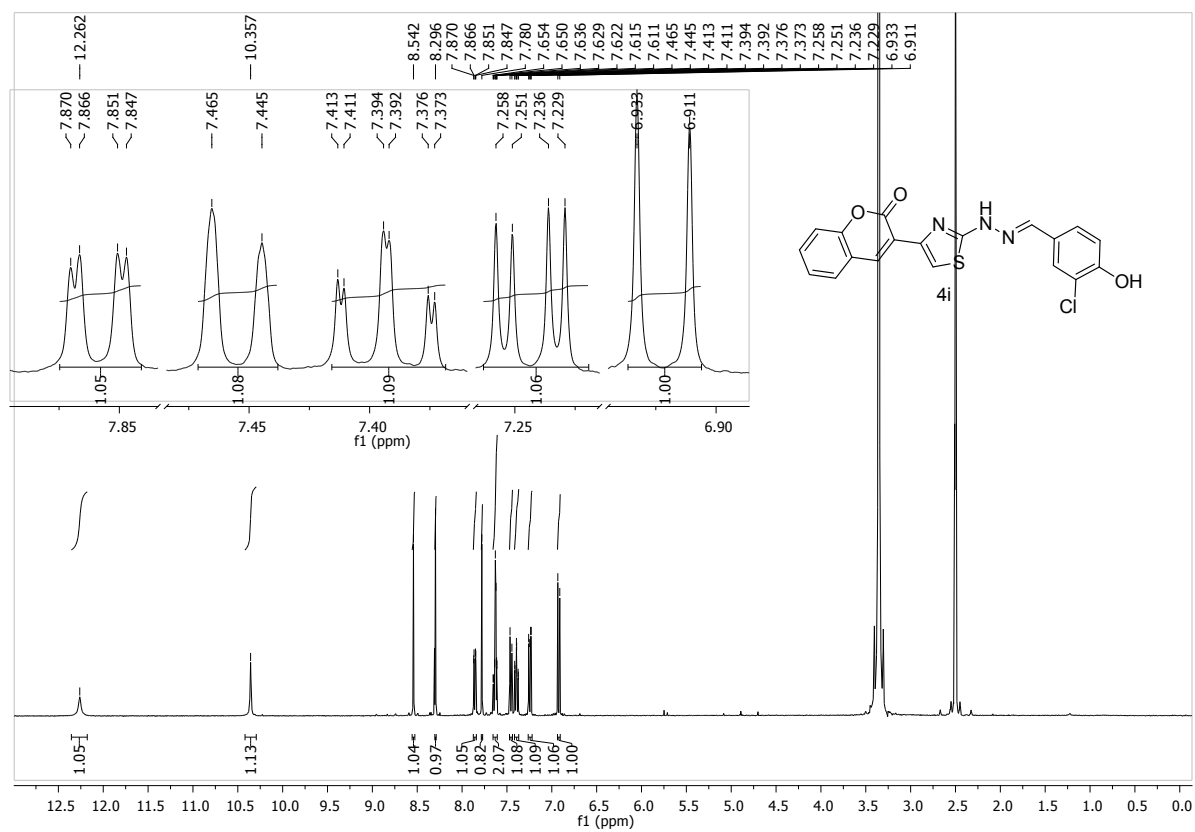

Figure S1-8. <sup>1</sup>H NMR Spectrum of 4i

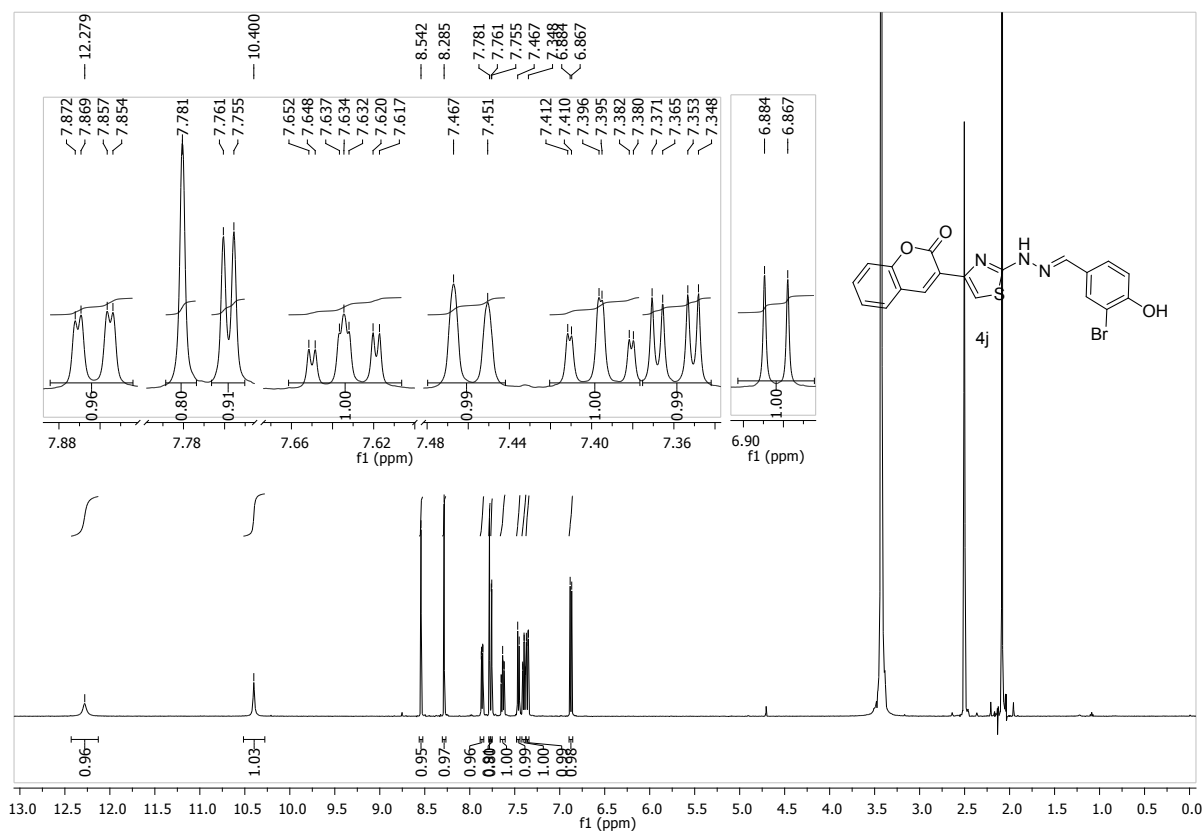

Figure S1-9. <sup>1</sup>H NMR Spectrum of 4j

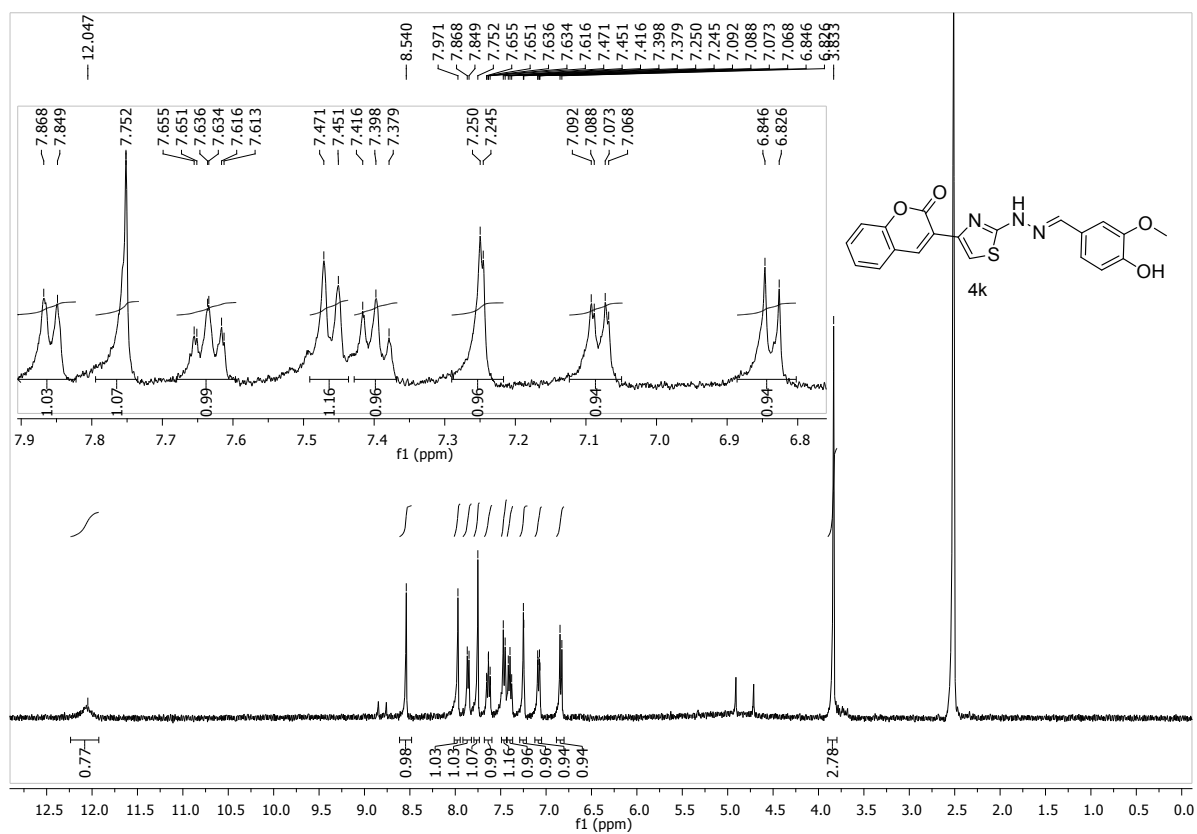

Figure S1-10. <sup>1</sup>H NMR Spectrum of 4k



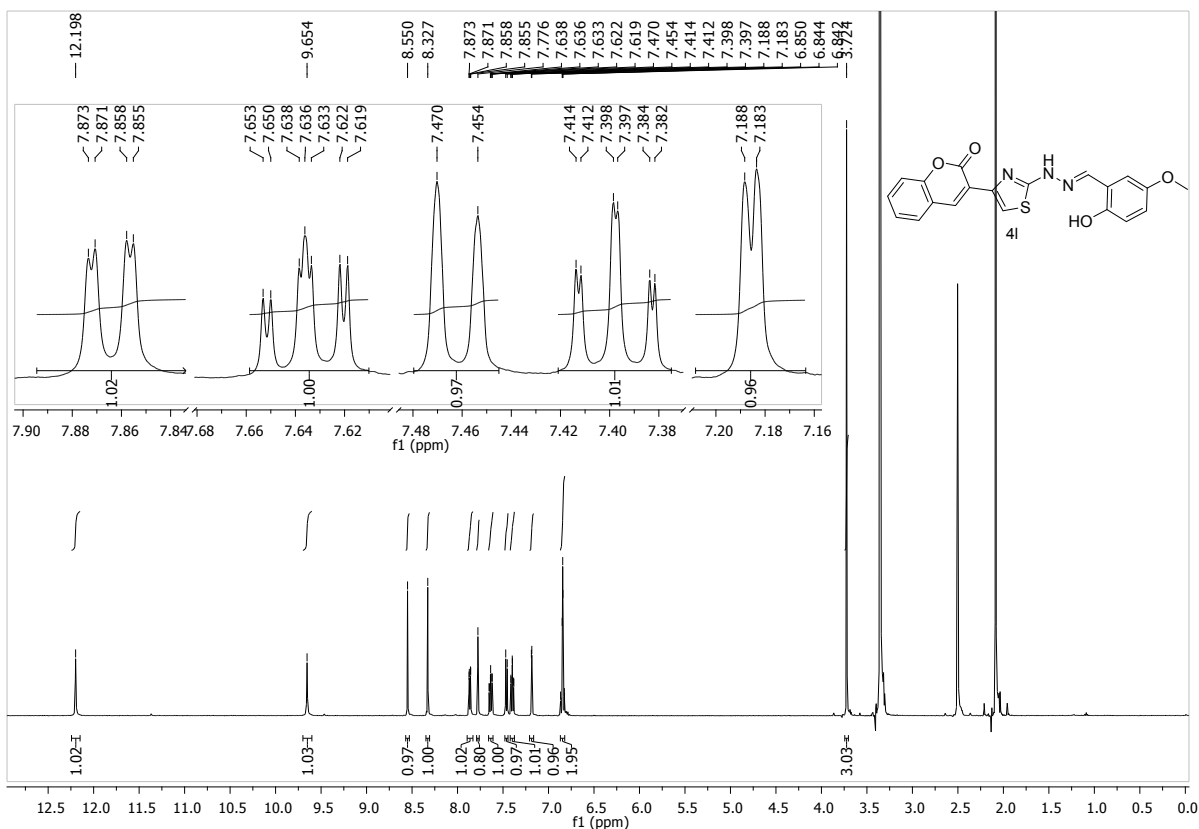

Figure S1-11. <sup>1</sup>H NMR Spectrum of 4l

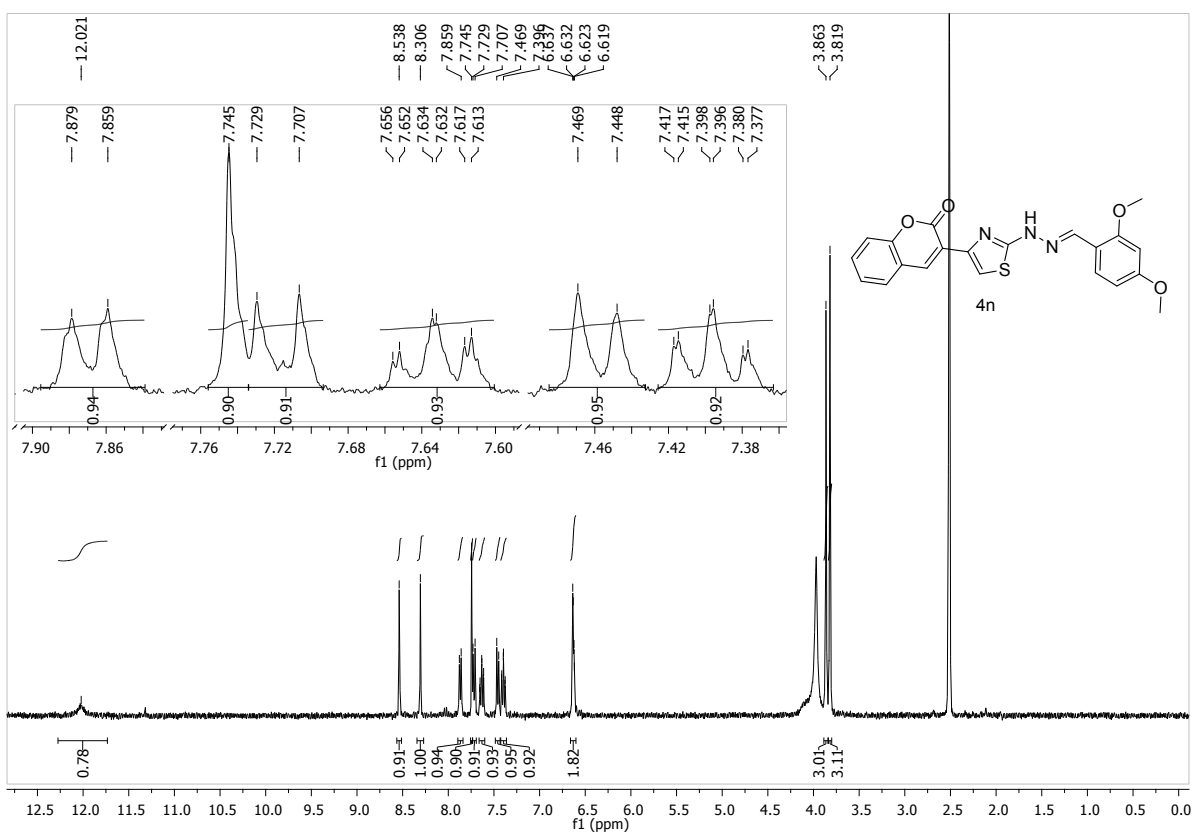

Figure S1-12. <sup>1</sup>H NMR Spectrum of Compound 4n

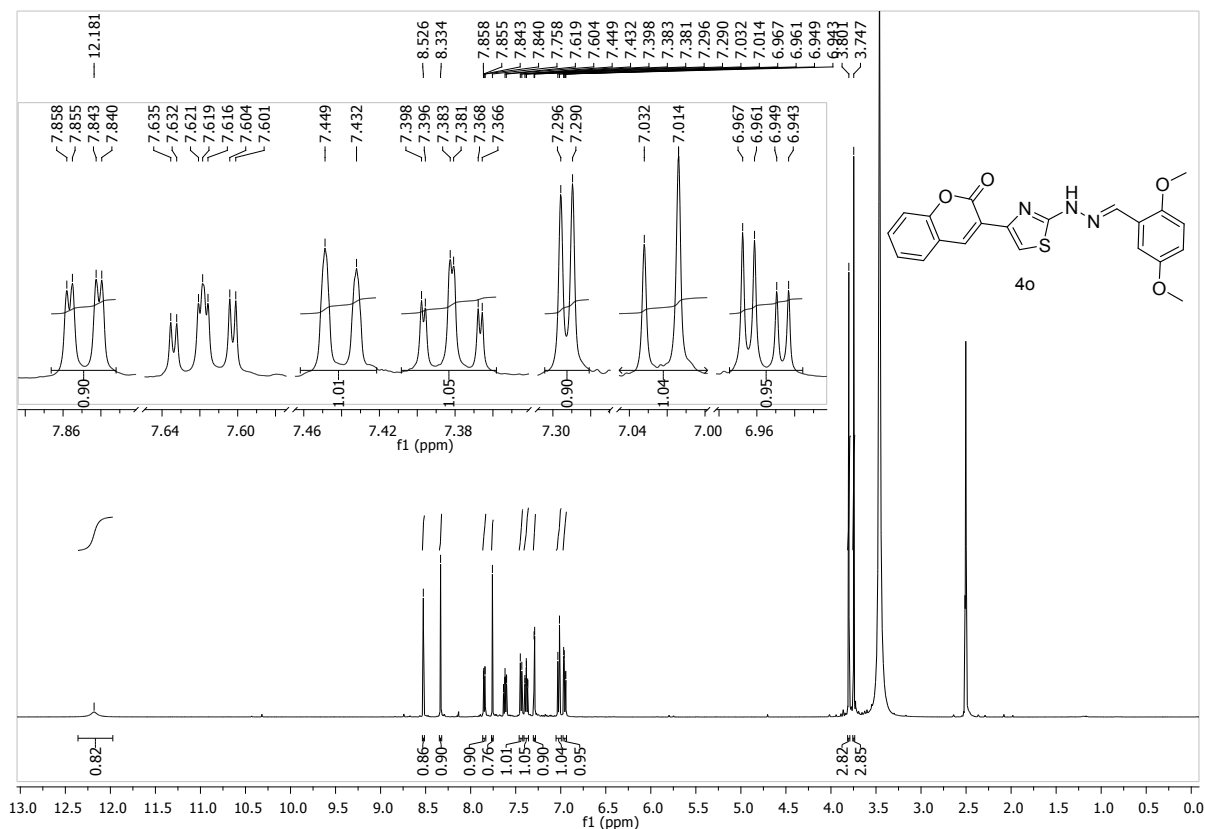

Figure S1-13. <sup>1</sup>H NMR Spectrum of 4o

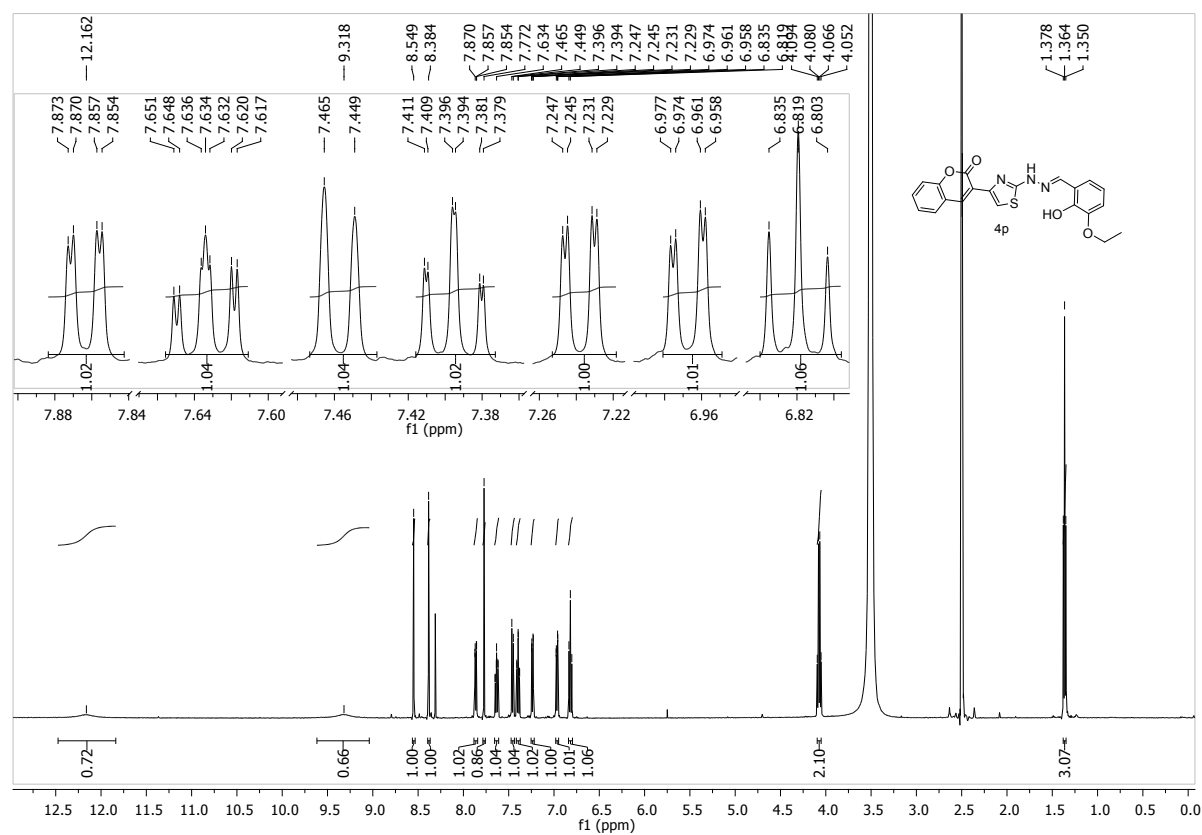

Figure S1-14. <sup>1</sup>H NMR Spectrum of 4p

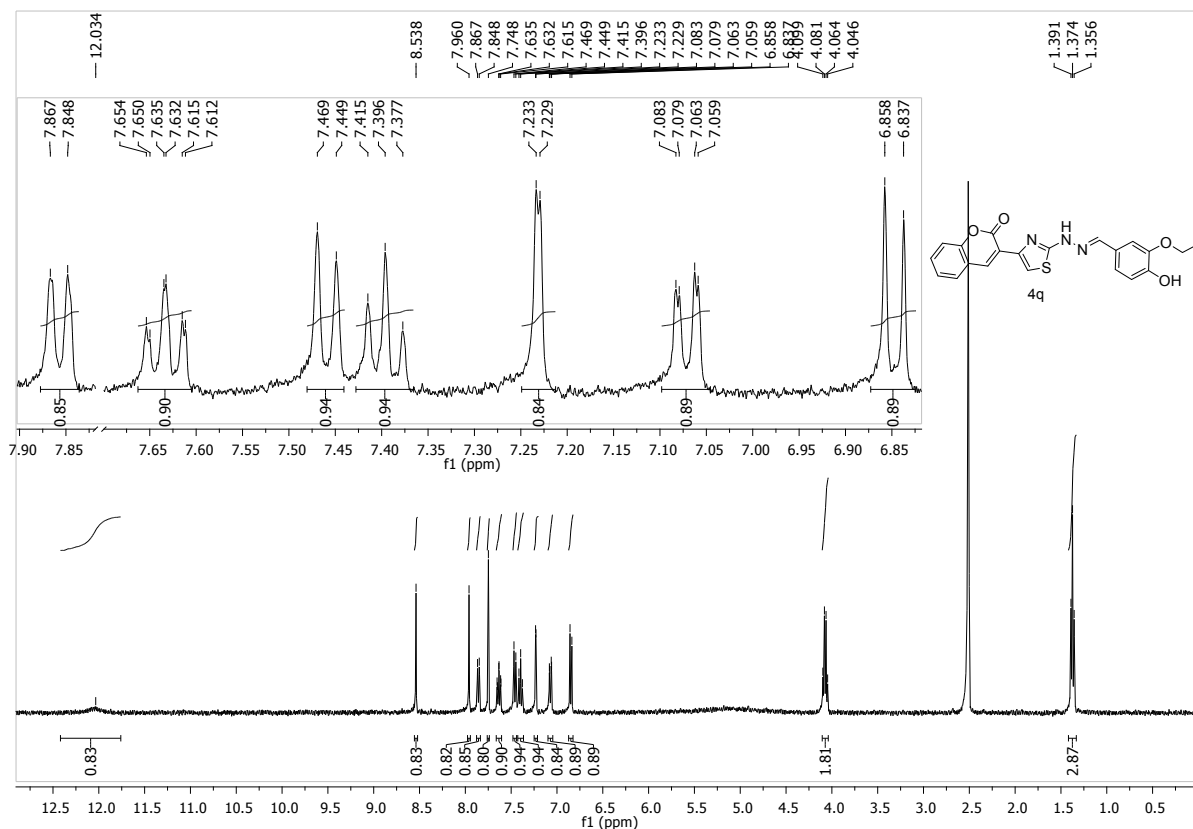

Figure S1-15. <sup>1</sup>H NMR Spectrum of Compound 4q

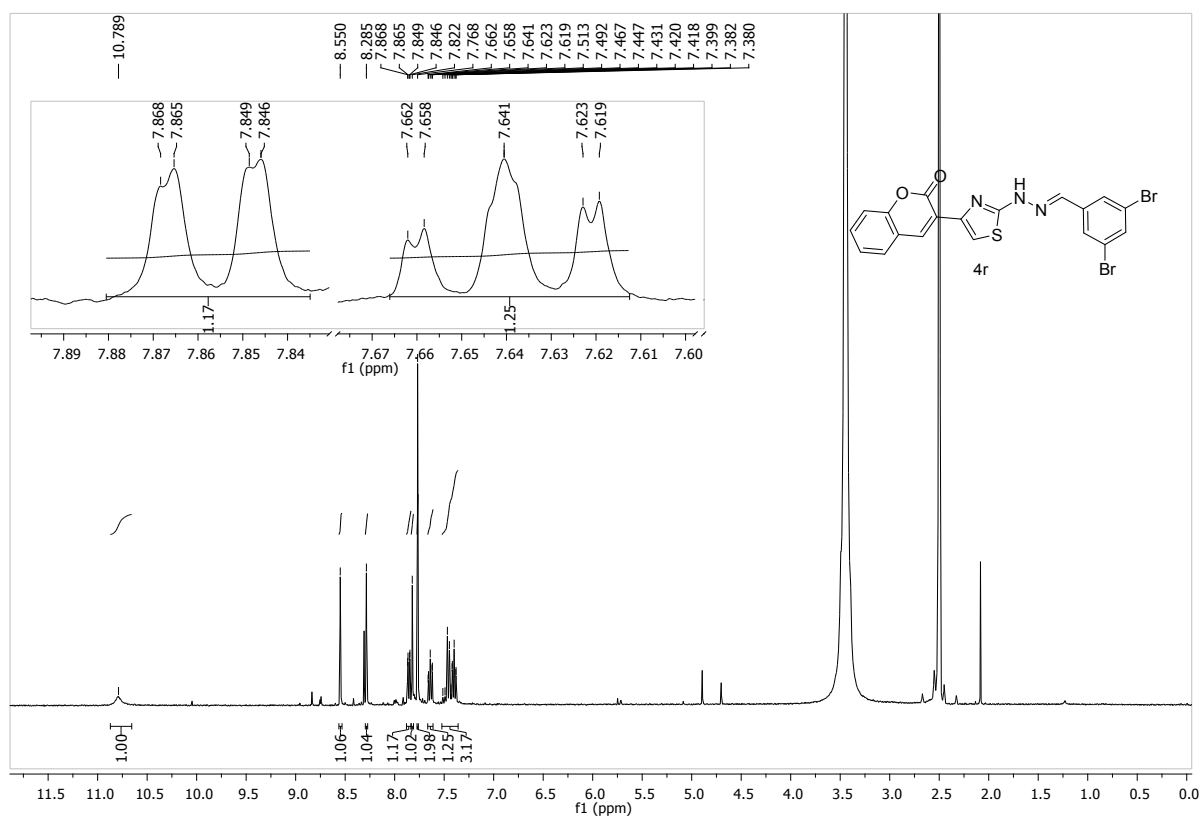

Figure S1-16. <sup>1</sup>H NMR Spectrum of 4r

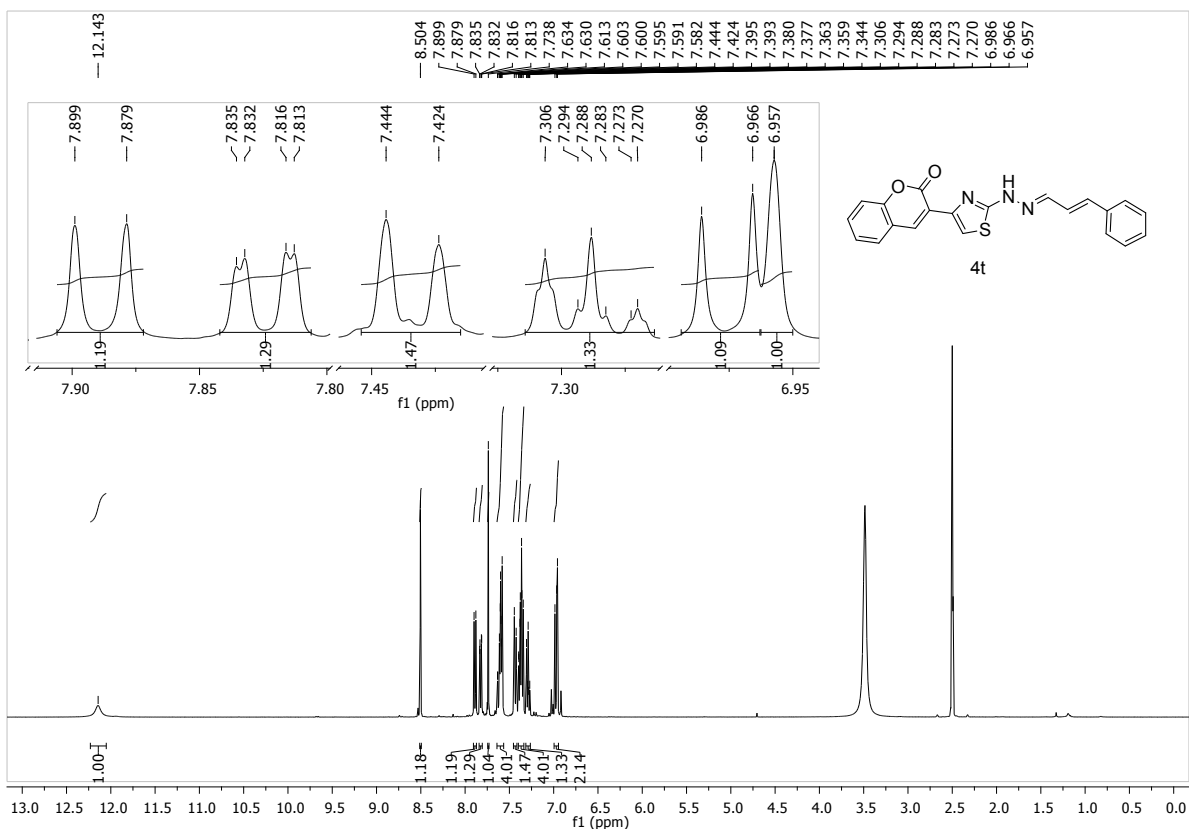

Figure S1-17. <sup>1</sup>H NMR Spectrum of 4t

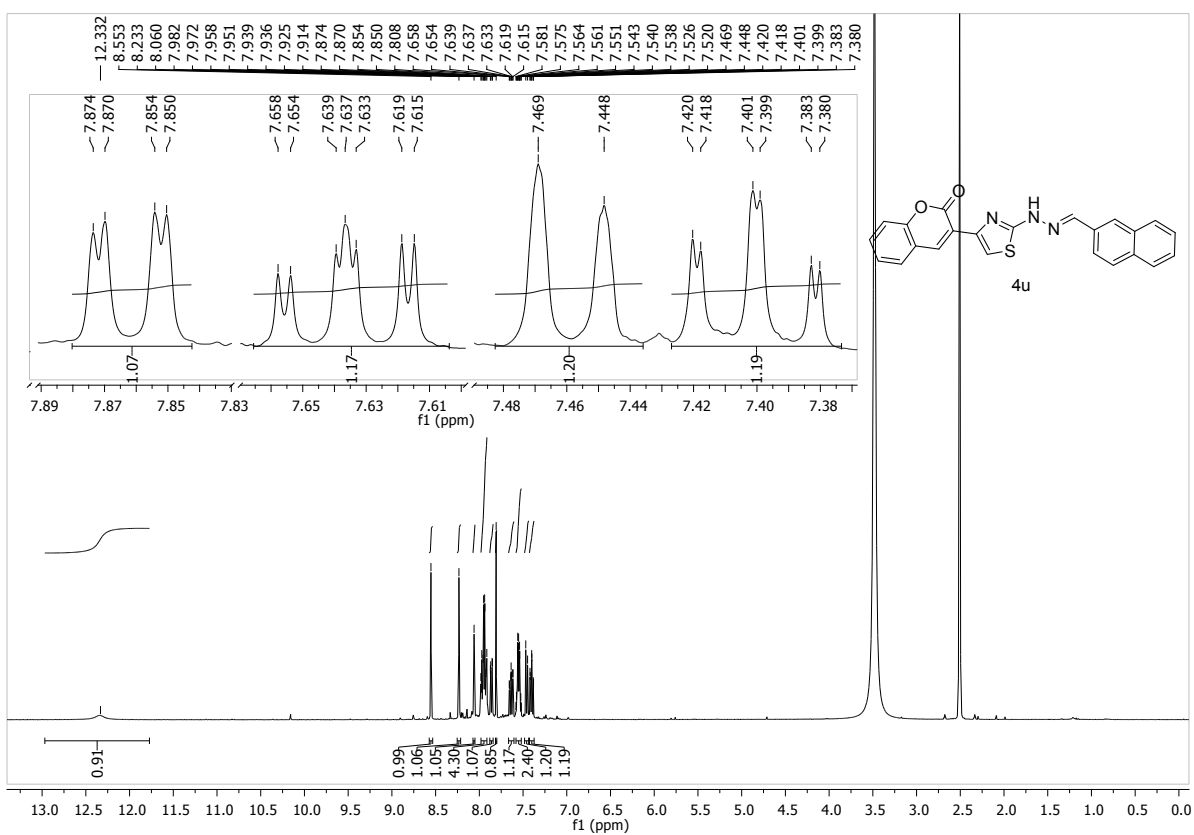

Figure S1-18. <sup>1</sup>H NMR Spectrum of 4u

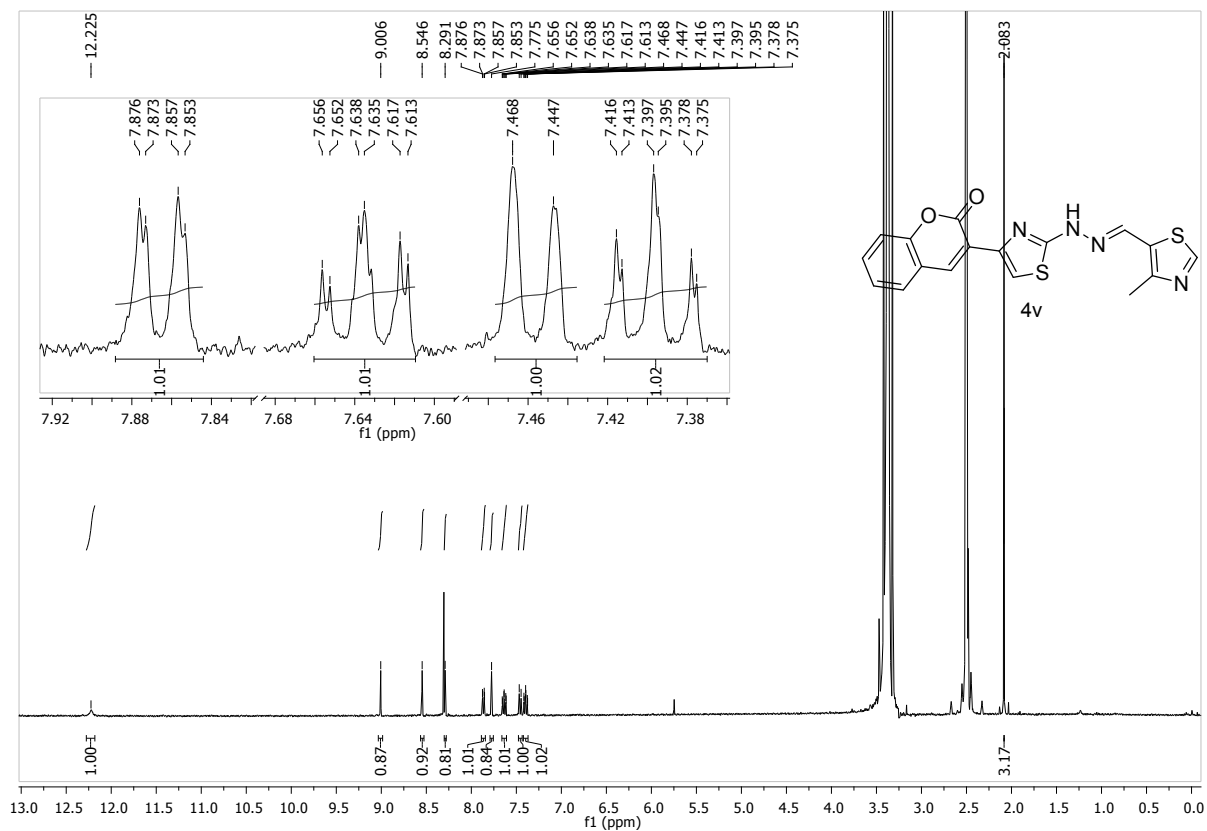

Figure S1-19. <sup>1</sup>H NMR Spectrum of 4v

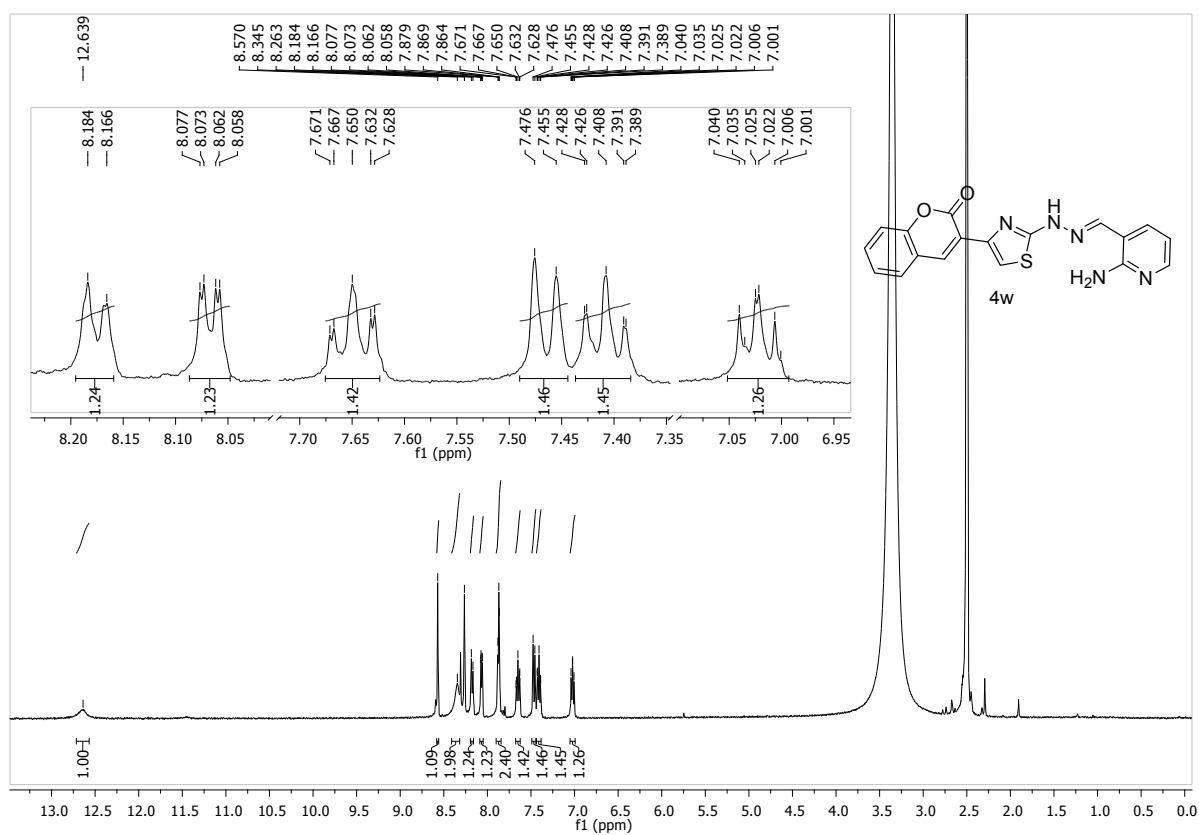

Figure S1-20. <sup>1</sup>H NMR Spectrum of 4w

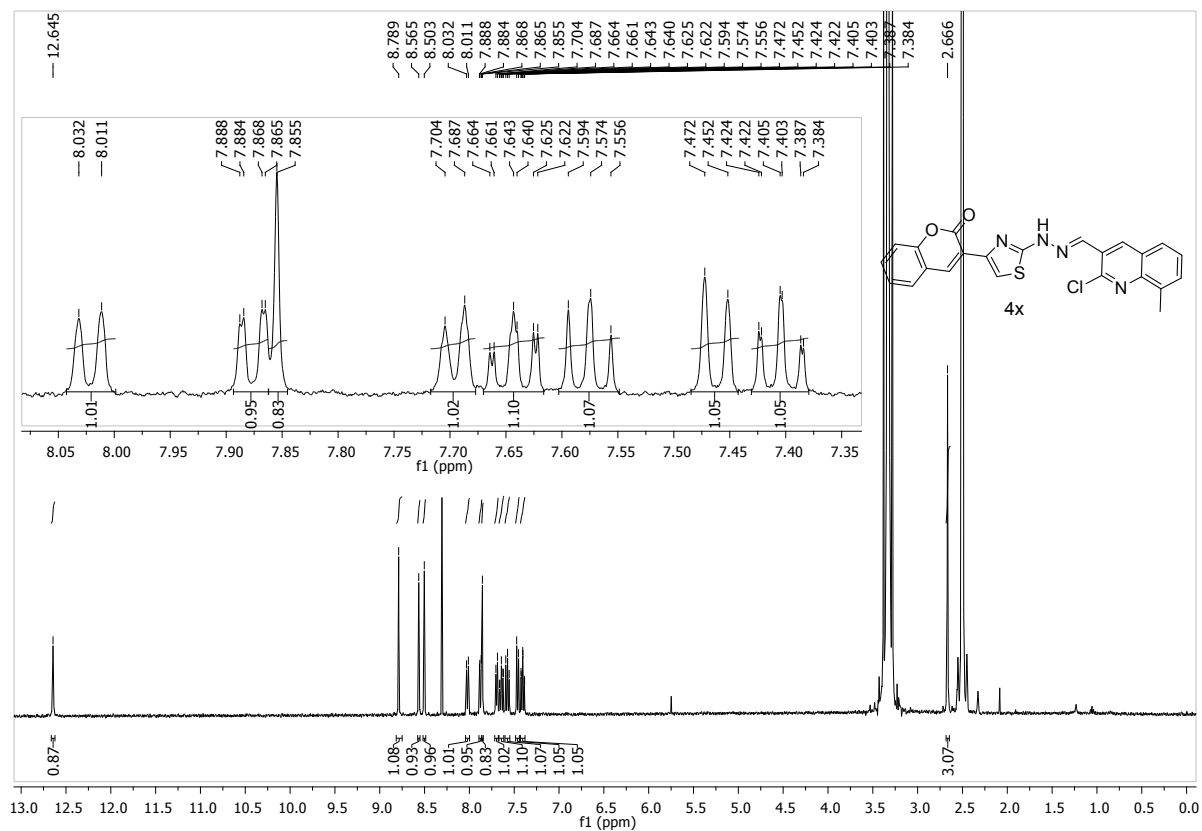

Figure S1-21. <sup>1</sup>H NMR Spectrum of 4x

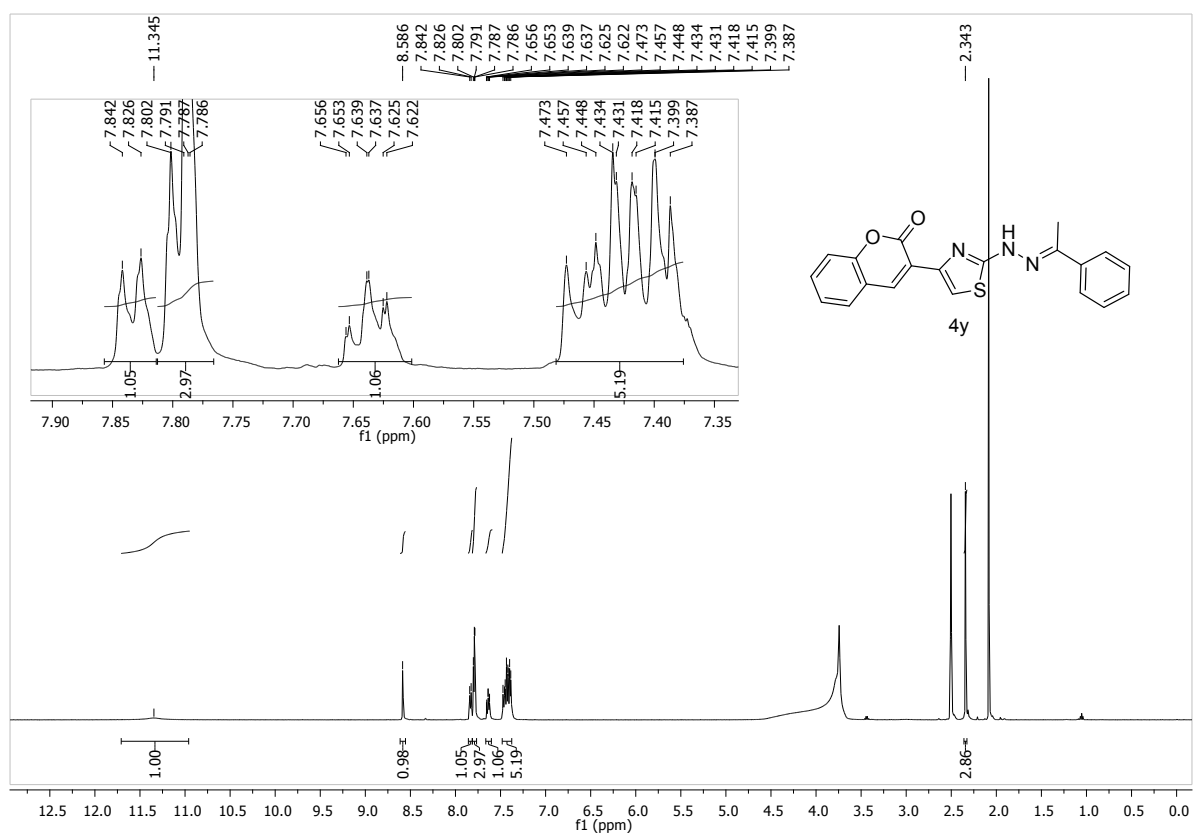

Figure S1-22. <sup>1</sup>H NMR Spectrum of 4y

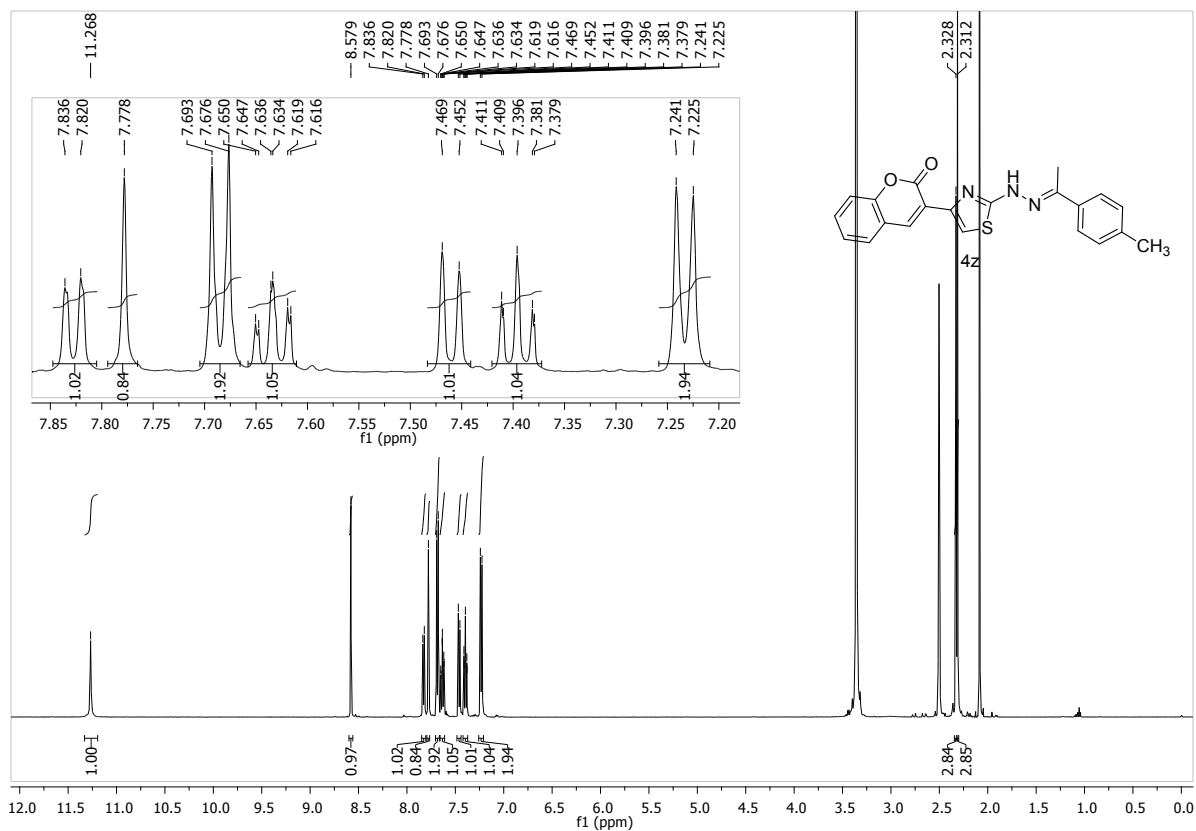

Figure S1-23. <sup>1</sup>H NMR Spectrum of 4z

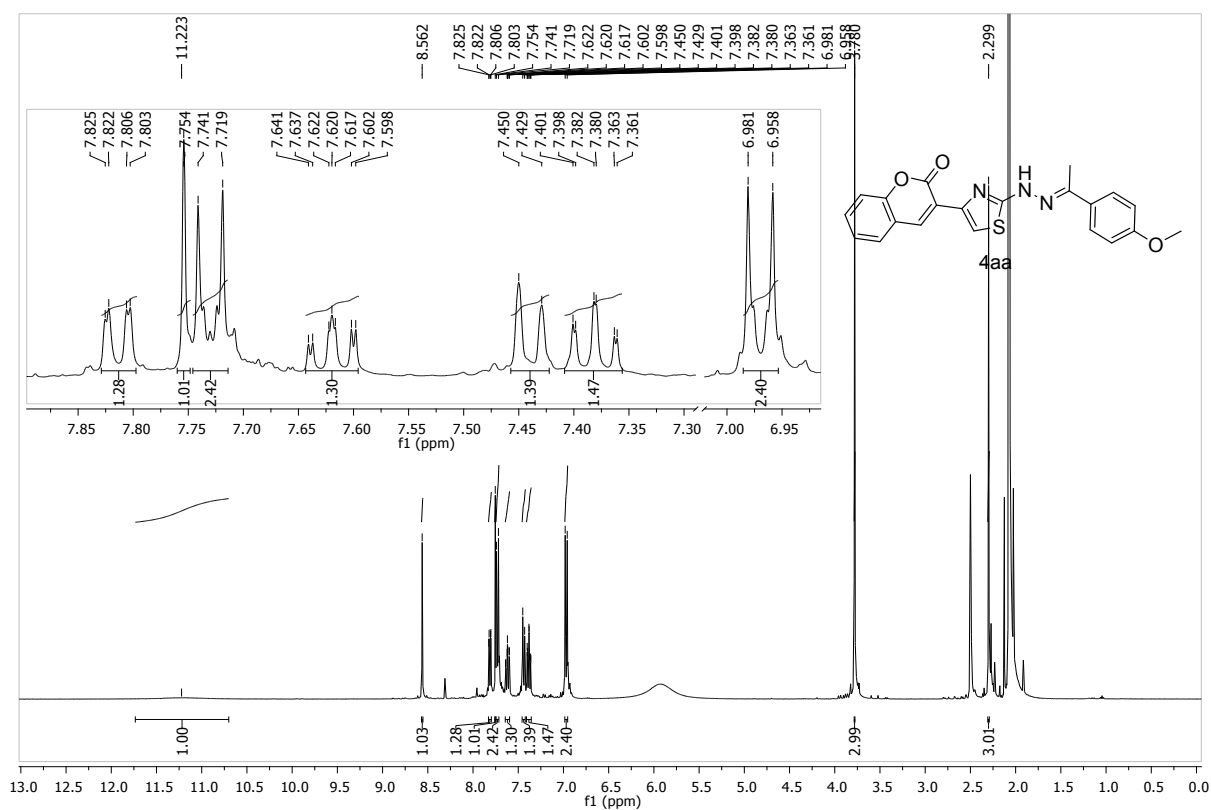

Figure S1-24. <sup>1</sup>H NMR Spectrum of 4aa

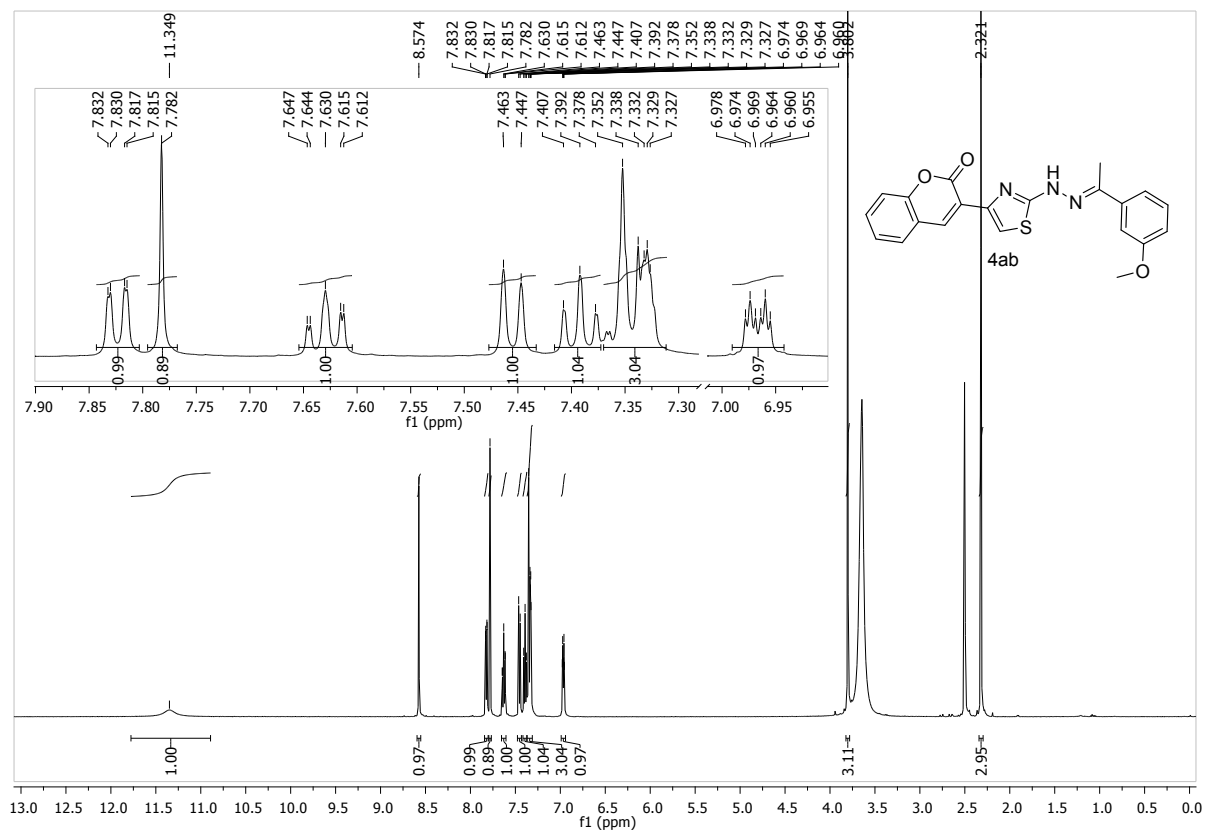

Figure S1-25. <sup>1</sup>H NMR Spectrum of 4ab

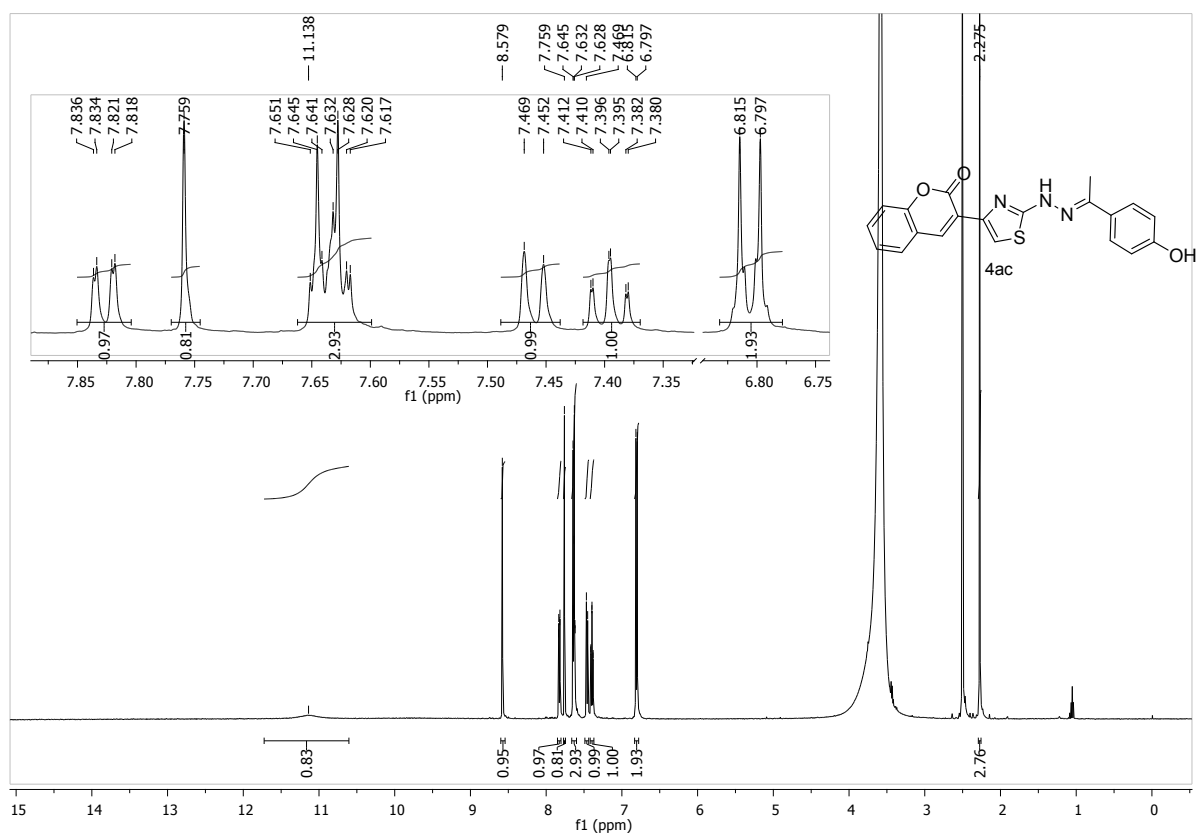

Figure S1-26. <sup>1</sup>H NMR Spectrum of 4ac



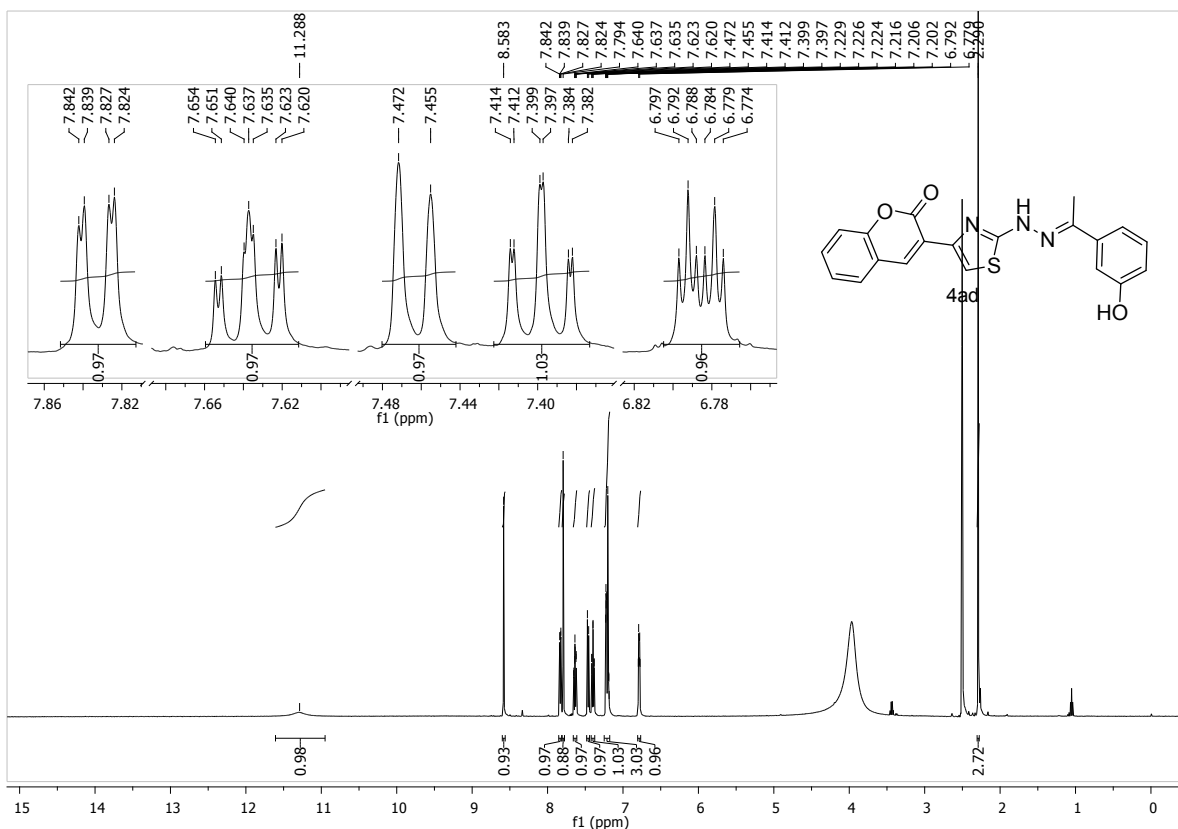

Figure S1-27. <sup>1</sup>H NMR Spectrum of 4ad

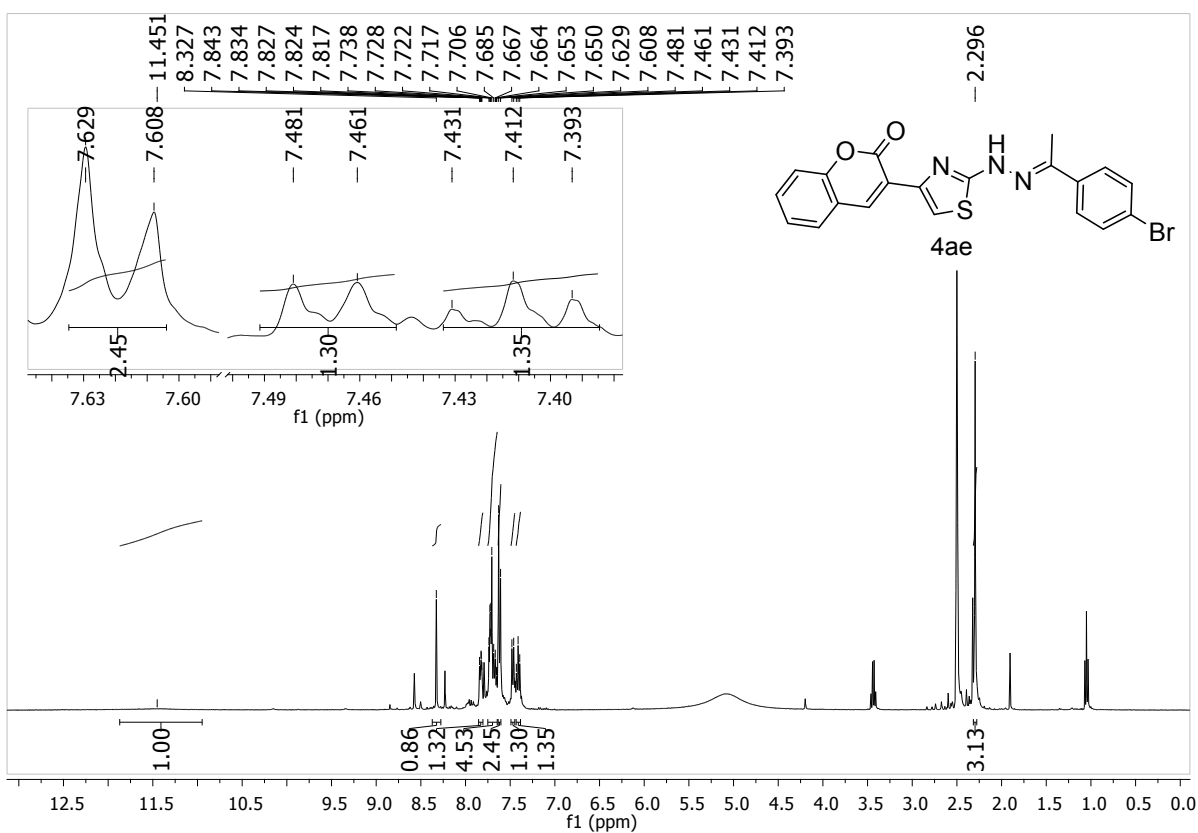

Figure S1-28. <sup>1</sup>H NMR Spectrum of Compound 4ae

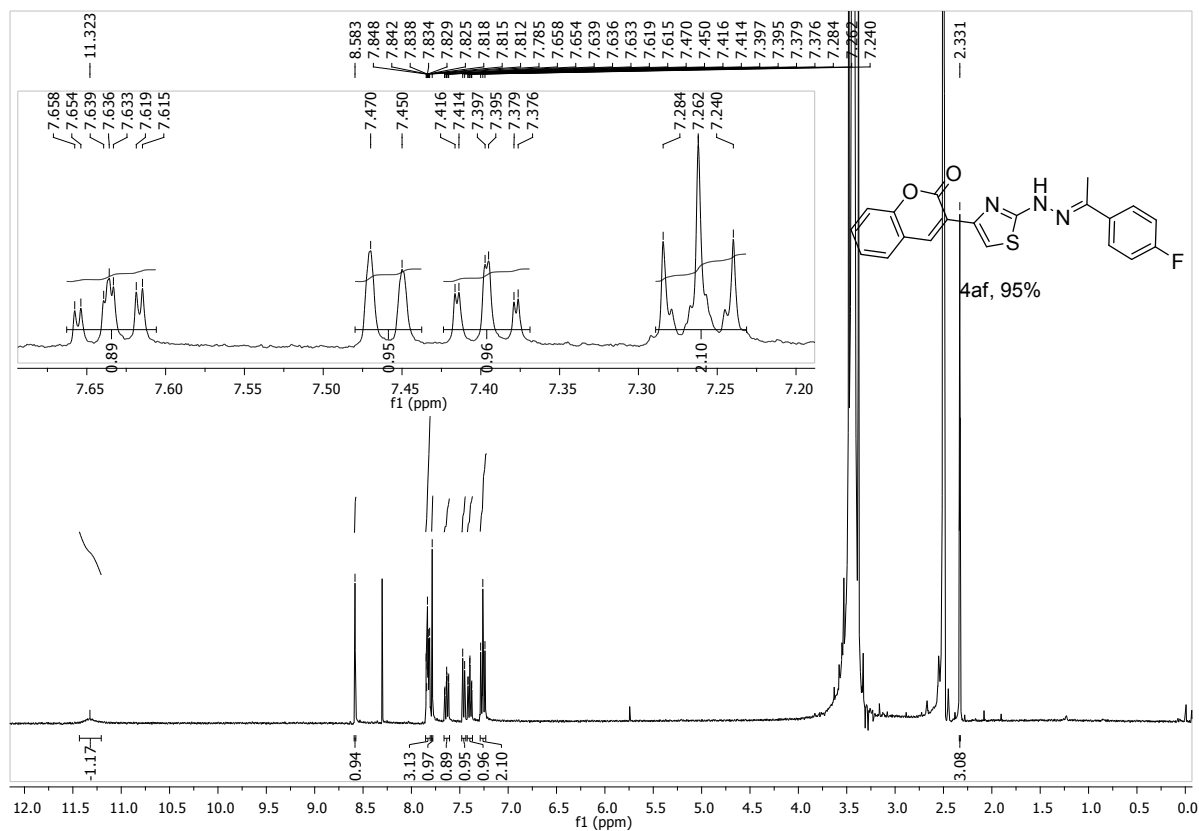

Figure S1-29. <sup>1</sup>H NMR Spectrum of 4af

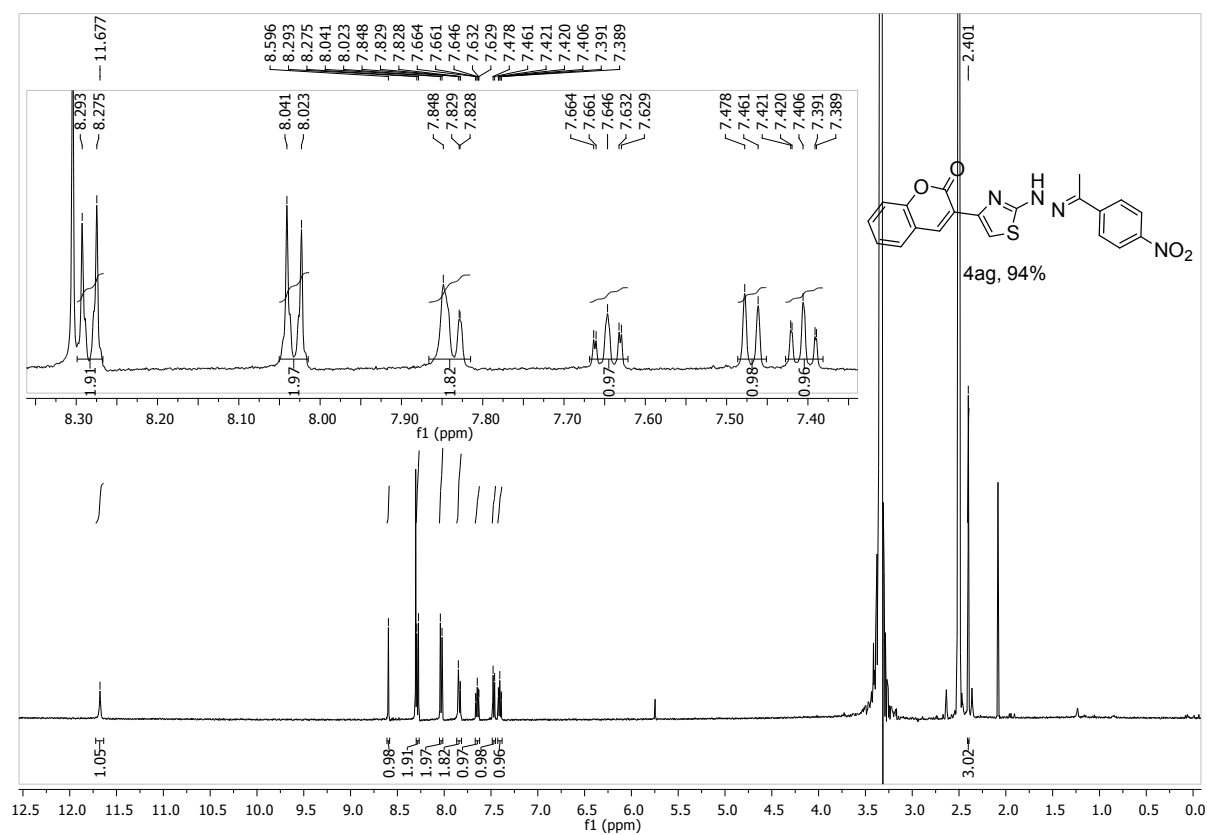

Figure S1-30. <sup>1</sup>H NMR Spectrum of 4ag

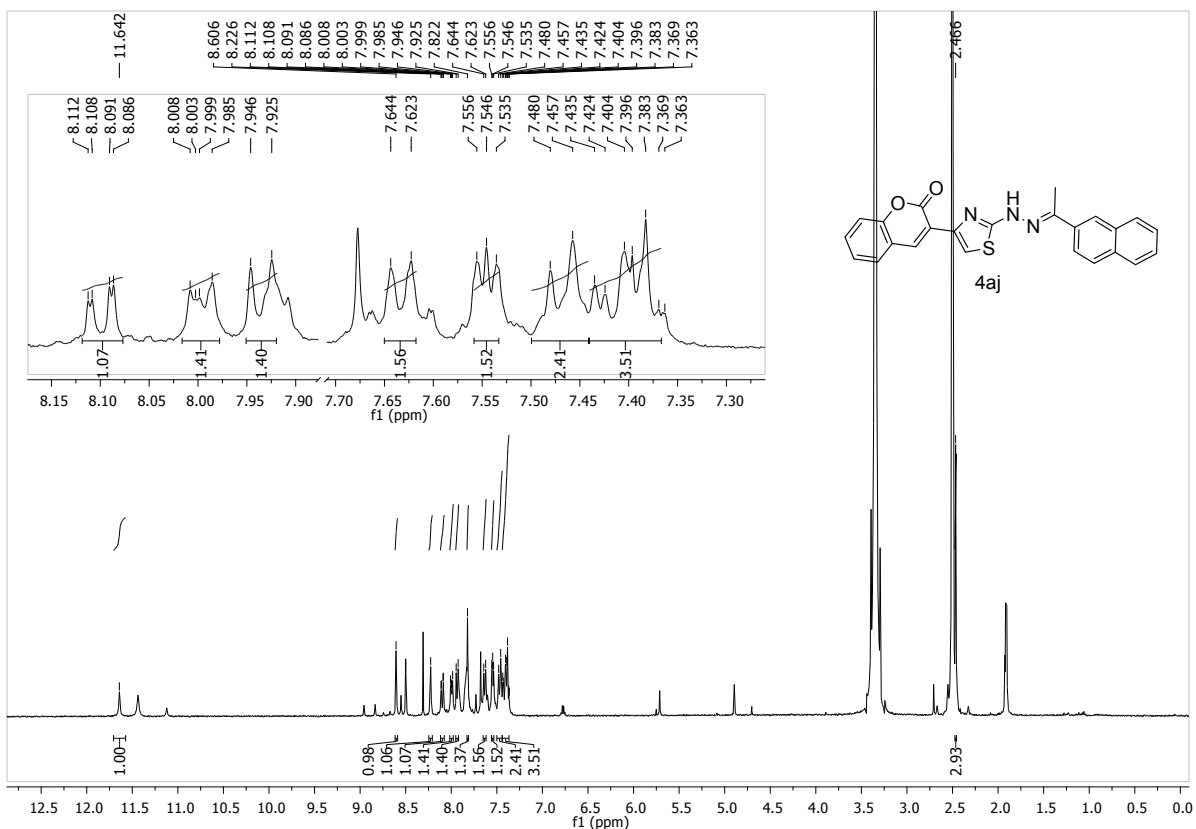

Figure S1-31. <sup>1</sup>H NMR Spectrum of Compound 4aj

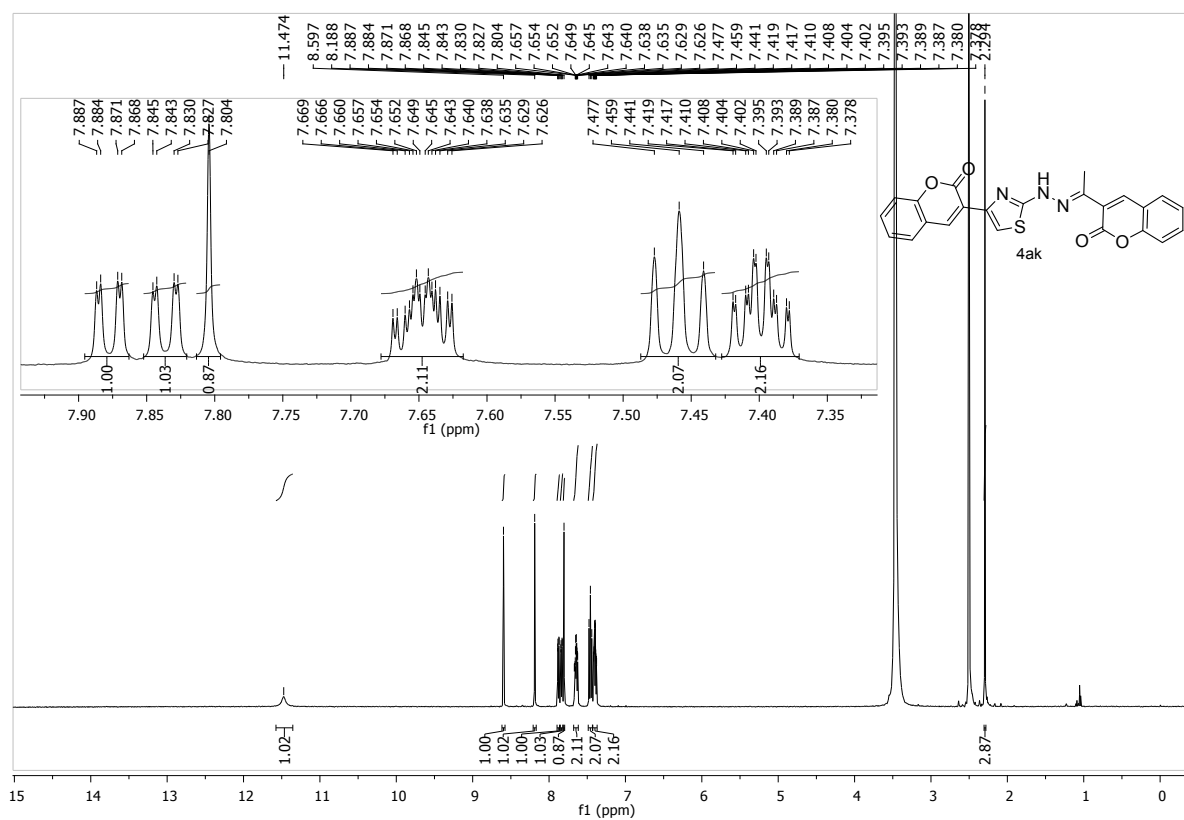

Figure S1-32. <sup>1</sup>H NMR Spectrum of Compound 4ak

Copies of HRMS and Mass spectra of synthesized compounds (4a-4ak)

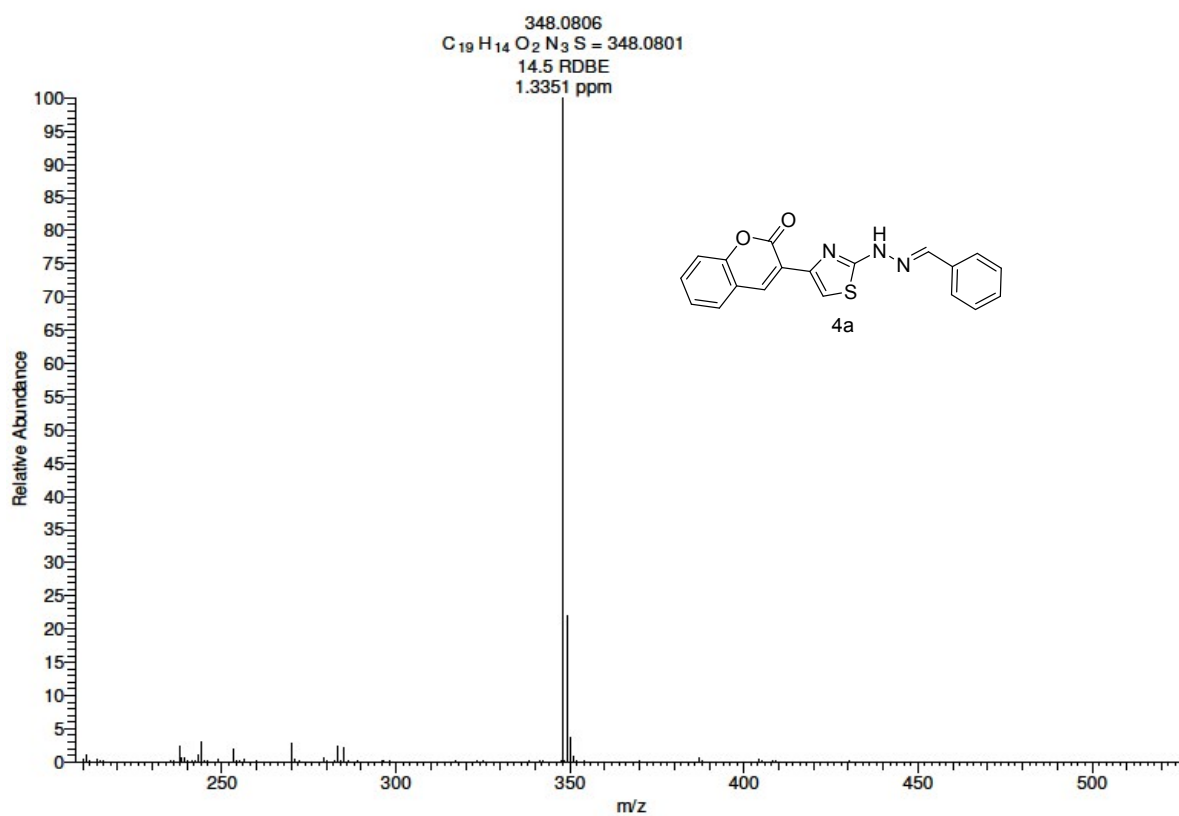

Figure S2-1. HRMS Spectrum of 4a

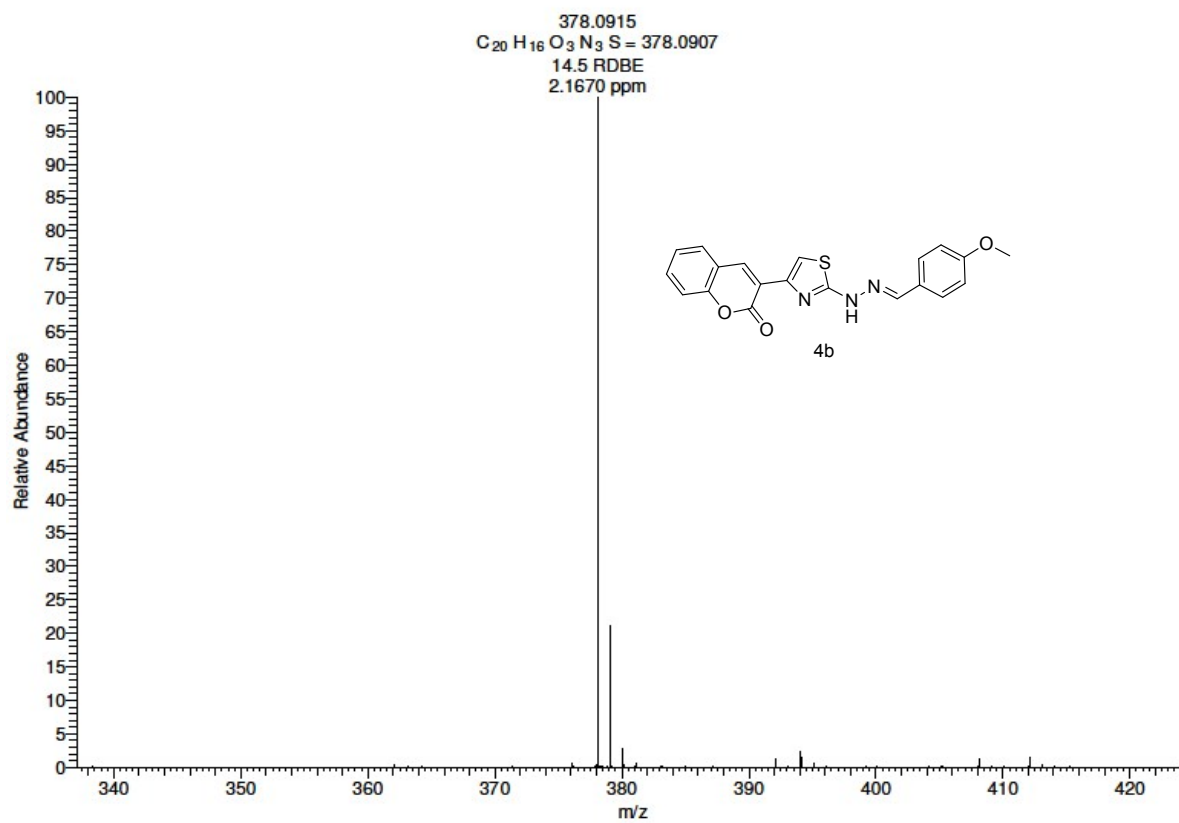

Figure S2-2. HRMS Spectrum of 4b

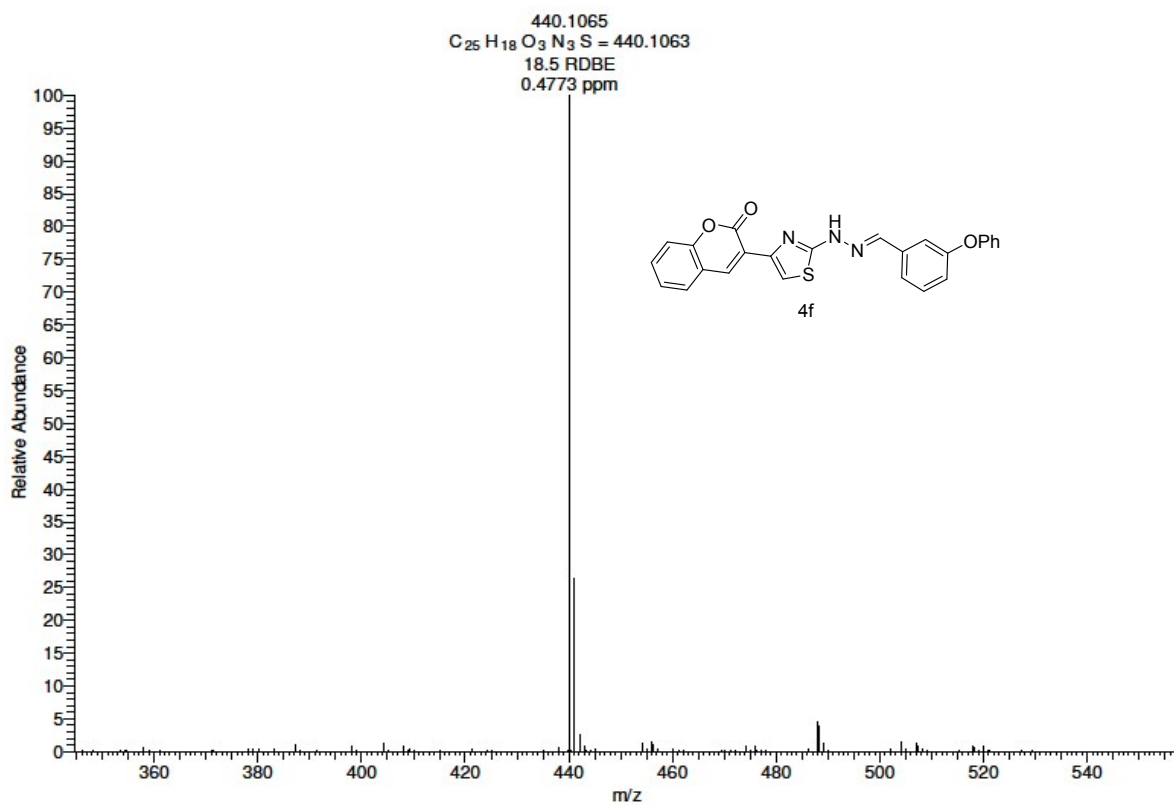

Figure S2-3. HRMS Spectrum of 4f

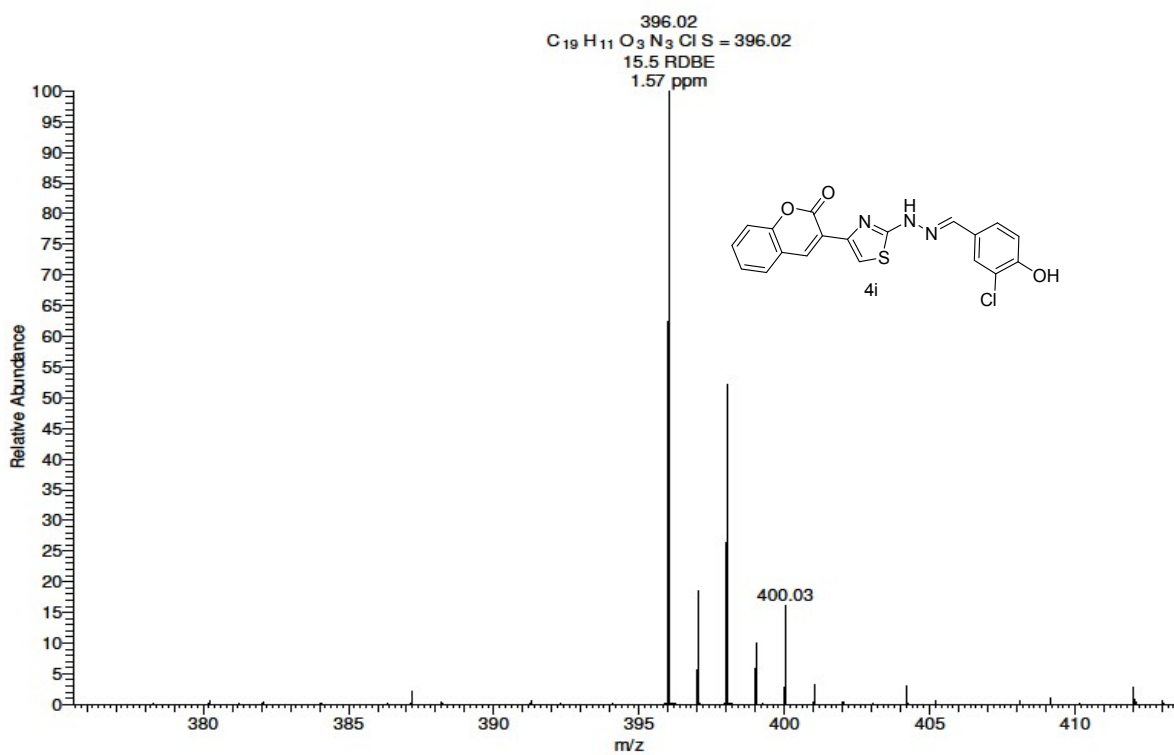

Figure S2-4. HRMS Spectrum of 4i

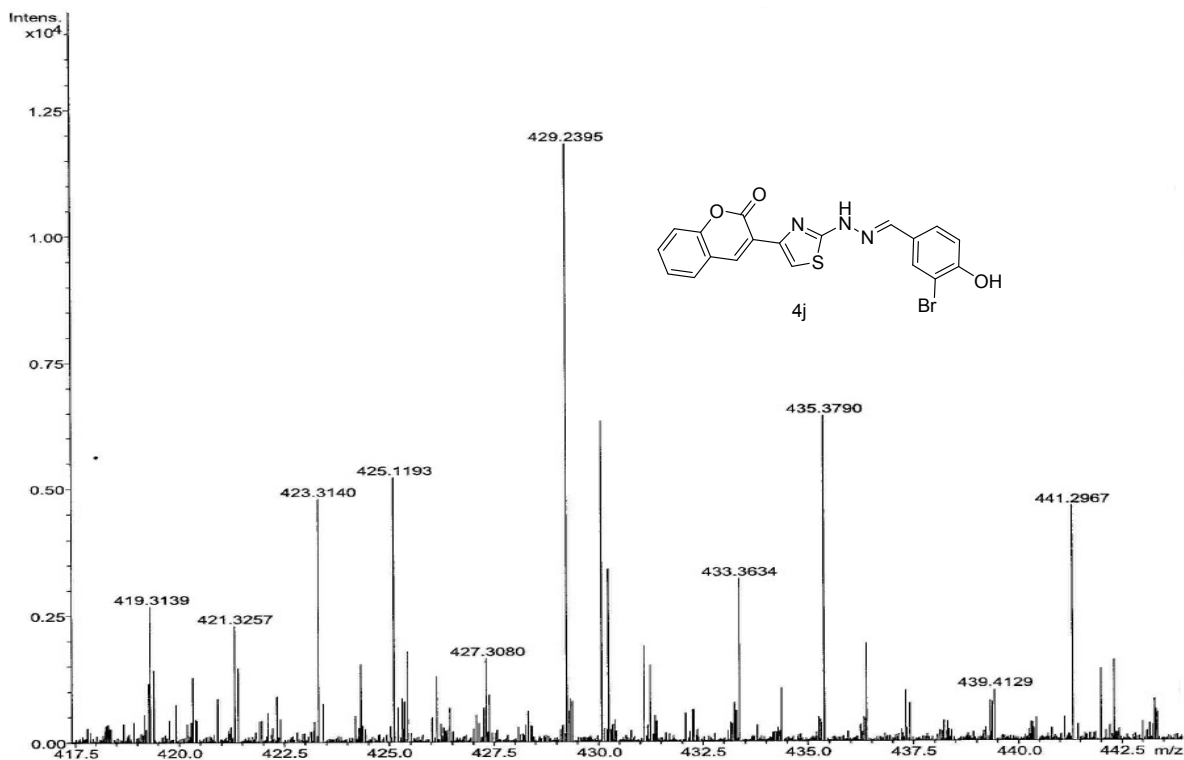

Figure S2-5. HRMS Spectrum of 4j

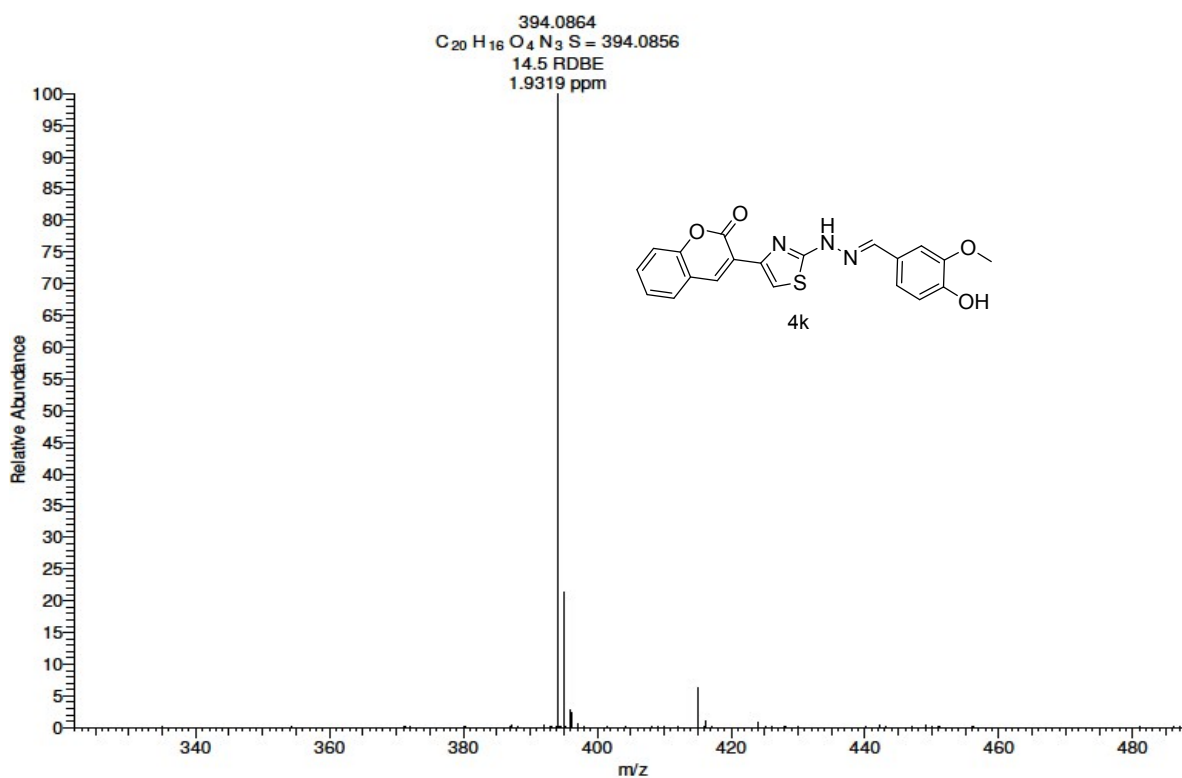

Figure S2-6. HRMS Spectrum of 4k

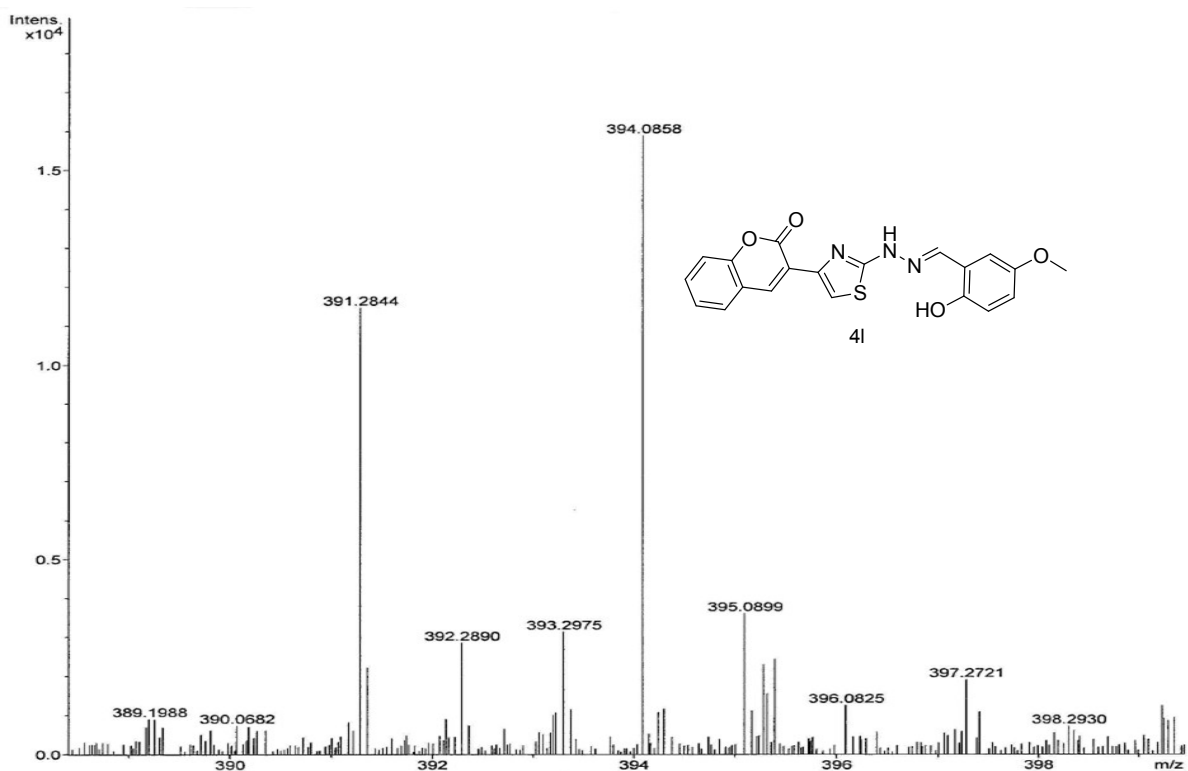

Figure S2-7. HRMS Spectrum of 4l

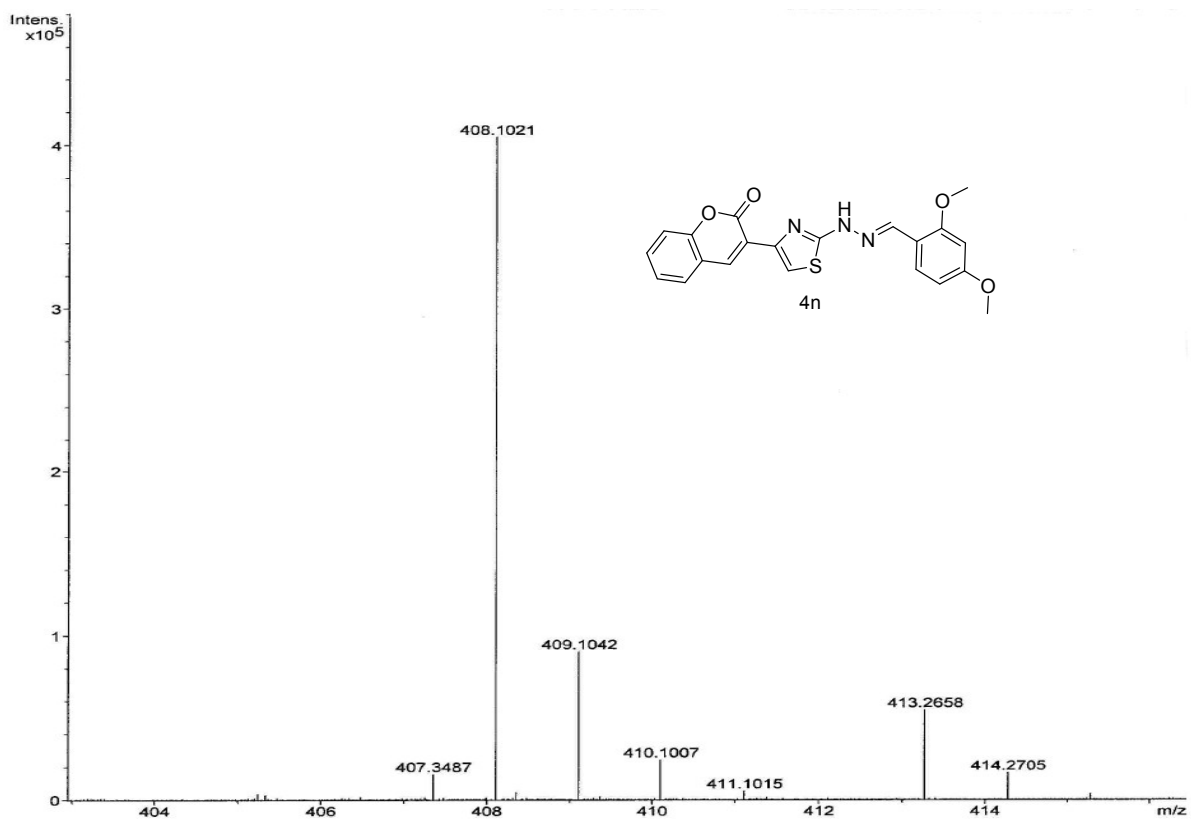

Figure S2-8. HRMS Spectrum of 4n

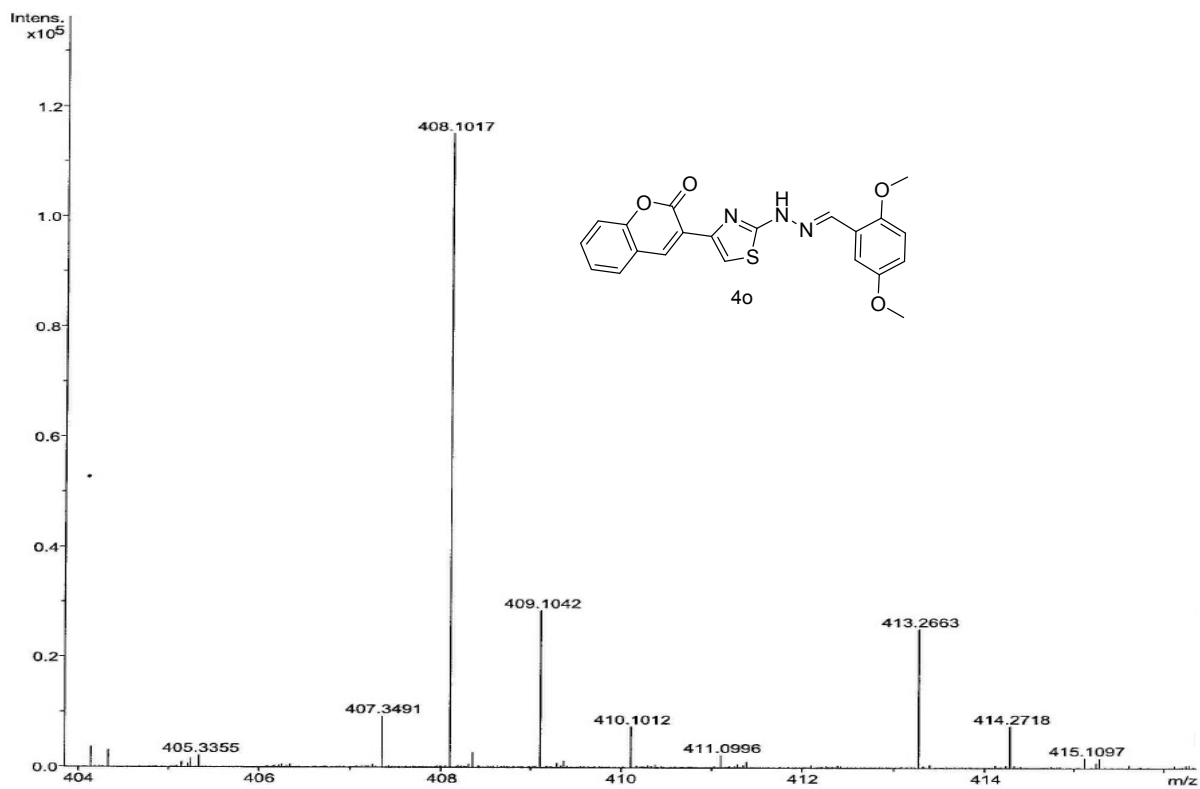

Figure S2-9. HRMS Spectrum of 4o

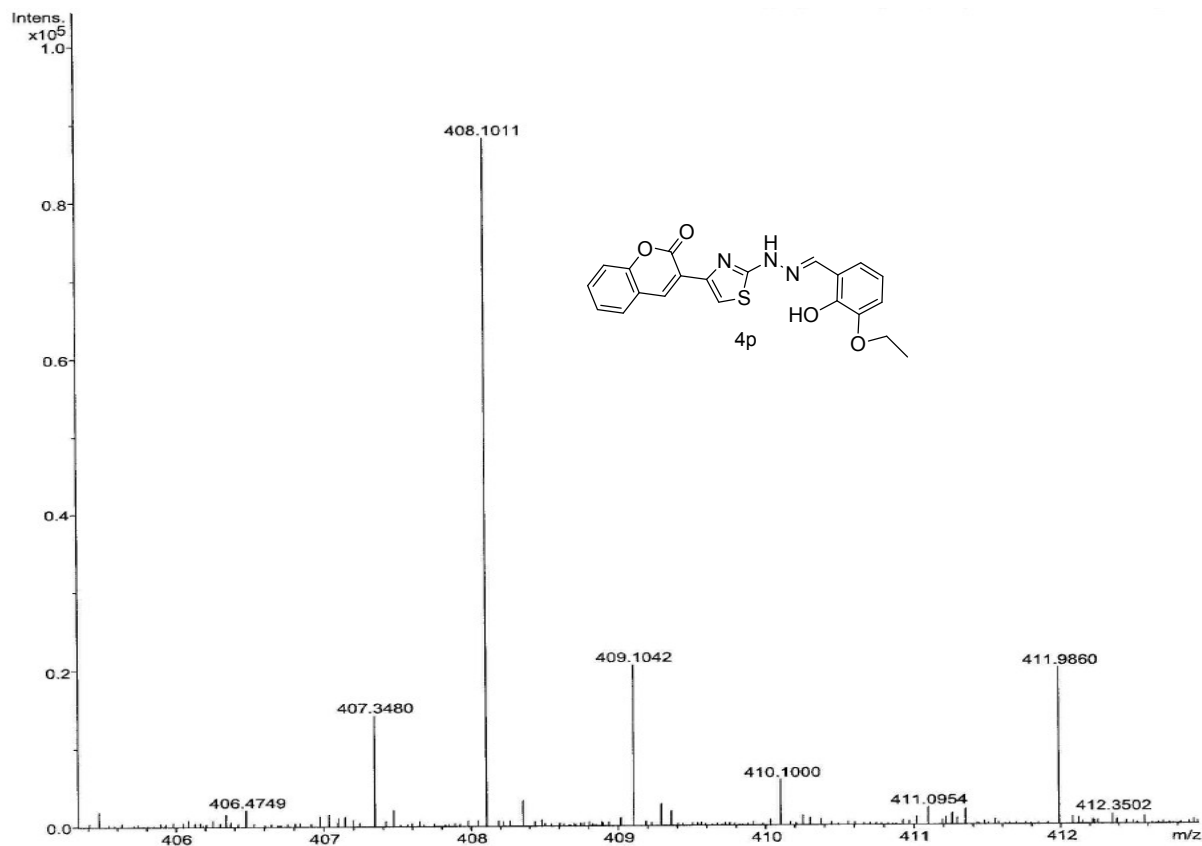

Figure S2-10. HRMS Spectrum of 4p



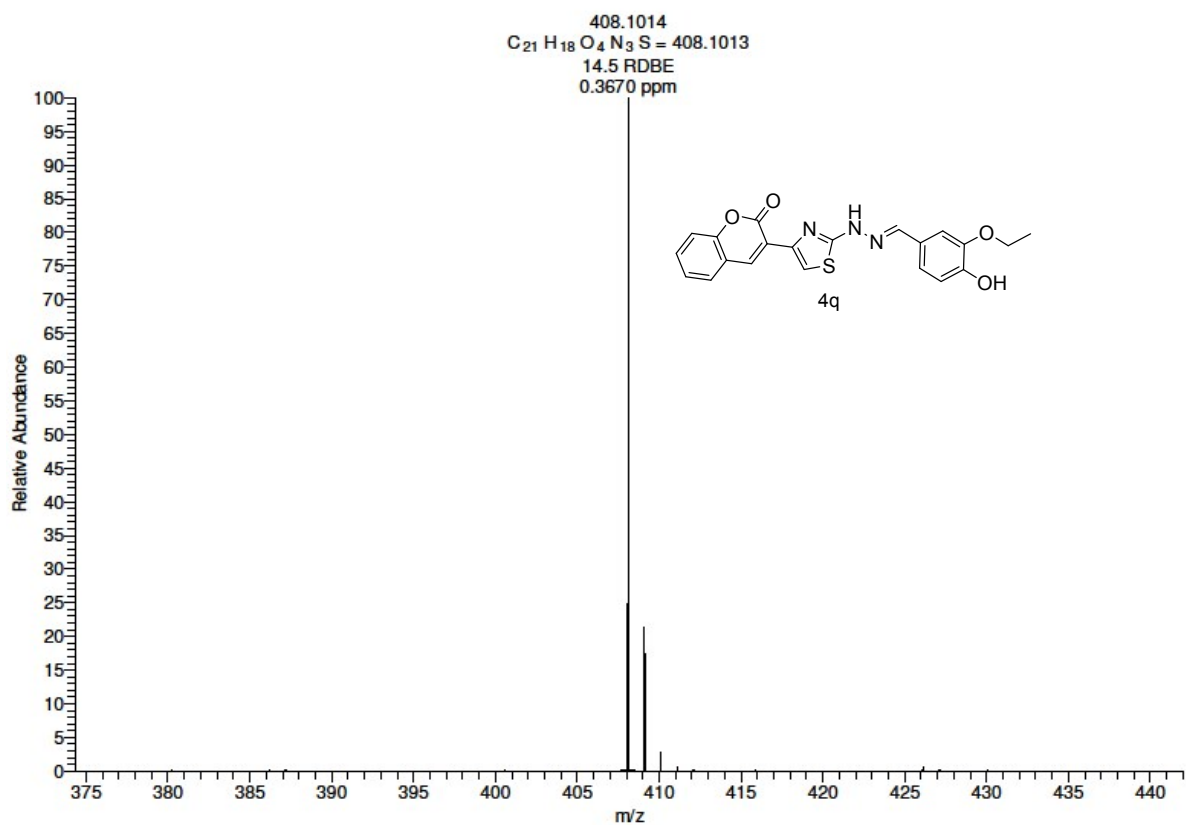

Figure S2-11. HRMS Spectrum of 4q

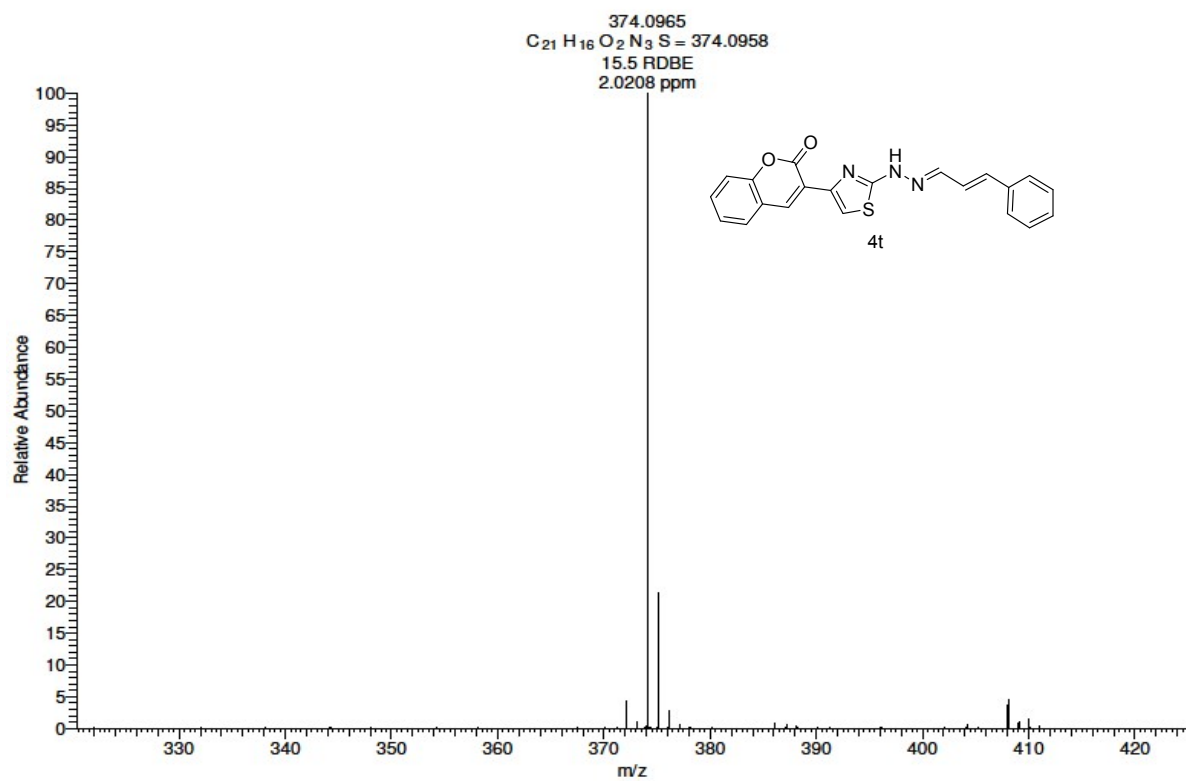

Figure S2-12. HRMS Spectrum of 4t

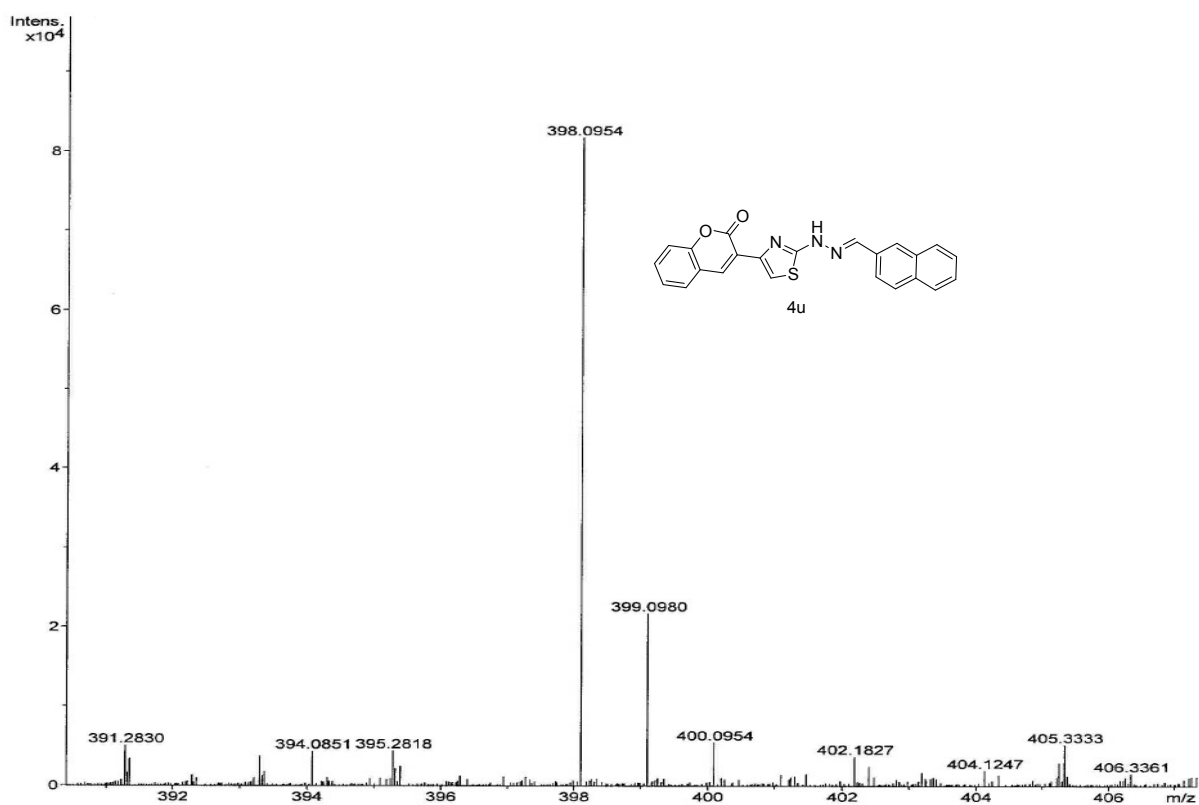

Figure S2-13. HRMS Spectrum of 4u

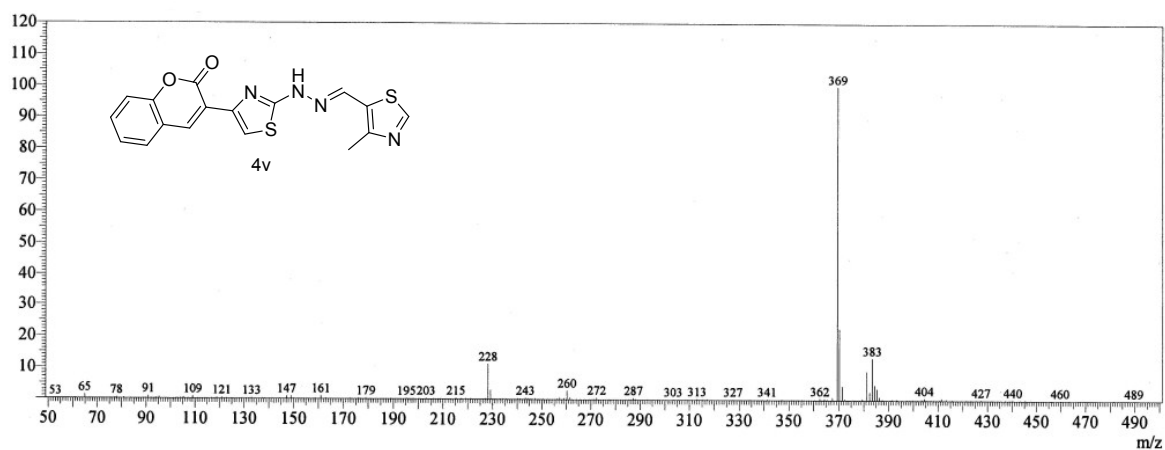

| Peak# | R.Time | I.Time | F.Time | Area      | Height   | A/H   | Mark | %Total | Name | Base m/z | Base Int. |
|-------|--------|--------|--------|-----------|----------|-------|------|--------|------|----------|-----------|
| 1     | 0.757  | 0.543  | 1.043  | 144297678 | 11667039 | 12.36 |      | 100.00 |      | 369.45   | 5468346   |
|       |        |        |        | 144297678 | 11667039 |       |      | 100.00 |      |          |           |

Figure S2-14. Mass Spectrum of 4v

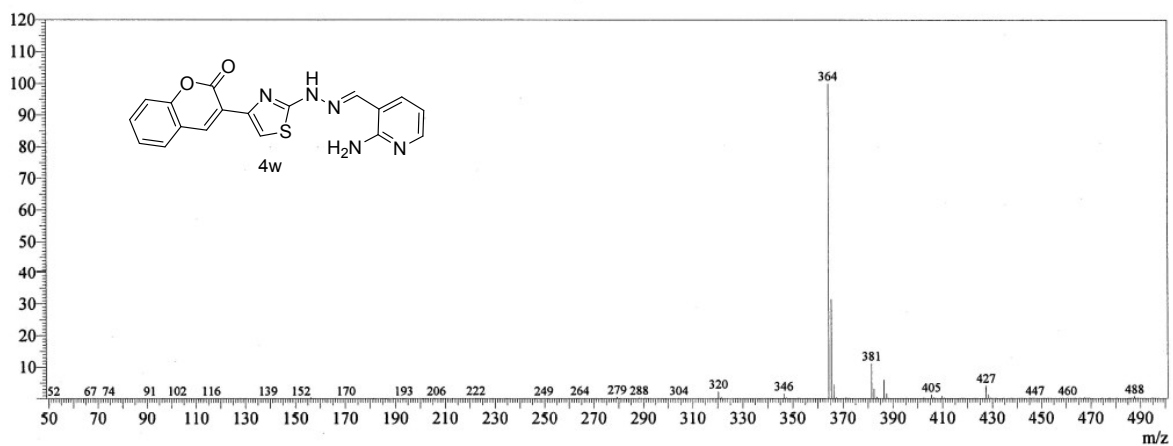

| Peak# | R.Time | I.Time | F.Time | Area     | Height  | A/H   | Mark | %Total | Name | Base m/z | Base Int. |
|-------|--------|--------|--------|----------|---------|-------|------|--------|------|----------|-----------|
| 1     | 0.897  | 0.527  | 1.043  | 83035536 | 3466592 | 23.95 |      | 100.00 |      | 364.40   | 10893080  |
|       |        |        |        | 83035536 | 3466592 |       |      | 100.00 |      |          |           |

Figure S2-15. 4w

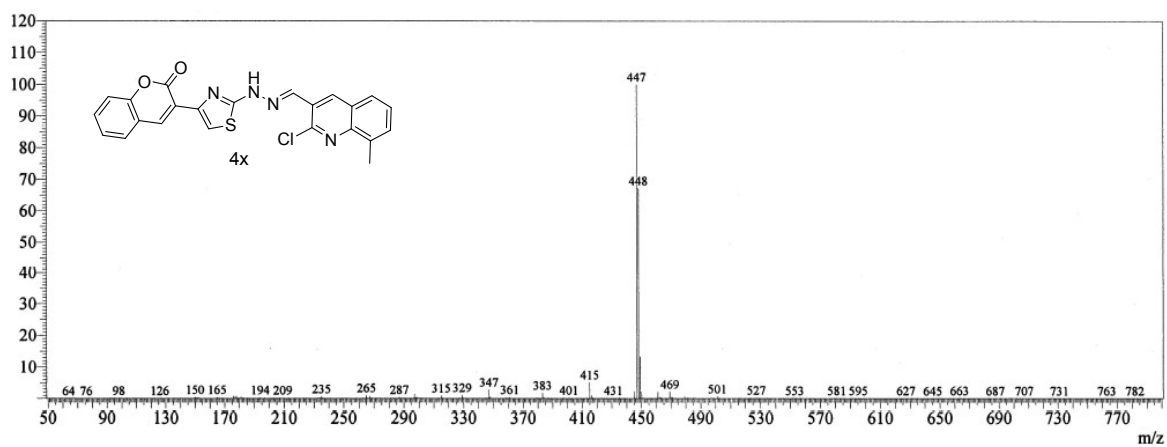

| Peak# | R.Time | I.Time | F.Time | Area      | Height   | A/H   | Mark | %Total | Name | Base m/z | Base Int. |
|-------|--------|--------|--------|-----------|----------|-------|------|--------|------|----------|-----------|
| 1     | 0.723  | 0.527  | 1.143  | 532960548 | 34447698 | 15.47 |      | 100.00 |      | 447.05   | 14824899  |
|       |        |        |        | 532960548 | 34447698 |       |      | 100.00 |      |          |           |

Figure S2-16. Mass Spectrum of 4x

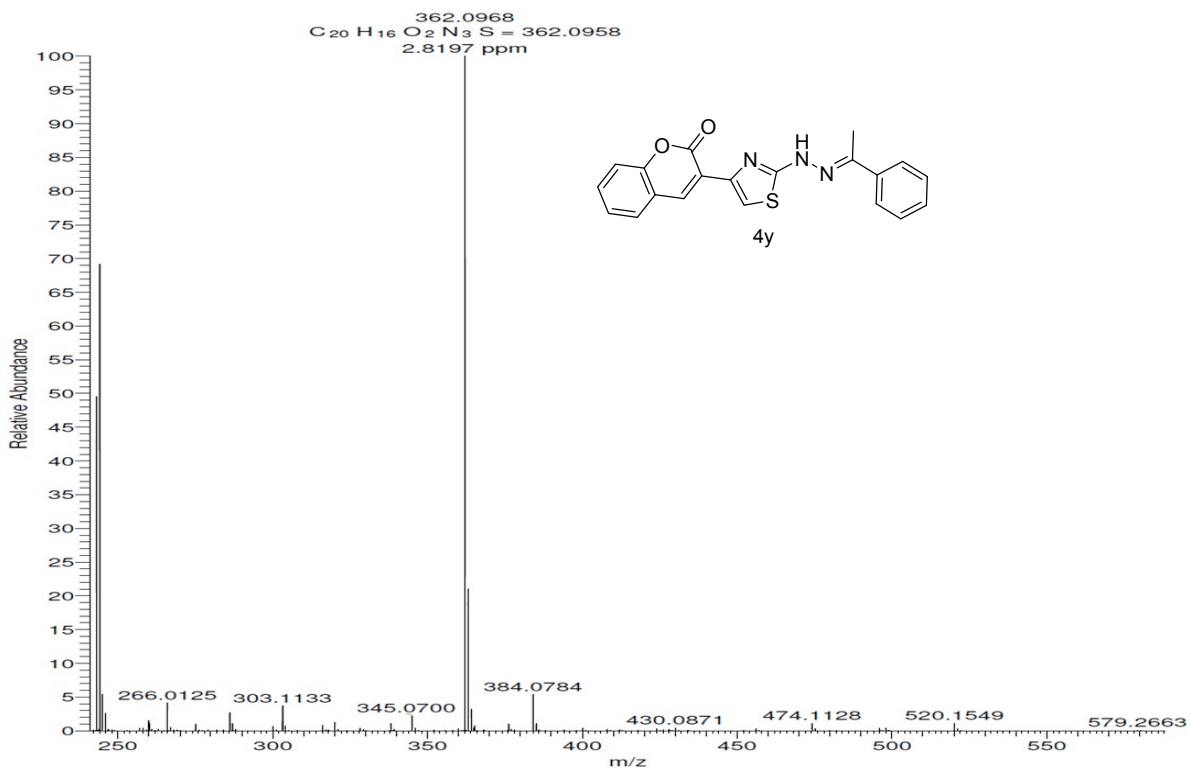

Figure S2-17. HRMS Spectrum of 4y

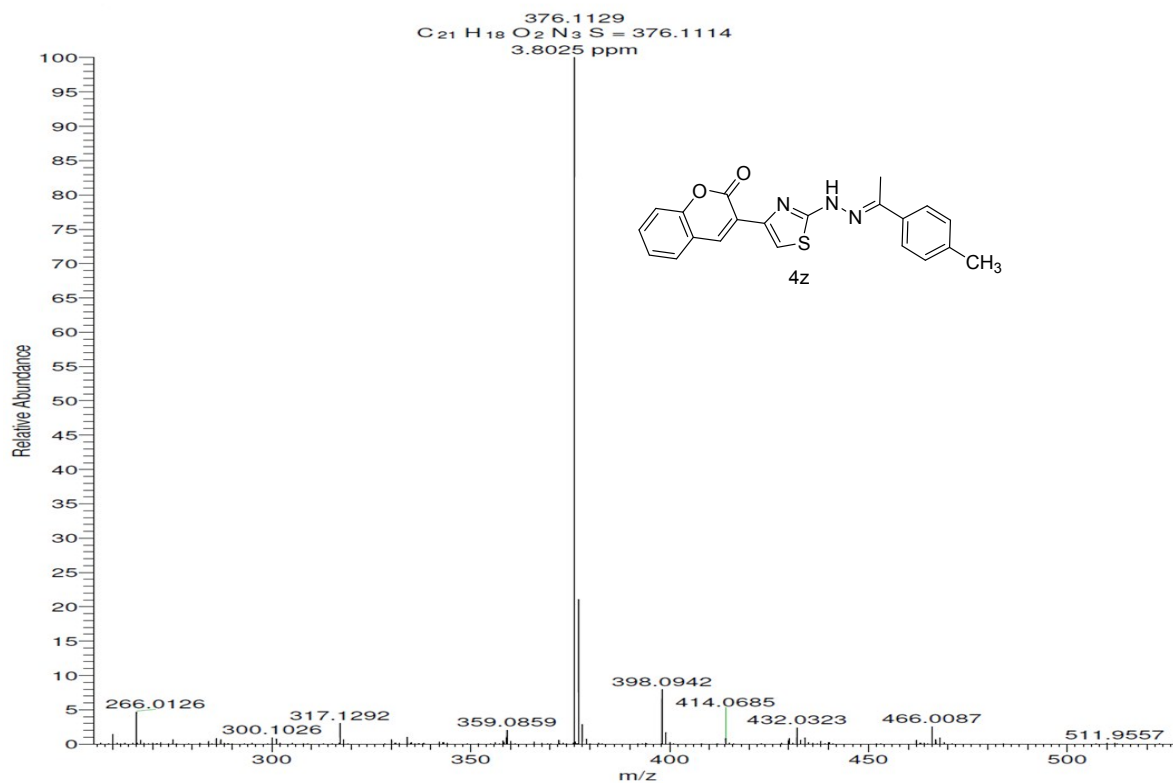

Figure S2-18. HRMS Spectrum of 4z

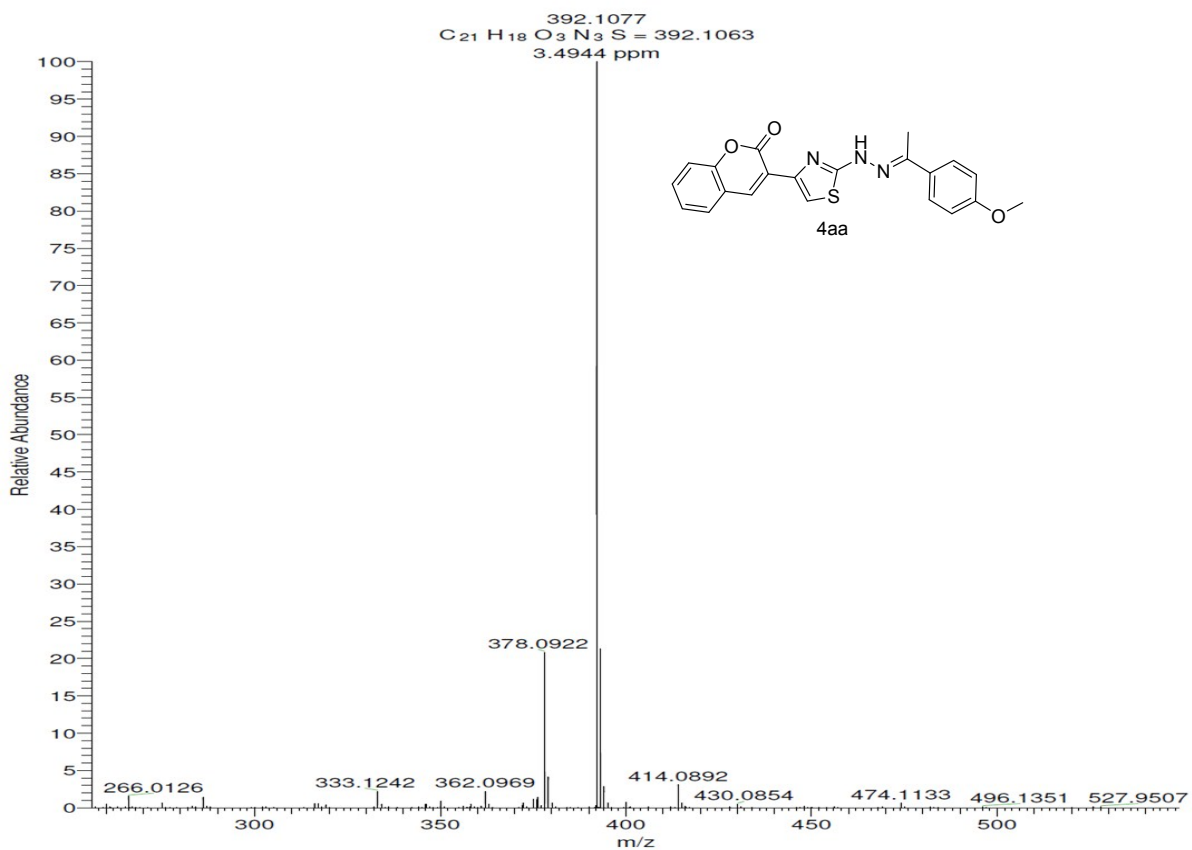

Figure S2-19. HRMS Spectrum of 4aa

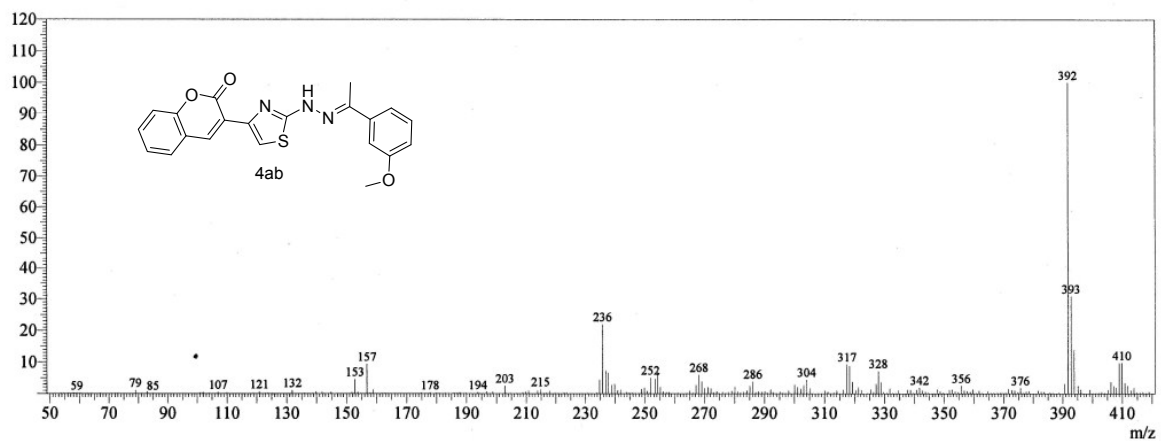

| Peak# | R.Time | I.Time | F.Time | Area     | Height | A/H   | Mark | %Total | Name | Base m/z | Base Int. |
|-------|--------|--------|--------|----------|--------|-------|------|--------|------|----------|-----------|
| 1     | 0.721  | 0.427  | 1.310  | 19790929 | 795722 | 24.87 |      | 100.00 |      | 391.80   | 150977    |
|       |        |        |        | 19790929 | 795722 |       |      | 100.00 |      |          |           |

Figure S2-20. Mass Spectrum of 4ab

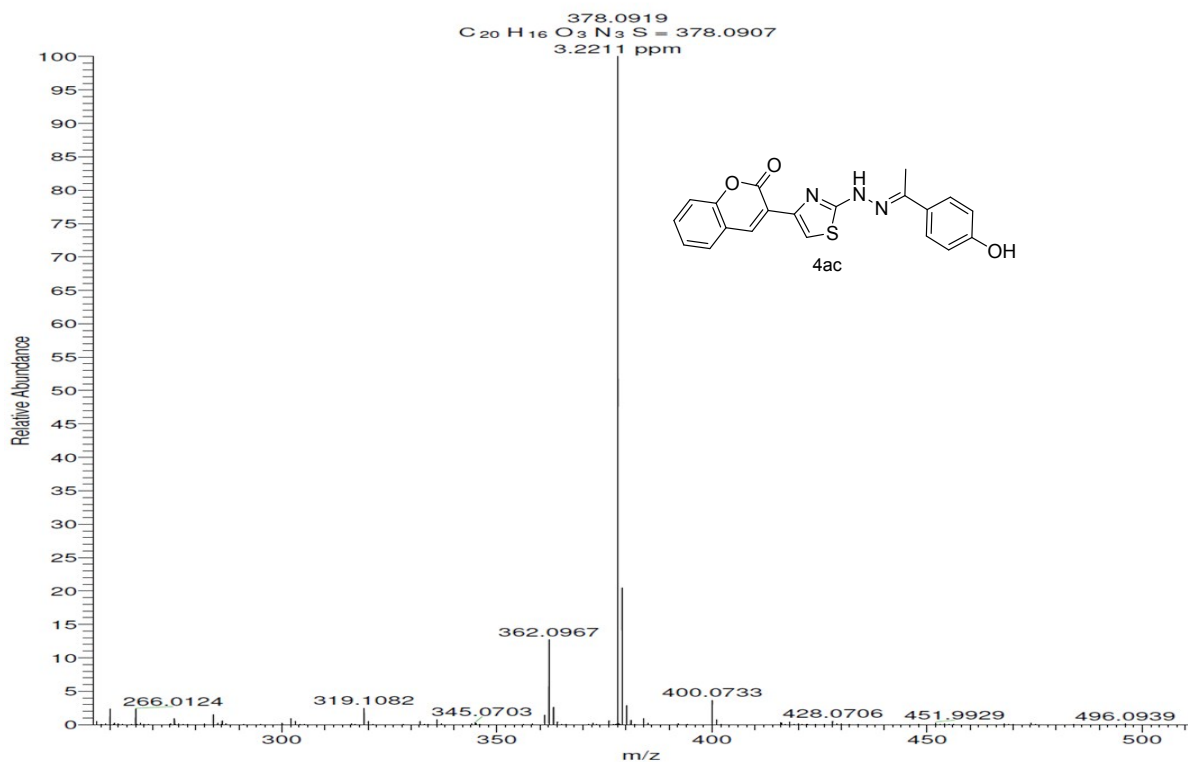

Figure S2-21. HRMS Spectrum of 4ac

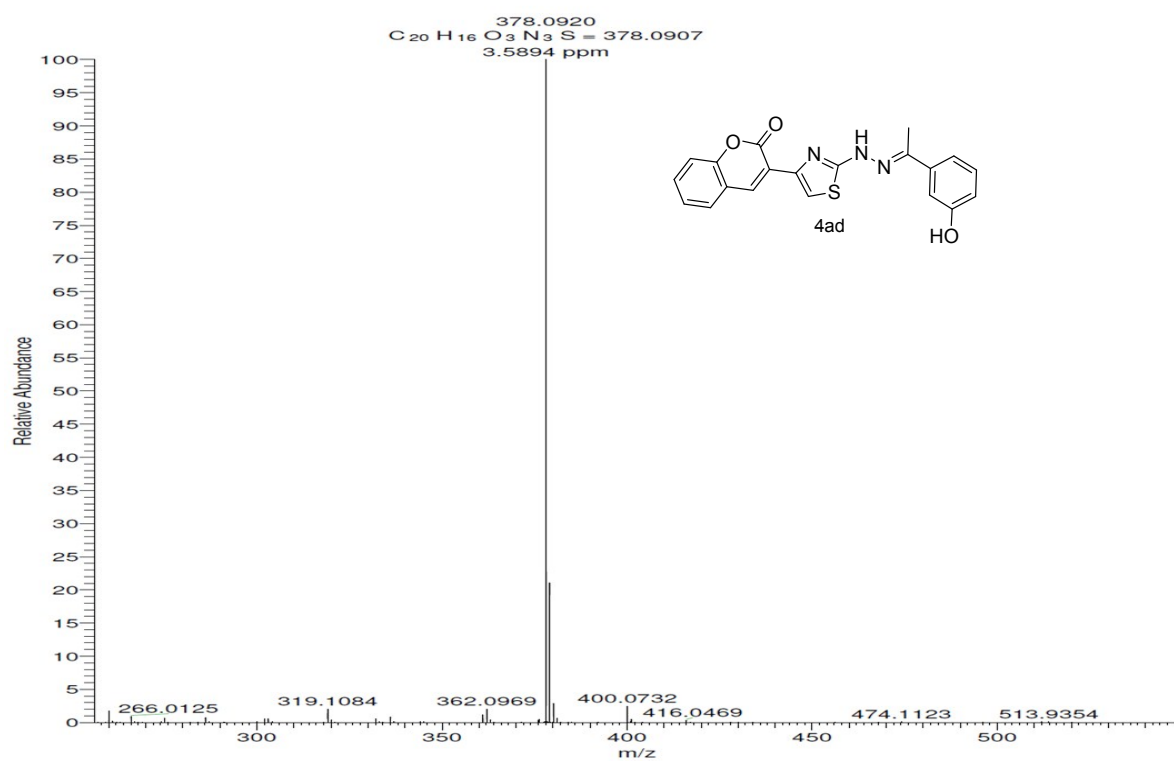

Figure S2-22. HRMS Spectrum of 4ad

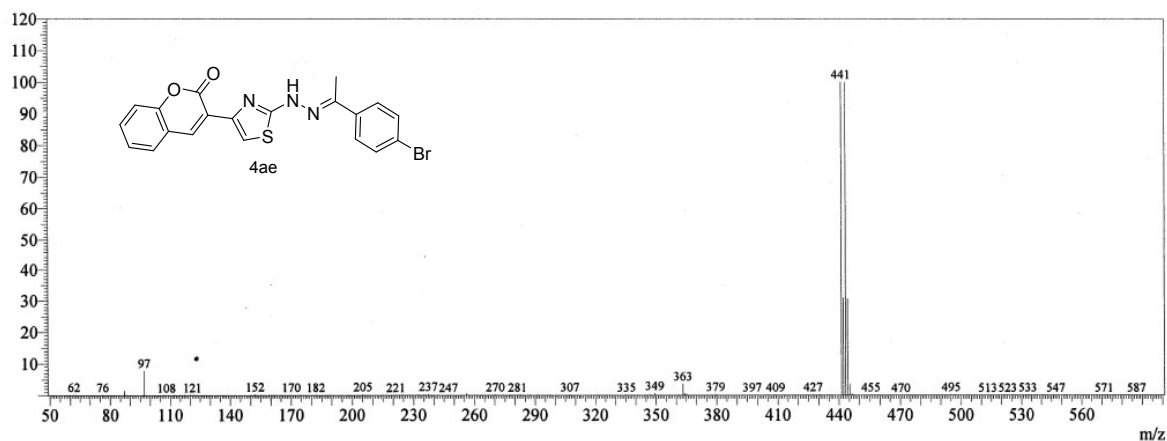

| Peak# | R.Time | I.Time | F.Time | Area      | Height  | A/H   | Mark | %Total | Name | Base m/z | Base Int. |
|-------|--------|--------|--------|-----------|---------|-------|------|--------|------|----------|-----------|
| 1     | 0.774  | 0.543  | 1.044  | 103453966 | 9084372 | 11.38 |      | 100.00 |      | 441.25   | 5042040   |
|       |        |        |        | 103453966 | 9084372 |       |      | 100.00 |      |          |           |

Figure S2-23. Mass Spectrum of 4ae

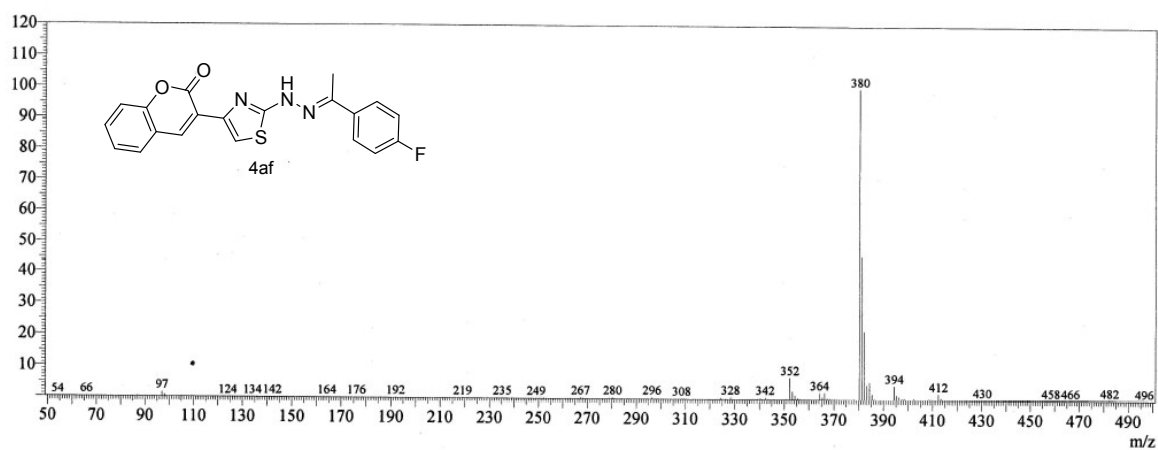

| Peak# | R.Time | I.Time | F.Time | Area      | Height   | A/H   | Mark | %Total | Name | Base m/z | Base Int. |
|-------|--------|--------|--------|-----------|----------|-------|------|--------|------|----------|-----------|
| 1     | 0.795  | 0.577  | 1.010  | 304473890 | 24751492 | 12.30 |      | 100.00 |      | 380.25   | 12304297  |
|       |        |        |        | 304473890 | 24751492 |       |      | 100.00 |      |          |           |

Figure S2-24. Mass Spectrum of 4af

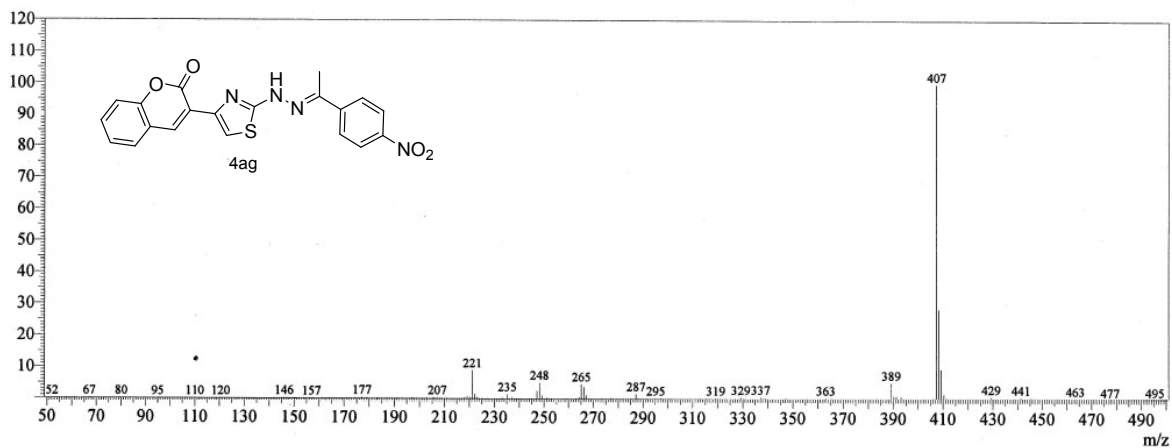

| Peak# | R.Time | I.Time | F.Time | Area      | Height   | A/H   | Mark | %Total | Name | Base m/z | Base Int. |
|-------|--------|--------|--------|-----------|----------|-------|------|--------|------|----------|-----------|
| 1     | 0.788  | 0.543  | 1.143  | 319395880 | 22705501 | 14.06 |      | 100.00 |      | 407.25   | 9909644   |
|       |        |        |        | 319395880 | 22705501 |       |      | 100.00 |      |          |           |

Figure S2-25. Mass Spectrum of 4ag

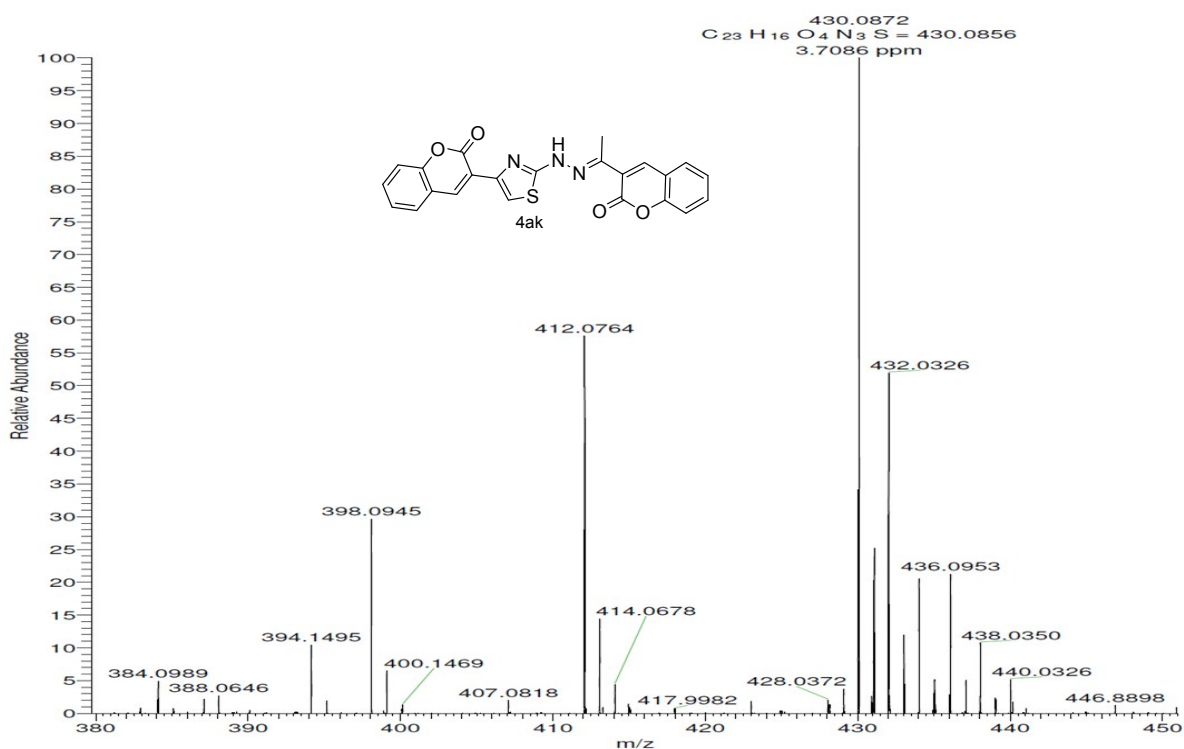

Figure S2-26. HRMS Spectrum of 4ak



## X-ray crystal structure and data of compound 4b

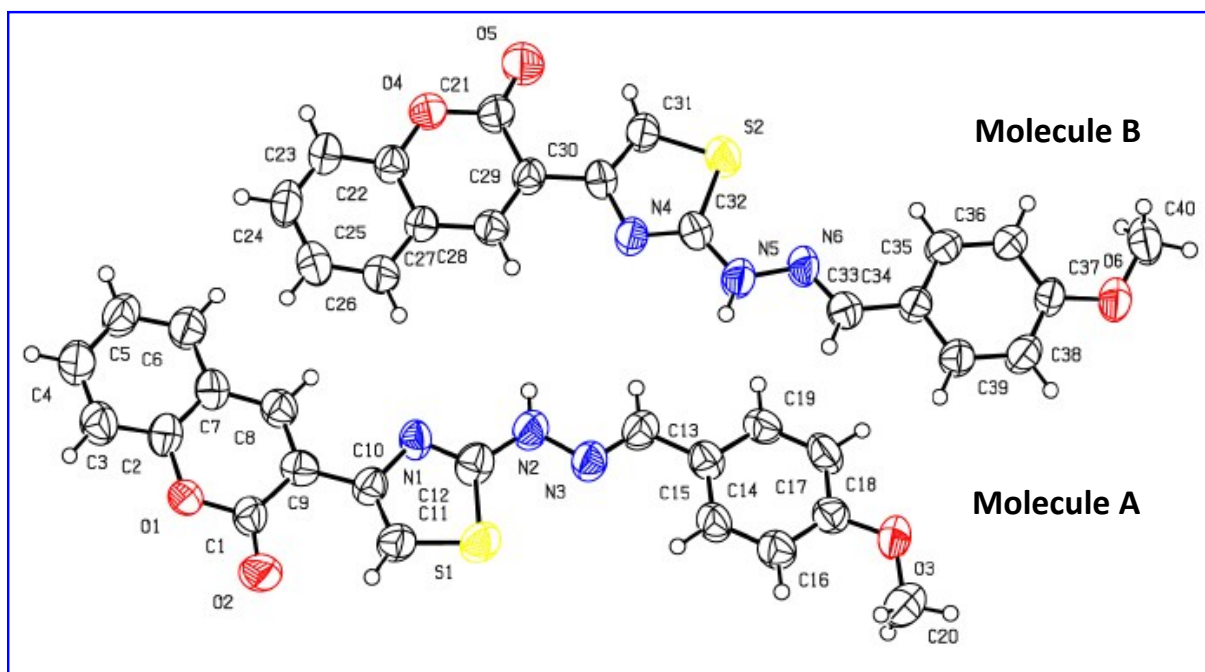

**Figure S3:** ORTEP diagram of (E)-3-(2-(2-(4-methoxybenzylidene) hydrazinyl)thiazol-4-yl)-2H- chromen-2-one (**4b**) (50 % probability)

**Table S1.** Crystal data and structure refinement for compound **4b**.

|                                 |                                                                 |                  |
|---------------------------------|-----------------------------------------------------------------|------------------|
| Identification code             | shelx                                                           |                  |
| Empirical formula               | C <sub>20</sub> H <sub>15</sub> N <sub>3</sub> O <sub>3</sub> S |                  |
| Formula weight                  | 377.41                                                          |                  |
| Temperature                     | 293(2) K                                                        |                  |
| Wavelength                      | 0.71073 Å                                                       |                  |
| Crystal system                  | Monoclinic                                                      |                  |
| Space group                     | P 21/c                                                          |                  |
| Unit cell dimensions            | a = 13.1185(7) Å                                                | a = 90°.         |
|                                 | b = 20.3561(7) Å                                                | b = 115.387(7)°. |
|                                 | c = 14.7486(10) Å                                               | g = 90°.         |
| Volume                          | 3558.2(4) Å <sup>3</sup>                                        |                  |
| Z                               | 8                                                               |                  |
| Density (calculated)            | 1.409 Mg/m <sup>3</sup>                                         |                  |
| Absorption coefficient          | 0.209 mm <sup>-1</sup>                                          |                  |
| F(000)                          | 1568                                                            |                  |
| Crystal size                    | ? x ? x ? mm <sup>3</sup>                                       |                  |
| Theta range for data collection | 1.988 to 24.998°.                                               |                  |
| Index ranges                    | -15 ≤ h ≤ 15, -24 ≤ k ≤ 24, -17 ≤ l ≤ 17                        |                  |

|                                   |                                             |
|-----------------------------------|---------------------------------------------|
| Reflections collected             | 33901                                       |
| Independent reflections           | 6260 [R(int) = 0.0642]                      |
| Completeness to theta = 24.998°   | 100.0 %                                     |
| Refinement method                 | Full-matrix least-squares on F <sup>2</sup> |
| Data / restraints / parameters    | 6260 / 0 / 489                              |
| Goodness-of-fit on F <sup>2</sup> | 0.914                                       |
| Final R indices [I>2sigma(I)]     | R1 = 0.0878, wR2 = 0.2082                   |
| R indices (all data)              | R1 = 0.1842, wR2 = 0.2701                   |
| Extinction coefficient            | n/a                                         |
| Largest diff. peak and hole       | 1.034 and -0.280 e.Å <sup>-3</sup>          |

**Table S2.** Atomic coordinates ( $\times 10^4$ ) and equivalent isotropic displacement parameters ( $\text{\AA}^2 \times 10^3$ ) for skd19a.  $U(\text{eq})$  is defined as one third of the trace of the orthogonalized  $U_{ij}$  tensor.

|       | x        | y       | z       | U(eq) |
|-------|----------|---------|---------|-------|
| S(2)  | 6104(1)  | 3150(1) | 6430(1) | 66(1) |
| S(1)  | -1072(1) | 4916(1) | 3631(1) | 73(1) |
| O(1)  | -1134(3) | 7884(2) | 3415(2) | 64(1) |
| O(4)  | 6038(3)  | 6127(2) | 6400(2) | 65(1) |
| O(6)  | 4795(3)  | -935(2) | 6078(3) | 78(1) |
| O(3)  | 197(3)   | 842(2)  | 3991(3) | 80(1) |
| N(1)  | 518(3)   | 5709(2) | 3720(3) | 57(1) |
| N(3)  | 638(4)   | 3963(2) | 3904(3) | 62(1) |
| N(4)  | 4466(3)  | 3932(2) | 6236(3) | 57(1) |
| N(6)  | 4447(3)  | 2194(2) | 6244(3) | 60(1) |
| O(5)  | 7126(3)  | 5264(2) | 6598(3) | 92(1) |
| N(5)  | 4050(3)  | 2815(2) | 6243(3) | 71(1) |
| O(2)  | -2209(3) | 7031(2) | 3238(3) | 85(1) |
| N(2)  | 1009(4)  | 4590(2) | 3883(3) | 72(1) |
| C(32) | 4746(4)  | 3312(3) | 6292(3) | 57(1) |
| C(30) | 5366(4)  | 4319(2) | 6302(3) | 51(1) |
| C(37) | 4644(4)  | -287(2) | 6166(3) | 56(1) |
| C(17) | 397(4)   | 1501(3) | 3973(3) | 58(1) |
| C(34) | 4108(4)  | 1032(2) | 6261(3) | 53(1) |
| C(14) | 989(4)   | 2812(2) | 3988(3) | 58(1) |
| C(10) | -416(4)  | 6084(2) | 3599(3) | 57(1) |
| C(28) | 4220(4)  | 5322(2) | 6088(3) | 55(1) |

|       |          |          |         |        |
|-------|----------|----------|---------|--------|
| C(27) | 4081(4)  | 6019(2)  | 6078(3) | 51(1)  |
| C(22) | 5020(4)  | 6408(2)  | 6255(3) | 57(1)  |
| C(7)  | 802(4)   | 7788(2)  | 3703(3) | 59(1)  |
| C(29) | 5214(4)  | 5031(2)  | 6258(3) | 52(1)  |
| C(12) | 265(4)   | 5090(3)  | 3752(4) | 65(2)  |
| C(15) | -64(4)   | 2643(2)  | 3903(4) | 65(1)  |
| C(2)  | -113(5)  | 8179(2)  | 3554(4) | 61(1)  |
| C(35) | 5181(4)  | 842(2)   | 6407(3) | 62(1)  |
| C(8)  | 672(4)   | 7099(2)  | 3701(3) | 58(1)  |
| C(38) | 3579(4)  | -114(2)  | 6045(4) | 67(1)  |
| C(33) | 3798(4)  | 1718(2)  | 6274(3) | 62(1)  |
| C(39) | 3310(4)  | 537(2)   | 6094(3) | 61(1)  |
| C(9)  | -300(4)  | 6802(2)  | 3574(3) | 55(1)  |
| C(18) | 1445(4)  | 1656(3)  | 4049(4) | 68(1)  |
| C(36) | 5457(4)  | 193(2)   | 6361(3) | 62(1)  |
| C(23) | 5003(5)  | 7078(3)  | 6291(4) | 70(2)  |
| C(21) | 6193(4)  | 5454(3)  | 6438(4) | 63(1)  |
| C(13) | 1320(5)  | 3509(2)  | 3986(4) | 68(2)  |
| C(1)  | -1266(4) | 7221(2)  | 3409(4) | 61(1)  |
| C(16) | -360(4)  | 1984(3)  | 3896(4) | 67(1)  |
| C(19) | 1739(4)  | 2309(3)  | 4057(3) | 66(1)  |
| C(3)  | -105(5)  | 8852(3)  | 3544(4) | 73(2)  |
| C(24) | 4034(5)  | 7384(2)  | 6171(4) | 73(2)  |
| C(31) | 6298(4)  | 3974(2)  | 6407(3) | 60(1)  |
| C(6)  | 1788(5)  | 8124(3)  | 3848(4) | 71(2)  |
| C(26) | 3094(4)  | 6339(3)  | 5942(4) | 71(2)  |
| C(4)  | 873(5)   | 9163(3)  | 3680(4) | 76(2)  |
| C(25) | 3083(5)  | 7017(3)  | 5985(4) | 77(2)  |
| C(5)  | 1823(5)  | 8797(3)  | 3837(4) | 79(2)  |
| C(11) | -1318(4) | 5742(2)  | 3554(3) | 68(2)  |
| C(40) | 5895(5)  | -1142(3) | 6216(4) | 89(2)  |
| C(20) | -933(5)  | 640(3)   | 3742(4) | 103(2) |

---

**Table S3.** Bond lengths [Å] and angles [°] for skd19a.

---

|             |          |
|-------------|----------|
| S(2)-C(31)  | 1.699(4) |
| S(2)-C(32)  | 1.737(5) |
| S(1)-C(11)  | 1.707(5) |
| S(1)-C(12)  | 1.722(5) |
| O(1)-C(1)   | 1.361(5) |
| O(1)-C(2)   | 1.401(6) |
| O(4)-C(21)  | 1.382(5) |
| O(4)-C(22)  | 1.383(5) |
| O(6)-C(37)  | 1.349(5) |
| O(6)-C(40)  | 1.432(5) |
| O(3)-C(17)  | 1.369(5) |
| O(3)-C(20)  | 1.427(6) |
| N(1)-C(12)  | 1.309(6) |
| N(1)-C(10)  | 1.390(5) |
| N(3)-C(13)  | 1.256(6) |
| N(3)-N(2)   | 1.371(5) |
| N(4)-C(32)  | 1.308(5) |
| N(4)-C(30)  | 1.387(5) |
| N(6)-C(33)  | 1.303(5) |
| N(6)-N(5)   | 1.368(5) |
| O(5)-C(21)  | 1.207(5) |
| N(5)-C(32)  | 1.343(6) |
| N(5)-H(5)   | 0.8600   |
| O(2)-C(1)   | 1.215(5) |
| N(2)-C(12)  | 1.365(6) |
| N(2)-H(2)   | 0.8600   |
| C(30)-C(31) | 1.361(6) |
| C(30)-C(29) | 1.460(6) |
| C(37)-C(38) | 1.376(6) |
| C(37)-C(36) | 1.383(6) |
| C(17)-C(16) | 1.367(6) |
| C(17)-C(18) | 1.368(6) |
| C(34)-C(35) | 1.384(6) |
| C(34)-C(39) | 1.396(6) |
| C(34)-C(33) | 1.457(6) |
| C(14)-C(15) | 1.376(6) |
| C(14)-C(19) | 1.393(6) |

|             |          |
|-------------|----------|
| C(14)-C(13) | 1.484(6) |
| C(10)-C(11) | 1.350(6) |
| C(10)-C(9)  | 1.471(6) |
| C(28)-C(29) | 1.354(6) |
| C(28)-C(27) | 1.429(6) |
| C(28)-H(28) | 0.9300   |
| C(27)-C(26) | 1.385(6) |
| C(27)-C(22) | 1.392(6) |
| C(22)-C(23) | 1.365(6) |
| C(7)-C(2)   | 1.377(6) |
| C(7)-C(6)   | 1.396(6) |
| C(7)-C(8)   | 1.412(6) |
| C(29)-C(21) | 1.473(6) |
| C(15)-C(16) | 1.395(6) |
| C(15)-H(15) | 0.9300   |
| C(2)-C(3)   | 1.370(6) |
| C(35)-C(36) | 1.379(6) |
| C(35)-H(35) | 0.9300   |
| C(8)-C(9)   | 1.351(6) |
| C(8)-H(8)   | 0.9300   |
| C(38)-C(39) | 1.380(6) |
| C(38)-H(38) | 0.9300   |
| C(33)-H(33) | 0.9300   |
| C(39)-H(39) | 0.9300   |
| C(9)-C(1)   | 1.459(6) |
| C(18)-C(19) | 1.383(6) |
| C(18)-H(18) | 0.9300   |
| C(36)-H(36) | 0.9300   |
| C(23)-C(24) | 1.357(6) |
| C(23)-H(23) | 0.9300   |
| C(13)-H(13) | 0.9300   |
| C(16)-H(16) | 0.9300   |
| C(19)-H(19) | 0.9300   |
| C(3)-C(4)   | 1.366(7) |
| C(3)-H(3)   | 0.9300   |
| C(24)-C(25) | 1.376(7) |
| C(24)-H(24) | 0.9300   |
| C(31)-H(31) | 0.9300   |
| C(6)-C(5)   | 1.371(6) |

|                   |          |
|-------------------|----------|
| C(6)-H(6)         | 0.9300   |
| C(26)-C(25)       | 1.382(6) |
| C(26)-H(26)       | 0.9300   |
| C(4)-C(5)         | 1.383(7) |
| C(4)-H(4)         | 0.9300   |
| C(25)-H(25)       | 0.9300   |
| C(5)-H(5A)        | 0.9300   |
| C(11)-H(11)       | 0.9300   |
| C(40)-H(40A)      | 0.9600   |
| C(40)-H(40B)      | 0.9600   |
| C(40)-H(40C)      | 0.9600   |
| C(20)-H(20A)      | 0.9600   |
| C(20)-H(20B)      | 0.9600   |
| C(20)-H(20C)      | 0.9600   |
| C(31)-S(2)-C(32)  | 88.0(2)  |
| C(11)-S(1)-C(12)  | 87.7(3)  |
| C(1)-O(1)-C(2)    | 122.5(4) |
| C(21)-O(4)-C(22)  | 122.2(4) |
| C(37)-O(6)-C(40)  | 117.1(4) |
| C(17)-O(3)-C(20)  | 117.6(4) |
| C(12)-N(1)-C(10)  | 108.1(4) |
| C(13)-N(3)-N(2)   | 116.2(4) |
| C(32)-N(4)-C(30)  | 109.7(4) |
| C(33)-N(6)-N(5)   | 115.7(4) |
| C(32)-N(5)-N(6)   | 116.5(4) |
| C(32)-N(5)-H(5)   | 121.7    |
| N(6)-N(5)-H(5)    | 121.7    |
| C(12)-N(2)-N(3)   | 117.2(4) |
| C(12)-N(2)-H(2)   | 121.4    |
| N(3)-N(2)-H(2)    | 121.4    |
| N(4)-C(32)-N(5)   | 123.9(4) |
| N(4)-C(32)-S(2)   | 115.9(4) |
| N(5)-C(32)-S(2)   | 120.2(4) |
| C(31)-C(30)-N(4)  | 114.2(4) |
| C(31)-C(30)-C(29) | 128.1(4) |
| N(4)-C(30)-C(29)  | 117.7(4) |
| O(6)-C(37)-C(38)  | 114.9(4) |
| O(6)-C(37)-C(36)  | 125.4(5) |
| C(38)-C(37)-C(36) | 119.7(5) |

|                   |          |
|-------------------|----------|
| C(16)-C(17)-C(18) | 120.7(5) |
| C(16)-C(17)-O(3)  | 124.6(5) |
| C(18)-C(17)-O(3)  | 114.7(5) |
| C(35)-C(34)-C(39) | 117.5(4) |
| C(35)-C(34)-C(33) | 122.4(4) |
| C(39)-C(34)-C(33) | 120.1(4) |
| C(15)-C(14)-C(19) | 118.2(5) |
| C(15)-C(14)-C(13) | 121.5(4) |
| C(19)-C(14)-C(13) | 120.3(5) |
| C(11)-C(10)-N(1)  | 115.4(5) |
| C(11)-C(10)-C(9)  | 127.5(5) |
| N(1)-C(10)-C(9)   | 117.0(4) |
| C(29)-C(28)-C(27) | 123.0(4) |
| C(29)-C(28)-H(28) | 118.5    |
| C(27)-C(28)-H(28) | 118.5    |
| C(26)-C(27)-C(22) | 117.1(5) |
| C(26)-C(27)-C(28) | 125.1(4) |
| C(22)-C(27)-C(28) | 117.7(4) |
| C(23)-C(22)-O(4)  | 116.0(5) |
| C(23)-C(22)-C(27) | 123.2(5) |
| O(4)-C(22)-C(27)  | 120.8(4) |
| C(2)-C(7)-C(6)    | 115.4(5) |
| C(2)-C(7)-C(8)    | 118.5(5) |
| C(6)-C(7)-C(8)    | 126.1(5) |
| C(28)-C(29)-C(30) | 123.0(4) |
| C(28)-C(29)-C(21) | 118.3(4) |
| C(30)-C(29)-C(21) | 118.7(4) |
| N(1)-C(12)-N(2)   | 123.1(5) |
| N(1)-C(12)-S(1)   | 117.2(4) |
| N(2)-C(12)-S(1)   | 119.7(4) |
| C(14)-C(15)-C(16) | 120.5(5) |
| C(14)-C(15)-H(15) | 119.8    |
| C(16)-C(15)-H(15) | 119.8    |
| C(3)-C(2)-C(7)    | 124.7(5) |
| C(3)-C(2)-O(1)    | 116.0(5) |
| C(7)-C(2)-O(1)    | 119.3(5) |
| C(36)-C(35)-C(34) | 122.0(5) |
| C(36)-C(35)-H(35) | 119.0    |
| C(34)-C(35)-H(35) | 119.0    |

|                   |          |
|-------------------|----------|
| C(9)-C(8)-C(7)    | 123.5(5) |
| C(9)-C(8)-H(8)    | 118.3    |
| C(7)-C(8)-H(8)    | 118.3    |
| C(37)-C(38)-C(39) | 120.4(5) |
| C(37)-C(38)-H(38) | 119.8    |
| C(39)-C(38)-H(38) | 119.8    |
| N(6)-C(33)-C(34)  | 121.5(4) |
| N(6)-C(33)-H(33)  | 119.3    |
| C(34)-C(33)-H(33) | 119.3    |
| C(38)-C(39)-C(34) | 120.8(4) |
| C(38)-C(39)-H(39) | 119.6    |
| C(34)-C(39)-H(39) | 119.6    |
| C(8)-C(9)-C(1)    | 117.5(5) |
| C(8)-C(9)-C(10)   | 122.9(4) |
| C(1)-C(9)-C(10)   | 119.6(4) |
| C(17)-C(18)-C(19) | 119.3(5) |
| C(17)-C(18)-H(18) | 120.4    |
| C(19)-C(18)-H(18) | 120.4    |
| C(35)-C(36)-C(37) | 119.4(5) |
| C(35)-C(36)-H(36) | 120.3    |
| C(37)-C(36)-H(36) | 120.3    |
| C(24)-C(23)-C(22) | 118.9(5) |
| C(24)-C(23)-H(23) | 120.6    |
| C(22)-C(23)-H(23) | 120.6    |
| O(5)-C(21)-O(4)   | 116.5(4) |
| O(5)-C(21)-C(29)  | 125.5(5) |
| O(4)-C(21)-C(29)  | 118.0(4) |
| N(3)-C(13)-C(14)  | 120.4(5) |
| N(3)-C(13)-H(13)  | 119.8    |
| C(14)-C(13)-H(13) | 119.8    |
| O(2)-C(1)-O(1)    | 115.6(4) |
| O(2)-C(1)-C(9)    | 125.6(5) |
| O(1)-C(1)-C(9)    | 118.8(4) |
| C(17)-C(16)-C(15) | 120.0(5) |
| C(17)-C(16)-H(16) | 120.0    |
| C(15)-C(16)-H(16) | 120.0    |
| C(18)-C(19)-C(14) | 121.4(5) |
| C(18)-C(19)-H(19) | 119.3    |
| C(14)-C(19)-H(19) | 119.3    |



|                     |          |
|---------------------|----------|
| C(4)-C(3)-C(2)      | 118.2(5) |
| C(4)-C(3)-H(3)      | 120.9    |
| C(2)-C(3)-H(3)      | 120.9    |
| C(23)-C(24)-C(25)   | 119.7(5) |
| C(23)-C(24)-H(24)   | 120.1    |
| C(25)-C(24)-H(24)   | 120.1    |
| C(30)-C(31)-S(2)    | 112.2(4) |
| C(30)-C(31)-H(31)   | 123.9    |
| S(2)-C(31)-H(31)    | 123.9    |
| C(5)-C(6)-C(7)      | 121.3(5) |
| C(5)-C(6)-H(6)      | 119.3    |
| C(7)-C(6)-H(6)      | 119.3    |
| C(25)-C(26)-C(27)   | 119.4(5) |
| C(25)-C(26)-H(26)   | 120.3    |
| C(27)-C(26)-H(26)   | 120.3    |
| C(3)-C(4)-C(5)      | 119.8(5) |
| C(3)-C(4)-H(4)      | 120.1    |
| C(5)-C(4)-H(4)      | 120.1    |
| C(24)-C(25)-C(26)   | 121.6(5) |
| C(24)-C(25)-H(25)   | 119.2    |
| C(26)-C(25)-H(25)   | 119.2    |
| C(6)-C(5)-C(4)      | 120.6(5) |
| C(6)-C(5)-H(5A)     | 119.7    |
| C(4)-C(5)-H(5A)     | 119.7    |
| C(10)-C(11)-S(1)    | 111.6(4) |
| C(10)-C(11)-H(11)   | 124.2    |
| S(1)-C(11)-H(11)    | 124.2    |
| O(6)-C(40)-H(40A)   | 109.5    |
| O(6)-C(40)-H(40B)   | 109.5    |
| H(40A)-C(40)-H(40B) | 109.5    |
| O(6)-C(40)-H(40C)   | 109.5    |
| H(40A)-C(40)-H(40C) | 109.5    |
| H(40B)-C(40)-H(40C) | 109.5    |
| O(3)-C(20)-H(20A)   | 109.5    |
| O(3)-C(20)-H(20B)   | 109.5    |
| H(20A)-C(20)-H(20B) | 109.5    |
| O(3)-C(20)-H(20C)   | 109.5    |
| H(20A)-C(20)-H(20C) | 109.5    |
| H(20B)-C(20)-H(20C) | 109.5    |

**Table S4.** Anisotropic displacement parameters ( $\text{\AA}^2 \times 10^3$ ) for skd19a. The anisotropic displacement factor exponent takes the form:  $-2p^2 [ h^2 a^* 2U^{11} + \dots + 2 h k a^* b^* U^{12} ]$

|       | U11   | U22   | U33    | U23    | U13   | U12    |
|-------|-------|-------|--------|--------|-------|--------|
| S(2)  | 65(1) | 55(1) | 89(1)  | 1(1)   | 43(1) | 9(1)   |
| S(1)  | 68(1) | 64(1) | 100(1) | -2(1)  | 48(1) | -11(1) |
| O(1)  | 51(2) | 55(2) | 87(3)  | -6(2)  | 32(2) | 5(2)   |
| O(4)  | 55(2) | 60(2) | 86(3)  | 4(2)   | 35(2) | -3(2)  |
| O(6)  | 83(3) | 46(2) | 110(3) | -1(2)  | 45(2) | 3(2)   |
| O(3)  | 77(3) | 43(2) | 123(3) | 9(2)   | 44(2) | -1(2)  |
| N(1)  | 67(3) | 42(3) | 70(3)  | -2(2)  | 39(2) | 5(2)   |
| N(3)  | 67(3) | 51(3) | 76(3)  | 3(2)   | 38(2) | -2(2)  |
| N(4)  | 63(3) | 45(3) | 70(3)  | 0(2)   | 34(2) | -1(2)  |
| N(6)  | 67(3) | 43(3) | 75(3)  | -7(2)  | 34(2) | 5(2)   |
| O(5)  | 67(3) | 74(3) | 153(4) | 11(2)  | 64(3) | 4(2)   |
| N(5)  | 63(3) | 47(3) | 111(4) | -7(2)  | 46(3) | -2(2)  |
| O(2)  | 57(2) | 79(3) | 124(3) | -21(2) | 44(2) | -1(2)  |
| N(2)  | 66(3) | 51(3) | 110(4) | -1(3)  | 50(3) | -4(2)  |
| C(32) | 60(3) | 52(3) | 62(3)  | 1(3)   | 28(3) | 9(3)   |
| C(30) | 63(3) | 44(3) | 55(3)  | 4(2)   | 32(3) | 8(3)   |
| C(37) | 65(4) | 38(3) | 67(3)  | -2(2)  | 33(3) | -2(2)  |
| C(17) | 54(3) | 59(4) | 60(3)  | 7(3)   | 25(3) | 3(3)   |
| C(34) | 56(3) | 45(3) | 65(3)  | -2(2)  | 33(3) | -2(2)  |
| C(14) | 59(3) | 57(3) | 64(3)  | 5(3)   | 31(3) | 9(3)   |
| C(10) | 63(3) | 51(3) | 64(3)  | -2(3)  | 34(3) | -4(3)  |
| C(28) | 53(3) | 53(3) | 62(3)  | 2(2)   | 28(3) | 2(2)   |
| C(27) | 55(3) | 46(3) | 54(3)  | 3(2)   | 24(3) | -1(2)  |
| C(22) | 62(3) | 51(3) | 62(3)  | 2(2)   | 32(3) | -1(3)  |
| C(7)  | 67(4) | 50(3) | 64(3)  | -2(3)  | 31(3) | 5(3)   |
| C(29) | 57(3) | 44(3) | 65(3)  | 4(2)   | 34(3) | -2(2)  |
| C(12) | 76(4) | 61(4) | 72(4)  | 0(3)   | 46(3) | -6(3)  |
| C(15) | 59(3) | 54(3) | 94(4)  | 6(3)   | 44(3) | 10(3)  |
| C(2)  | 81(4) | 48(3) | 58(3)  | -3(3)  | 34(3) | 0(3)   |
| C(35) | 56(3) | 57(3) | 73(4)  | -9(3)  | 28(3) | -10(3) |
| C(8)  | 59(3) | 56(3) | 66(3)  | -2(3)  | 32(3) | 4(3)   |
| C(38) | 69(4) | 51(3) | 87(4)  | -9(3)  | 38(3) | -13(3) |
| C(33) | 59(3) | 53(3) | 74(4)  | -6(3)  | 30(3) | 4(3)   |
| C(39) | 59(3) | 51(3) | 82(4)  | -1(3)  | 39(3) | -1(3)  |

|       |       |       |        |        |       |        |
|-------|-------|-------|--------|--------|-------|--------|
| C(9)  | 52(3) | 64(4) | 52(3)  | -6(2)  | 25(3) | 2(3)   |
| C(18) | 60(3) | 62(4) | 82(4)  | 9(3)   | 31(3) | 21(3)  |
| C(36) | 54(3) | 50(3) | 82(4)  | -6(3)  | 28(3) | -6(3)  |
| C(23) | 76(4) | 47(4) | 82(4)  | 4(3)   | 30(3) | -1(3)  |
| C(21) | 60(4) | 58(4) | 84(4)  | 5(3)   | 43(3) | -2(3)  |
| C(13) | 69(4) | 57(4) | 84(4)  | 2(3)   | 38(3) | -8(3)  |
| C(1)  | 64(4) | 49(4) | 76(4)  | -7(3)  | 36(3) | 3(3)   |
| C(16) | 62(3) | 64(4) | 84(4)  | 6(3)   | 39(3) | 6(3)   |
| C(19) | 48(3) | 68(4) | 85(4)  | 9(3)   | 30(3) | 7(3)   |
| C(3)  | 79(4) | 60(4) | 85(4)  | -5(3)  | 40(3) | 10(3)  |
| C(24) | 94(5) | 39(3) | 83(4)  | 0(3)   | 34(4) | 0(3)   |
| C(31) | 61(3) | 45(3) | 81(4)  | 1(3)   | 38(3) | 0(2)   |
| C(6)  | 74(4) | 59(4) | 86(4)  | 1(3)   | 39(3) | -2(3)  |
| C(26) | 58(3) | 58(4) | 99(4)  | 7(3)   | 35(3) | 2(3)   |
| C(4)  | 86(5) | 58(4) | 90(4)  | 2(3)   | 43(4) | 2(3)   |
| C(25) | 77(4) | 58(4) | 93(4)  | 9(3)   | 35(4) | 14(3)  |
| C(5)  | 80(4) | 58(4) | 111(5) | 2(3)   | 52(4) | -11(3) |
| C(11) | 59(3) | 64(4) | 93(4)  | -5(3)  | 43(3) | -6(3)  |
| C(40) | 90(5) | 52(4) | 131(5) | 13(3)  | 52(4) | 18(3)  |
| C(20) | 84(5) | 69(4) | 156(6) | -18(4) | 52(4) | -18(3) |

### Cyclic voltammograms of HTC of aromatic aldehydes/ketones

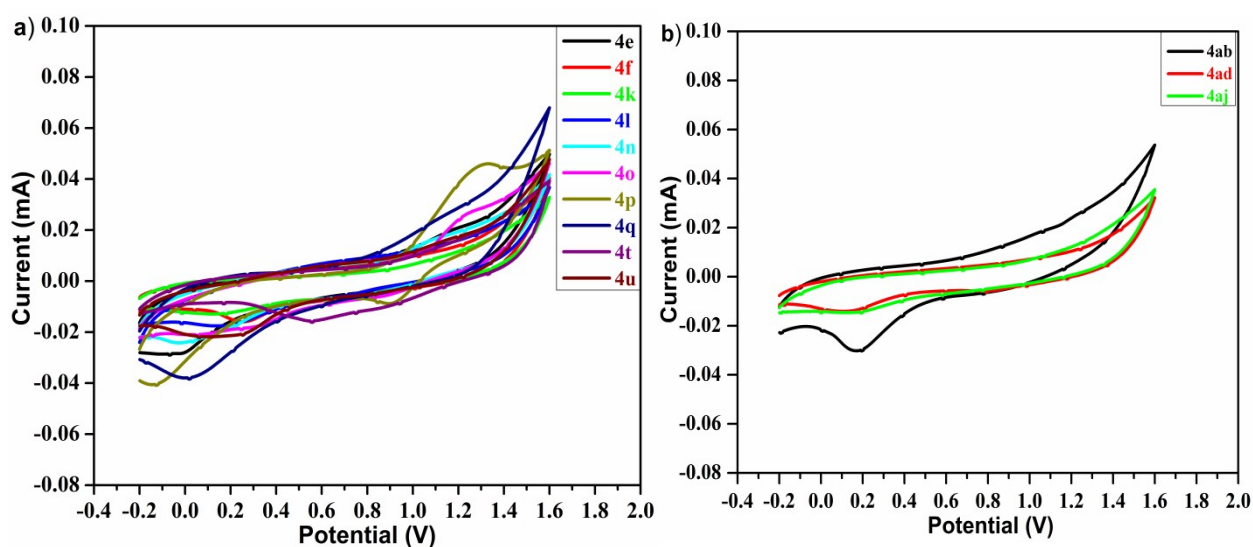

**Figure. S4** a) Cyclic voltammograms of HTCs of aromatic aldehydes (4e, 4f, 4k, 4l, 4n, 4o, 4p, 4q, 4t & 4u) in  $\text{CHCl}_3$ ; b) Cyclic voltammograms of HTCs of aromatic ketones (4ab, 4ad, & 4aj) in  $\text{CHCl}_3$  (0.1 M  $\text{Bu}_4\text{NPF}_6$  in  $\text{CHCl}_3$ ) at a scan rate of 100 mV/s.
